# Supplementary material for: Characterising the microbial and antimicrobial resistance signatures of hospital-acquired pneumonia using nanopore metagenomic sequencing
Source: bioRxiv preprint, doi:10.1101/2025.08.09.669460, version 1 (2025-08-09)
Supplement: Supplementary Table [file 669460_file03.xlsx]

## Sheet: Supplementary Table 1
sample_id	Pseudomonas aeruginosa	Corynebacterium striatum	Streptococcus sp. NSJ-72	Streptococcus anginosus	Streptococcus intermedius	Streptococcus constellatus	Streptococcus milleri	Pseudomonas monteilii	Serratia marcescens	Klebsiella pneumoniae	Klebsiella aerogenes	Klebsiella quasipneumoniae	Klebsiella variicola	Klebsiella africana	Klebsiella quasivariicola	Stenotrophomonas maltophilia	Stenotrophomonas sp. pho	Alcaligenes sp. 1735tsa3	Haemophilus parainfluenzae	Neisseria sp. RH3002v2g	Neisseria subflava	Staphylococcus aureus	Staphylococcus epidermidis	Pseudomonas proteolytica	Elizabethkingia bruuniana	Delftia acidovorans	Delftia sp. Cs1-4	Proteus mirabilis	Neisseria elongata	Neisseria sicca	Neisseria mucosa	Neisseria macacae	Corynebacterium matruchotii	Rothia mucilaginosa	Arachnia propionica	Olsenella sp. oral taxon 807	Lactobacillus johnsonii	Lactobacillus gasseri	Lactobacillus paragasseri	Lacticaseibacillus rhamnosus	Streptococcus sp. oral taxon 431	Streptococcus sp. oral taxon 061	Streptococcus sp. S1	Streptococcus sp. LPB0220	Streptococcus sp. S5	Streptococcus oralis	Streptococcus salivarius	Streptococcus thermophilus	Streptococcus cristatus
10_2	82171	1896	3176	8577	10471	25918	5113	0	0	0	0	0	0	0	0	0	0	0	0	0	0	0	0	0	0	0	0	0	0	0	0	0	0	0	0	0	0	0	0	0	0	0	0	0	0	0	0	0	0
10_3	135997	0	0	0	0	0	0	1096	3449	0	0	0	0	0	0	0	0	0	0	0	0	0	0	0	0	0	0	0	0	0	0	0	0	0	0	0	0	0	0	0	0	0	0	0	0	0	0	0	0
10_4	0	0	0	0	0	0	0	0	0	104842	864	5358	3776	1247	823	0	0	0	0	0	0	0	0	0	0	0	0	0	0	0	0	0	0	0	0	0	0	0	0	0	0	0	0	0	0	0	0	0	0
10_5	0	0	0	0	0	0	0	0	0	99038	0	2851	1987	629	0	0	0	0	0	0	0	0	0	0	0	0	0	0	0	0	0	0	0	0	0	0	0	0	0	0	0	0	0	0	0	0	0	0	0
10_6	0	0	0	0	0	0	0	0	0	0	0	0	0	0	0	135834	1398	842	0	0	0	0	0	0	0	0	0	0	0	0	0	0	0	0	0	0	0	0	0	0	0	0	0	0	0	0	0	0	0
10_7	0	0	0	0	0	0	0	0	0	0	0	0	0	0	0	0	0	0	341	68	1407	338	8302	0	0	0	0	0	0	0	0	0	0	0	0	0	0	0	0	0	0	0	0	0	0	0	0	0	0
11_1	0	0	0	0	0	0	0	0	0	0	0	0	0	0	0	0	0	0	0	0	0	97	0	36	29	0	0	0	0	0	0	0	0	0	0	0	0	0	0	0	0	0	0	0	0	0	0	0	0
11_8	0	0	0	0	0	0	0	0	0	0	0	0	0	0	0	0	0	0	0	0	0	0	0	0	0	7252	147	0	0	0	0	0	0	0	0	0	0	0	0	0	0	0	0	0	0	0	0	0	0
11_9	0	0	0	38220	0	0	9499	0	0	0	0	0	0	0	0	0	0	0	0	0	19647	0	0	0	0	0	0	5246	4526	27312	5480	16144	12247	4501	6871	3738	3251	72928	5797	7221	3184	4524	9059	17600	15924	4673	9196	3348	8678
11_10	0	0	0	0	0	0	0	0	0	0	0	0	0	0	0	0	0	0	0	0	0	0	0	0	0	0	0	0	0	0	0	0	0	48435	0	0	0	0	0	0	0	0	0	2969	2643	0	0	0	0
11_11	1571	0	0	0	0	0	0	0	0	341	0	0	0	0	0	0	0	0	0	0	0	181	7909	0	0	0	0	0	0	0	0	0	0	0	0	0	0	0	0	0	0	0	0	0	0	0	0	0	0
13_1	0	0	0	0	0	0	0	0	0	0	0	0	0	0	0	0	0	0	0	0	0	0	0	0	0	0	0	0	0	0	0	0	0	371	0	0	0	0	0	0	0	0	0	0	0	0	0	0	0
13_2	0	0	0	0	0	0	0	0	0	0	0	0	0	0	0	0	0	0	0	0	0	5337	0	0	0	0	0	0	0	0	0	0	0	0	0	0	0	0	0	0	110	0	0	0	0	67	289	0	0
13_3	47718	0	0	0	0	0	0	0	0	0	0	0	0	0	0	0	0	0	0	0	0	0	0	0	0	0	0	0	0	0	0	0	0	0	0	0	0	0	0	0	0	0	0	0	0	0	0	0	0
13_4	0	0	0	3103	1778	4705	0	0	0	0	0	0	0	0	0	0	0	0	4969	0	0	0	0	0	0	0	0	1753	0	0	0	0	0	0	0	0	0	0	0	0	0	0	0	0	0	2439	0	0	0
13_5	0	0	0	0	0	0	0	0	0	0	0	0	0	0	0	0	0	0	0	0	0	0	0	0	0	0	0	0	0	0	0	0	0	0	0	0	0	0	0	0	0	0	0	0	0	0	0	0	0
13_6	0	0	0	0	0	0	0	0	0	0	0	0	0	0	0	0	0	0	0	0	0	255538	0	0	0	0	0	0	0	0	0	0	0	0	0	0	0	0	0	0	0	0	0	0	0	0	0	0	0
15_1	3229	0	0	0	0	0	0	0	0	25	0	0	0	0	0	90	0	0	0	0	0	0	0	0	0	0	0	0	0	0	0	0	0	0	0	0	0	0	0	0	0	0	0	0	0	0	0	0	0
15_2	0	0	1349	5587	6794	14857	1606	0	0	0	0	0	0	0	0	0	0	0	0	0	0	6634	0	0	0	0	0	0	0	0	0	0	0	0	0	0	0	0	0	0	0	0	0	0	0	0	0	0	0
15_3	0	0	0	0	0	0	0	0	0	0	0	0	0	0	0	0	0	0	0	0	0	0	0	0	0	0	0	0	0	0	0	0	0	0	0	0	0	0	0	0	0	0	0	0	0	0	0	0	0
15_4	24672	0	0	0	0	0	0	0	0	0	0	0	0	0	0	0	0	0	0	0	0	0	0	0	0	0	0	0	0	0	0	0	0	0	0	0	0	0	0	0	0	0	0	0	0	0	0	0	0
15_5	0	0	0	0	0	0	0	0	0	60	0	0	21	0	0	0	0	0	0	0	0	0	0	0	0	0	0	0	0	0	0	0	0	0	0	0	0	0	0	0	0	0	0	0	0	0	0	0	0
15_6	39571	0	0	0	0	0	0	0	0	0	0	0	0	0	0	0	0	0	0	0	0	0	0	0	0	0	0	0	0	0	0	0	0	0	0	0	0	0	0	0	0	0	0	0	0	0	0	0	0
16_7	0	125	0	0	0	0	0	0	0	0	0	0	0	0	0	0	0	0	0	0	0	0	0	0	0	0	0	0	0	0	0	0	0	0	0	0	0	0	0	0	0	0	0	0	0	0	0	0	0
16_8	0	0	0	0	0	0	0	0	0	0	0	0	0	0	0	0	0	0	81	0	0	0	0	0	0	0	0	0	0	0	0	0	0	37	0	0	0	0	0	0	28	27	0	0	0	67	616	36	70
16_9	0	0	0	0	0	0	0	0	0	635	0	0	0	0	0	0	0	0	0	0	0	0	0	0	0	0	0	0	0	0	0	0	0	0	0	0	0	0	0	0	0	0	0	0	0	1163	0	0	0
16_10	0	0	0	0	0	0	0	0	0	0	0	0	0	0	0	0	0	0	0	0	0	0	0	0	0	0	0	0	0	0	0	0	0	0	0	0	0	0	0	0	0	0	0	0	0	0	0	0	0
16_11	0	0	0	0	0	0	0	0	0	0	0	0	0	0	0	0	0	0	0	0	0	0	0	0	0	0	0	0	0	0	0	0	0	0	0	0	0	0	0	0	0	0	0	0	0	0	0	0	0
18_4	0	0	0	0	0	0	0	0	0	0	0	0	0	0	0	0	0	0	0	0	0	0	0	0	0	0	0	0	0	0	0	0	0	0	0	0	0	0	0	0	0	0	0	0	0	0	0	0	0
18_5	0	0	0	0	0	0	0	0	0	0	0	0	0	0	0	0	0	0	0	0	0	0	0	24	0	0	0	0	0	0	0	0	0	0	0	0	0	0	0	0	0	0	0	0	0	0	0	0	0
18_6	0	0	0	0	0	0	0	0	0	0	0	0	0	0	0	0	0	0	0	0	0	0	0	0	0	0	0	0	0	0	0	0	0	0	0	0	0	0	0	0	0	0	0	0	0	0	0	0	0
18_8	0	0	0	0	0	0	0	0	0	0	0	0	0	0	0	0	0	0	0	0	0	40391	0	0	0	0	0	0	0	0	0	0	0	0	0	0	0	0	0	0	0	0	0	0	0	0	0	0	0
18_9	0	0	0	0	0	0	0	0	0	0	0	0	0	0	0	0	0	0	0	0	0	43	225	0	0	0	0	0	0	0	0	0	33	0	0	0	0	0	0	0	0	0	0	0	0	0	0	0	0
18_10	0	0	0	0	0	0	0	0	0	0	0	0	0	0	0	0	0	0	0	0	0	39	0	0	19	0	0	0	0	0	0	0	0	0	0	0	0	0	0	0	0	0	0	0	0	0	0	0	0
19_1	0	0	0	0	0	0	0	0	0	0	0	0	0	0	0	0	0	0	0	0	0	0	0	0	0	0	0	0	0	0	0	0	0	0	0	0	0	0	0	5116	0	0	0	0	0	0	0	0	0
19_2	0	0	0	0	0	0	0	0	0	0	0	0	0	0	0	0	0	0	0	0	0	0	0	0	0	0	0	0	0	0	0	0	0	0	0	0	0	0	0	0	0	0	0	0	0	0	0	0	0
19_3	0	0	0	0	0	0	0	0	0	0	0	0	0	0	0	0	0	0	0	0	0	0	62	0	0	0	0	0	0	0	0	0	0	0	0	0	0	0	0	0	0	0	0	0	0	0	0	0	0
19_4	0	0	0	0	0	0	0	0	0	0	0	0	0	0	0	0	0	0	0	0	0	31	538	0	0	0	0	0	0	0	0	0	0	0	0	0	0	0	0	0	0	0	0	0	0	0	0	0	0
19_5	0	0	0	0	0	0	0	0	0	0	0	0	0	0	0	0	0	0	0	0	0	0	0	0	0	0	0	0	0	0	0	0	0	0	0	0	0	0	0	0	0	0	0	0	0	0	0	0	0
19_6	50834	0	0	0	0	0	0	0	0	0	0	0	0	0	0	0	0	0	0	0	0	81771	0	0	0	0	0	0	0	0	0	0	0	0	0	0	0	0	0	0	0	0	0	0	0	0	0	0	0
2_7	28	0	0	0	0	0	0	0	0	0	0	0	0	0	0	32	0	0	0	0	0	0	0	0	0	0	0	0	0	0	0	0	0	0	0	0	0	0	0	0	0	0	0	0	0	0	0	0	0
2_8	348995	0	0	0	0	0	0	0	0	0	0	0	0	0	0	0	0	0	0	0	0	0	0	0	0	0	0	0	0	0	0	0	0	0	0	0	0	0	0	0	0	0	0	0	0	0	0	0	0
2_9	14	0	0	0	0	0	0	0	0	0	0	0	0	0	0	0	0	0	0	0	0	42	66	0	0	0	0	0	0	0	0	0	0	0	0	0	0	0	0	0	0	0	0	0	0	0	0	0	0
2_10	0	0	0	0	0	0	0	0	0	0	0	0	0	0	0	0	0	0	0	0	0	0	0	0	0	0	0	0	0	0	0	0	0	0	0	0	0	0	0	0	0	0	0	0	0	0	0	0	0
2_11	0	0	0	0	0	0	0	0	0	2297	0	0	0	0	0	0	0	0	0	0	0	0	0	0	0	0	0	0	0	0	0	0	0	0	0	0	0	0	0	0	0	0	0	0	0	0	0	0	0
2_12	0	0	0	0	0	0	0	0	0	0	0	0	0	0	0	0	0	0	0	0	0	138	669	0	0	0	0	0	0	0	0	0	0	0	0	0	0	0	0	0	0	0	0	0	0	0	0	0	0
20_1	0	0	0	0	0	0	0	0	0	0	0	0	0	0	0	0	0	0	0	0	0	13291	0	0	0	0	0	0	0	0	0	0	0	0	0	0	0	0	0	0	0	0	0	0	0	0	0	0	0
20_8	0	0	0	0	0	0	0	0	0	0	0	0	0	0	0	0	0	0	0	0	0	601	412	0	305	0	0	0	0	0	0	0	0	0	0	0	0	0	0	0	0	0	0	0	0	0	0	0	0
20_9	0	0	0	0	0	0	0	0	0	0	0	0	0	0	0	0	0	0	0	0	0	0	0	0	0	0	0	0	0	0	0	0	0	0	0	0	0	0	0	0	0	0	0	0	0	0	0	0	0
20_10	0	0	0	0	0	0	0	0	0	0	0	0	0	0	0	0	0	0	0	0	0	0	0	0	0	0	0	0	0	0	0	0	0	0	0	0	0	0	0	0	0	0	0	0	0	0	0	0	0
20_11	0	0	0	0	0	0	0	0	0	0	0	0	0	0	0	0	0	0	0	0	0	0	0	0	0	0	0	0	0	0	0	0	0	0	0	0	0	0	0	0	0	0	0	0	0	0	0	0	0
21_1	0	0	0	0	0	0	0	0	0	0	0	0	0	0	0	0	0	0	0	0	0	0	0	0	0	0	0	0	0	0	0	0	0	0	0	0	0	0	0	0	0	0	0	0	0	0	0	0	0
21_2	0	0	0	0	0	0	0	0	0	0	0	0	0	0	0	0	0	0	0	0	0	0	0	0	0	0	0	0	0	0	0	0	0	0	0	0	0	0	0	0	0	0	0	0	0	0	0	0	0
21_3	142128	0	0	0	0	0	0	0	0	0	0	0	0	0	0	0	0	0	0	0	0	0	0	0	0	0	0	0	0	0	0	0	0	0	0	0	0	0	0	0	0	0	0	0	0	0	0	0	0
21_4	0	0	0	0	0	0	0	0	0	0	0	0	0	0	0	0	0	0	0	0	0	0	0	0	0	0	0	0	0	0	0	0	0	0	0	0	0	0	0	0	0	0	0	0	0	0	0	0	0
21_5	0	0	0	0	0	0	0	0	0	0	0	0	0	0	0	0	0	0	0	0	0	0	0	0	0	0	0	0	0	0	0	0	0	0	0	0	0	0	0	0	0	0	0	0	0	0	0	0	0
21_6	0	0	0	0	0	0	0	0	0	0	0	0	0	0	0	0	0	0	0	0	0	0	0	0	0	0	0	0	0	0	0	0	0	0	0	0	0	0	0	0	0	0	0	0	0	0	0	0	0
22_3	0	0	0	0	0	0	0	0	0	0	0	0	0	0	0	0	0	0	0	0	0	0	0	0	0	0	0	967	0	0	0	0	0	0	0	0	0	0	0	0	0	0	0	0	0	0	0	0	0
22_6	178412	0	0	0	0	0	0	0	0	0	0	0	0	0	0	0	0	0	0	0	0	0	0	0	0	0	0	0	0	0	0	0	0	0	0	0	0	0	0	0	0	0	0	0	0	0	0	0	0
22_8	0	0	0	0	0	0	0	0	0	0	0	0	0	0	0	0	0	0	0	0	0	0	0	0	0	0	0	0	0	0	0	0	0	0	0	0	0	0	0	1860	0	0	0	0	0	0	0	3888	0
22_9	0	0	0	0	0	0	193	0	0	0	0	0	0	0	0	0	0	0	0	0	0	2069	0	0	0	0	0	0	0	0	0	0	0	1017	0	0	0	0	0	0	0	89	0	121	130	619	260	0	0
22_10	0	0	0	0	0	0	0	0	0	0	0	0	0	0	0	0	0	0	0	0	0	0	3223	0	0	0	0	0	0	0	0	0	0	0	0	0	0	0	0	0	0	0	0	0	0	0	0	0	0
22_11	0	0	0	0	0	0	0	0	0	0	0	0	0	0	0	0	0	0	0	0	0	0	795	0	0	0	0	0	0	0	0	0	0	0	0	0	0	316	914	0	0	0	366	1272	867	519	0	0	0
23_2	0	0	0	0	0	0	0	0	0	84	0	0	0	0	0	0	0	0	0	0	0	0	0	0	0	0	0	0	0	0	0	0	0	0	0	0	0	0	0	0	0	0	0	0	0	0	0	0	0
23_3	0	0	0	0	0	0	0	0	0	0	0	0	0	0	0	0	0	0	0	0	0	0	0	0	0	0	0	0	0	0	0	0	0	0	0	0	0	0	0	0	0	0	0	0	0	0	0	0	0
23_5	0	0	0	0	0	0	0	0	0	0	0	0	0	0	0	179	0	0	0	0	0	0	15	20	0	0	0	0	0	0	0	0	0	0	0	0	0	0	0	0	0	0	0	0	0	0	0	0	0
23_6	0	0	0	0	0	0	0	0	0	0	0	0	0	0	0	0	0	0	0	0	0	0	0	0	0	0	0	0	0	0	0	0	0	179	0	0	0	0	0	0	0	0	0	0	0	0	0	0	0
27_1	0	0	0	0	0	0	0	0	0	20	0	0	0	0	0	0	0	0	0	0	0	0	0	0	0	0	0	0	0	0	0	0	0	0	0	0	0	0	0	0	0	0	0	0	0	0	0	0	0
27_2	0	0	0	0	0	0	0	0	0	0	0	0	0	0	0	0	0	0	0	0	0	0	0	0	0	0	0	0	0	0	0	0	0	0	0	0	0	0	0	0	0	0	0	0	0	0	0	0	0
27_3	0	0	0	0	0	0	0	0	0	0	0	0	0	0	0	0	0	0	0	0	0	0	0	0	0	0	0	0	0	0	0	0	0	0	0	0	0	0	0	0	14	16	0	0	0	0	0	0	0
27_4	0	0	0	0	0	0	0	0	0	13	0	0	0	0	0	0	0	0	0	0	0	0	0	0	0	0	0	0	0	0	0	0	0	0	0	0	0	0	0	0	0	0	0	0	0	0	0	0	0
27_5	0	0	0	0	1052	2465	0	0	0	0	0	0	0	0	0	0	0	0	0	0	0	0	0	0	0	0	0	0	0	0	0	0	0	24927	0	0	0	0	0	0	0	0	0	0	0	84823	2457	0	0
27_6	0	0	0	0	0	0	0	0	0	0	0	0	0	0	0	0	0	0	0	0	0	0	0	0	0	0	0	0	0	0	0	0	0	799	0	0	0	0	0	0	0	0	0	0	0	0	0	0	0
3_1	0	0	0	9569	921	1600	0	0	0	0	0	0	0	0	0	0	0	0	3945	0	0	0	0	0	0	0	0	0	0	0	0	0	0	39599	0	0	0	1107	3765	0	0	0	0	0	0	8601	0	0	0
3_2	0	0	0	0	0	0	0	0	0	0	15	0	0	0	0	0	0	0	0	0	0	0	0	0	0	39	0	0	0	0	0	0	0	0	0	0	0	0	0	0	0	0	0	0	0	0	0	0	0
3_3	890	0	0	0	0	0	0	0	0	0	0	0	0	0	0	12375	0	0	0	0	0	1309	1689	0	0	0	0	0	0	0	0	0	0	0	0	0	0	0	0	0	0	0	0	0	0	0	0	0	0
3_4	0	0	0	0	0	0	0	0	0	3247	70089	0	0	0	0	0	0	0	0	0	0	0	0	0	0	0	0	0	0	0	0	0	0	0	0	0	0	0	0	0	0	0	0	0	0	0	0	0	0
3_5	0	0	0	0	0	0	0	0	0	0	0	0	0	0	0	0	0	0	0	0	0	0	0	0	0	0	0	0	0	0	0	0	0	0	0	0	0	0	0	0	0	0	0	0	0	0	0	0	0
3_6	0	0	0	0	0	0	0	0	0	0	0	0	0	0	0	0	0	0	0	0	0	139	15	0	0	41	0	0	0	0	0	0	0	0	0	0	0	0	0	0	0	0	0	0	0	0	0	0	0
31_1	0	0	0	0	0	0	0	0	0	0	0	0	0	0	0	0	0	0	0	0	0	0	0	0	0	0	0	0	0	0	0	0	0	0	0	0	0	0	0	0	0	0	0	0	0	0	0	0	0
31_2	0	0	0	0	0	0	0	0	0	0	0	0	0	0	0	0	0	0	0	0	0	442144	0	0	0	0	0	0	0	0	0	0	0	0	0	0	0	0	0	0	0	0	0	0	0	0	0	0	0
31_3	0	0	0	0	0	0	0	0	0	0	0	0	0	0	0	0	0	0	0	0	0	0	0	0	0	0	0	0	0	0	0	0	0	0	0	0	0	0	0	0	0	0	0	0	0	2387	0	0	0
31_4	10855	0	0	0	0	0	0	0	28263	0	0	0	0	0	0	0	0	0	0	0	0	0	0	0	0	0	0	0	0	0	0	0	0	0	0	0	0	0	0	0	0	0	0	0	0	0	0	0	0
31_5	0	0	0	0	0	0	0	0	0	0	0	0	0	0	0	0	0	0	0	0	0	0	0	0	0	0	0	0	0	0	0	0	0	0	0	0	0	0	0	0	0	0	0	0	0	0	0	0	0
31_6	0	0	0	0	0	0	0	0	0	0	0	0	0	0	0	0	0	0	0	0	0	0	0	0	0	0	0	0	0	0	0	0	0	0	0	0	0	0	0	0	0	0	0	0	0	0	0	0	0
32_7	0	0	0	0	0	0	0	0	0	11	0	0	0	0	0	0	0	0	0	0	0	0	0	0	0	0	0	0	0	0	0	0	0	0	0	0	0	0	0	0	0	0	0	0	0	0	0	0	0
32_8	302686	0	0	0	0	0	0	0	0	0	0	0	0	0	0	0	0	0	0	0	0	0	0	0	0	0	0	0	0	0	0	0	0	0	0	0	0	0	0	0	0	0	0	0	0	0	0	0	0
32_9	52	0	0	0	0	0	0	0	38	68	0	0	0	0	0	0	0	0	0	0	0	0	0	0	0	0	0	0	0	0	0	0	0	0	0	0	0	0	0	0	0	0	0	0	0	0	25	0	0
32_10	0	0	0	0	0	0	0	0	0	0	0	0	0	0	0	0	0	0	0	95	3539	0	0	0	0	0	0	0	0	0	88	0	0	0	0	0	0	0	0	0	103	0	0	0	0	0	525	0	0
32_11	0	0	0	0	0	0	0	0	0	30	0	0	0	0	0	0	0	0	0	0	0	0	0	0	0	0	0	0	0	0	0	0	0	0	0	0	0	0	0	0	0	0	0	0	0	0	0	0	0
32_12	0	0	0	0	0	0	0	0	0	195	0	0	0	0	0	0	0	0	0	0	0	0	0	0	0	0	0	0	0	0	0	0	0	0	0	0	0	0	0	8706	0	0	0	0	0	0	0	0	0
33_1	0	0	0	0	0	0	0	0	0	0	0	0	0	0	0	0	0	0	0	0	0	0	0	0	0	0	0	0	0	0	0	0	0	0	0	0	0	0	0	0	0	0	0	0	0	0	0	0	0
33_2	0	0	0	0	0	0	0	0	0	532036	0	13380	9986	0	0	0	0	0	0	0	0	0	0	0	0	0	0	0	0	0	0	0	0	0	0	0	0	0	0	0	0	0	0	0	0	0	0	0	0
33_3	0	0	0	0	0	0	0	0	0	295473	0	6907	5475	1757	0	0	0	0	0	0	0	0	0	0	0	0	0	0	0	0	0	0	0	0	0	0	0	0	0	0	0	0	0	0	0	0	0	0	0
33_4	0	0	0	0	0	0	0	0	0	0	0	0	0	0	0	0	0	0	0	0	0	175206	11611	0	0	0	0	0	0	0	0	0	0	0	0	0	0	0	0	0	0	0	0	0	0	0	0	0	0
33_5	0	0	0	0	0	0	0	0	0	0	0	0	0	0	0	0	0	0	0	0	0	0	0	0	0	0	0	0	0	0	0	0	0	0	0	0	0	0	0	0	0	0	0	0	0	0	0	0	0
33_6	0	0	0	0	0	0	0	0	0	0	0	0	0	0	0	0	0	0	0	0	0	0	0	0	0	0	0	0	0	0	0	0	0	679	0	0	0	0	0	0	0	0	0	0	0	0	4140	0	0
34_7	0	0	0	14963	0	0	0	0	0	0	0	0	0	0	0	0	0	0	0	0	0	59664	0	0	0	0	0	0	0	0	0	0	0	39041	0	0	0	0	0	0	0	0	8789	12138	14118	20274	44957	0	0
34_8	0	0	0	0	0	0	0	0	0	0	0	0	0	0	0	0	0	0	0	0	0	0	0	0	0	0	0	0	0	0	0	0	0	0	0	0	0	0	0	0	0	0	0	0	0	0	0	0	0
34_9	3586	0	0	0	0	0	0	0	0	0	0	0	0	0	0	0	0	0	0	0	0	0	0	0	0	0	0	0	0	0	0	0	0	0	0	0	0	0	0	4263	0	0	0	0	0	0	0	0	0
34_11	0	0	0	0	0	0	0	0	0	0	0	19	0	0	0	0	0	0	0	0	0	0	0	0	0	0	0	0	0	0	0	0	0	18	0	0	0	0	0	0	0	0	0	0	0	0	32	0	0
34_12	0	0	0	0	0	0	0	0	0	0	0	0	0	0	0	0	0	0	0	0	0	1091	28088	0	0	0	0	0	0	0	0	0	0	0	0	0	0	0	0	0	0	0	0	0	0	0	0	0	0
35_1	0	0	0	0	0	0	0	0	0	0	0	0	0	0	0	0	0	0	1083	0	0	116	3668	0	0	0	0	0	0	0	0	0	0	0	0	0	0	520	1182	0	0	0	0	0	0	483	0	0	0
35_2	0	0	0	0	0	0	0	0	0	0	0	0	0	0	0	0	0	0	0	0	0	0	0	0	0	0	0	0	0	0	0	0	0	0	0	0	0	0	0	0	0	0	0	0	0	0	0	0	0
35_3	0	0	0	0	0	0	0	0	0	0	0	0	0	0	0	0	0	0	0	0	0	0	0	0	0	0	0	0	0	0	0	0	0	0	0	0	0	0	0	0	0	0	0	0	0	0	0	0	0
35_4	0	0	0	0	0	0	0	0	0	0	3579	7818	4935	0	0	0	0	0	0	0	0	4873	0	0	0	0	0	0	0	0	0	0	0	0	0	0	0	0	0	0	0	0	0	0	0	0	0	0	0
35_5	0	0	0	0	0	0	0	0	0	0	0	0	0	0	0	0	0	0	0	0	0	0	0	0	0	0	0	0	0	0	0	0	0	0	0	0	0	0	0	0	0	0	0	0	0	0	0	0	0
35_6	12720	0	0	0	0	0	0	0	0	0	0	0	0	0	0	0	0	0	0	0	0	0	0	0	0	0	0	70213	0	0	0	0	0	0	0	0	0	0	0	0	0	0	0	0	0	0	0	0	0
37_1	0	0	0	0	0	560	0	0	0	0	0	0	0	0	0	0	0	0	0	0	0	1562	0	0	0	0	0	0	0	1661	3038	436	0	0	0	0	0	0	0	0	0	0	0	0	0	0	0	0	0
37_2	0	0	0	0	0	0	0	0	0	0	0	0	0	0	0	0	0	0	0	0	0	3412	0	0	0	0	0	0	0	0	0	0	0	11241	551	0	0	0	0	0	0	0	605	637	555	0	3330	0	0
37_3	0	0	0	0	0	0	0	0	0	0	0	0	0	0	0	0	0	0	0	0	0	4022	78390	0	0	0	0	0	0	0	0	0	0	0	0	0	0	0	0	0	0	0	0	0	0	0	0	0	0
37_4	0	0	0	0	0	0	0	0	0	0	0	0	0	0	0	0	0	0	0	0	0	0	0	0	0	0	0	0	0	0	0	0	0	0	0	0	0	0	0	0	0	0	0	0	0	0	0	0	0
37_5	0	0	0	0	0	0	0	0	0	0	0	0	0	0	0	0	0	0	0	0	0	0	0	0	0	0	0	0	0	0	0	0	0	0	0	0	0	0	0	0	0	0	0	0	0	0	0	0	0
37_6	0	0	0	0	0	0	0	0	0	0	13821	0	0	0	0	0	0	0	0	0	0	568	0	0	0	0	0	0	0	0	0	0	0	0	0	0	0	0	0	0	0	0	0	0	0	0	0	0	0
38_1	0	0	0	0	0	0	0	0	0	0	894	1076	933	0	0	0	0	0	0	0	0	0	0	0	0	0	0	0	0	0	0	0	0	0	0	0	0	0	0	0	0	0	0	0	0	0	0	0	0
38_2	0	0	0	0	0	0	0	0	0	0	0	0	0	0	0	0	0	0	0	0	0	0	0	0	0	0	0	0	0	0	0	0	0	0	0	325	0	0	0	0	0	0	0	0	0	0	0	0	0
38_3	0	0	0	0	0	0	0	0	0	0	0	0	0	0	0	0	0	0	0	0	0	0	0	0	0	0	0	0	0	0	0	0	0	0	0	0	0	0	0	0	0	0	0	0	0	0	0	0	0
38_4	0	0	0	0	0	0	0	0	0	0	0	0	0	0	0	0	0	0	0	0	0	0	0	0	0	0	0	0	0	0	0	0	0	0	0	0	0	0	0	0	0	0	0	0	0	0	0	0	0
38_5	0	5051	0	0	0	0	0	0	0	0	0	0	0	0	0	0	0	0	0	0	0	58543	253256	0	0	0	0	0	0	0	0	0	0	0	0	0	0	0	0	0	0	0	0	0	0	0	0	0	0
38_6	0	0	0	0	0	0	0	0	0	0	0	0	0	0	0	0	0	0	0	0	0	0	0	0	0	0	0	0	0	0	0	0	0	0	0	0	0	0	0	0	0	0	0	0	0	0	0	0	0
39_1	339047	0	0	0	0	0	0	0	0	0	0	0	0	0	0	0	0	0	0	0	0	0	0	0	0	0	0	0	0	0	0	0	0	0	0	0	0	0	0	0	0	0	0	0	0	0	0	0	0
39_2	0	0	0	0	0	0	0	0	0	0	0	0	0	0	0	0	0	0	0	0	0	0	582450	0	0	0	0	0	0	0	0	0	0	0	0	0	0	0	0	0	0	0	0	0	0	0	0	0	0
39_3	247	0	0	0	0	0	0	0	0	0	0	0	0	0	0	0	0	0	0	0	0	0	0	0	0	0	0	0	0	0	0	0	0	0	0	0	0	0	0	0	0	0	0	0	0	0	0	0	0
39_4	0	0	0	0	0	0	0	0	0	0	0	0	0	0	0	0	0	0	0	0	0	0	0	0	0	0	0	0	0	0	0	0	0	0	0	0	0	0	0	0	0	0	0	0	0	0	0	0	0
39_5	41930	0	0	0	0	0	0	0	0	0	0	0	0	0	0	0	0	0	0	0	0	408861	0	0	0	0	0	0	0	10455	0	2861	0	0	0	0	0	0	0	0	0	0	0	0	0	0	0	0	0
39_6	0	0	0	0	0	0	0	0	0	0	0	0	0	0	0	0	0	0	0	0	0	685342	0	0	0	0	0	0	0	0	0	0	0	0	0	0	0	0	0	0	0	0	0	0	0	0	0	0	0
4_7	483	0	0	0	0	0	0	0	0	0	0	0	0	0	0	0	0	0	0	0	0	0	254	0	0	0	0	0	0	0	0	0	0	0	0	0	0	0	0	0	0	0	0	0	0	0	0	0	0
4_8	0	0	0	0	0	0	0	0	0	0	0	0	0	0	0	0	0	0	0	0	0	0	941	0	139	1433	0	0	0	0	0	0	0	0	0	0	0	0	0	0	0	0	0	0	0	0	0	0	0
4_9	0	0	0	0	0	0	0	0	0	0	0	0	0	0	0	0	0	0	0	0	0	27730	0	0	0	0	0	0	0	0	0	0	0	3582	0	0	0	0	0	0	0	0	0	0	0	2539	0	0	0
4_10	0	0	0	0	0	0	0	0	0	0	0	0	0	0	0	0	0	0	0	0	0	645	10693	0	0	0	0	0	0	0	0	0	0	0	0	0	0	0	0	0	0	0	0	0	0	0	0	311	0
40_7	0	0	0	0	0	0	0	0	0	265	0	0	0	0	0	0	0	0	0	0	0	0	0	0	0	0	0	0	0	0	0	0	0	69	0	0	0	0	0	0	0	0	0	0	0	68	0	0	0
40_8	0	0	0	0	0	0	0	0	0	0	0	0	0	0	0	0	0	0	0	0	0	0	0	0	0	0	0	0	0	0	0	0	0	0	0	0	0	0	0	0	0	0	0	0	0	0	0	0	0
40_9	18588	0	0	0	0	0	0	0	0	156	0	0	0	0	0	0	0	0	0	0	0	0	0	0	0	0	0	0	0	0	0	0	0	0	0	0	0	0	0	0	0	0	0	0	0	0	0	0	0
40_10	0	0	0	0	0	0	0	0	0	226	0	0	0	0	0	0	0	0	0	0	0	0	0	0	0	0	0	0	0	0	0	0	0	218	0	0	0	0	0	0	0	0	0	0	0	0	0	0	0
40_11	0	0	0	0	0	0	0	0	0	0	0	0	0	0	0	130346	0	0	0	0	0	0	0	0	0	0	0	0	0	0	0	0	0	0	0	0	0	0	0	0	0	0	0	0	0	0	0	0	0
40_12	0	0	0	0	0	0	0	0	0	0	0	0	0	0	0	0	0	0	0	0	0	0	0	0	0	0	0	0	0	0	0	0	0	0	0	0	0	0	0	0	0	0	0	0	0	0	942	6127	0
41_2	0	0	0	0	0	0	0	0	0	0	0	0	0	0	0	0	0	0	0	0	0	0	5044	0	0	0	0	0	0	0	0	0	0	0	0	0	0	0	0	0	0	0	0	0	0	0	0	0	0
41_3	0	0	0	0	0	0	0	0	0	0	0	0	0	0	0	0	0	0	0	0	0	5512	0	0	0	0	0	0	0	0	0	0	0	0	0	0	0	0	0	0	0	0	0	0	0	0	0	0	0
41_4	0	0	0	0	0	0	0	0	0	0	0	0	0	0	0	0	0	0	0	0	0	162449	0	0	0	0	0	0	0	0	0	0	0	0	0	0	0	0	0	0	0	0	0	0	0	0	0	0	0
41_5	0	0	0	0	0	5420	0	0	0	0	0	0	0	0	0	218429	0	0	0	0	0	0	0	0	0	0	0	0	0	3940	3872	0	0	0	0	0	0	12317	0	0	0	0	0	0	0	5441	0	0	0
41_6	0	0	0	0	0	0	0	0	0	32909	0	0	0	0	0	0	0	0	0	0	0	0	0	0	0	0	0	0	0	0	0	0	0	0	0	0	0	0	0	4845	0	0	0	0	0	264467	0	0	0
42_1	0	0	0	0	0	0	0	0	0	254961	0	6063	4714	0	0	0	0	0	0	0	0	0	0	0	0	0	0	0	0	0	0	0	0	0	0	0	0	0	0	0	0	0	0	0	0	0	0	0	0
42_2	0	0	0	0	0	0	0	0	0	45957	0	3469	0	0	0	0	0	0	0	0	0	0	0	0	0	0	0	0	0	0	0	0	0	0	0	0	0	0	0	0	0	0	0	0	0	0	0	0	0
42_3	0	0	0	0	0	0	0	0	0	0	373614	0	0	0	0	0	0	0	0	0	0	0	0	0	0	0	0	0	0	0	0	0	0	0	0	0	0	0	0	0	0	0	0	0	0	0	0	0	0
42_4	0	0	0	0	0	0	0	0	0	19	0	0	0	0	0	0	0	0	0	0	0	0	0	0	0	0	0	0	0	0	0	0	0	0	0	0	0	0	0	0	0	0	0	0	0	0	0	0	0
42_5	0	0	0	0	0	0	0	0	0	75	0	0	0	0	0	0	0	0	0	0	0	0	0	0	0	0	0	0	0	0	0	0	0	0	0	0	0	0	0	0	0	0	0	0	0	0	0	0	0
42_6	0	0	0	0	0	0	0	0	0	0	0	0	0	0	0	0	0	0	0	0	0	0	0	0	0	0	0	0	0	0	0	0	0	0	0	0	0	0	0	0	0	0	0	0	0	20	0	0	0
43_7	0	0	0	0	0	0	0	0	0	0	0	0	0	0	0	0	0	0	0	0	0	18147	0	0	0	0	0	0	0	0	0	0	0	0	0	0	0	0	0	0	0	0	0	0	0	0	0	0	0
43_8	0	0	0	0	0	0	0	0	0	0	0	0	0	0	0	1626	0	0	0	0	0	144994	0	0	0	0	0	0	0	0	0	0	0	0	0	0	0	0	0	0	0	0	0	0	0	0	0	0	0
43_9	0	0	0	0	0	0	0	0	0	0	0	0	0	0	0	0	0	0	0	0	0	0	0	0	0	0	0	0	0	0	0	0	0	0	0	0	0	0	0	0	0	0	0	0	0	0	0	0	0
43_10	0	0	0	0	0	0	0	0	0	0	0	0	0	0	0	0	0	0	0	0	0	0	178	0	0	0	0	0	0	0	0	0	0	0	0	0	0	0	0	0	0	0	0	0	0	0	0	0	0
43_11	0	0	0	0	0	0	0	0	0	0	0	0	0	0	0	0	0	0	0	0	0	0	0	0	0	0	0	0	0	0	0	0	0	134541	0	0	0	0	0	0	1772	0	3676	9980	8565	0	0	0	0
43_12	0	0	0	0	0	0	0	0	0	0	0	0	0	0	0	586408	6600	0	0	0	0	0	0	0	0	0	0	0	0	0	0	0	0	0	0	0	0	0	0	0	0	0	0	0	0	0	0	0	0
44_7	0	0	0	0	0	0	0	0	0	0	0	0	0	0	0	0	0	0	0	0	0	0	0	0	0	0	0	0	0	0	0	0	0	0	0	0	0	0	0	0	0	0	0	0	0	0	0	0	0
44_8	0	0	0	0	0	0	0	0	0	107	0	0	0	0	0	0	0	0	0	0	0	0	0	0	0	0	0	0	0	0	0	0	0	0	0	0	0	0	0	157	0	0	0	0	0	0	0	0	0
44_9	0	0	0	0	0	0	0	0	0	36	0	0	0	0	0	0	0	0	0	0	0	0	0	0	0	0	0	0	0	0	0	0	0	0	0	0	0	0	0	0	0	0	0	0	0	11	0	0	0
44_10	0	0	0	0	0	0	0	0	0	0	0	0	0	0	0	0	0	0	0	0	0	2723	131520	0	0	0	0	0	0	0	0	0	0	0	0	0	0	0	0	2624	0	0	0	0	0	0	0	0	0
44_11	0	0	0	0	0	0	0	0	0	0	0	0	0	0	0	0	0	0	0	0	0	0	0	0	0	0	0	0	0	0	0	0	0	0	0	0	0	0	0	0	0	0	0	0	0	0	0	0	0
44_12	0	0	0	0	0	0	0	0	0	0	0	0	0	0	0	0	0	0	0	0	0	3920	0	0	0	0	0	0	0	0	0	0	0	0	0	0	0	0	0	5650	0	0	0	0	0	0	0	0	0
45_1	0	0	0	0	0	0	0	0	0	106773	0	1895	0	0	0	0	0	0	0	0	0	0	0	0	0	0	0	0	0	0	0	0	0	0	0	0	0	0	0	0	0	0	0	0	0	0	0	0	0
45_2	0	0	0	0	0	0	0	0	0	0	0	0	0	0	0	0	0	0	0	0	0	686793	0	0	0	0	0	0	0	0	0	0	0	0	0	0	0	0	0	0	0	0	0	0	0	0	0	0	0
45_3	0	0	1837	5113	7564	18296	1875	0	0	0	0	0	0	0	0	855	0	0	0	0	0	0	0	0	0	0	0	0	0	0	0	0	0	0	0	0	0	0	0	0	0	0	0	0	0	0	0	0	0
45_4	0	0	0	0	0	0	0	0	0	0	0	0	0	0	0	0	0	0	0	0	0	602217	0	0	0	0	0	0	0	0	0	0	0	0	0	0	0	0	0	0	0	0	0	0	0	0	0	0	0
45_5	0	0	0	0	8558	0	0	0	0	0	0	0	0	0	0	0	0	0	6548	0	0	0	0	0	0	0	0	0	0	0	0	0	0	0	0	0	0	0	0	0	0	0	0	0	0	86056	0	0	0
45_6	0	0	0	0	0	0	0	0	0	0	3615	3964	0	0	0	0	0	0	0	0	0	108327	0	0	0	0	0	0	0	0	0	0	0	0	0	0	0	0	0	0	0	0	0	0	0	0	0	0	0
46_1	0	0	0	0	0	0	0	0	0	0	0	0	0	0	0	0	0	0	0	0	0	0	0	0	0	0	0	0	0	0	0	0	0	0	0	0	0	0	0	0	0	0	0	0	0	0	0	0	0
46_2	0	0	0	0	0	0	0	0	0	0	0	0	0	0	0	0	0	0	0	0	0	0	0	0	0	0	0	0	0	0	0	0	0	0	0	0	0	0	0	0	0	0	0	0	0	0	0	0	0
46_3	0	0	0	0	0	0	0	0	0	0	0	0	0	0	0	0	0	0	0	0	0	0	0	0	0	0	0	0	0	0	0	0	0	0	0	0	0	0	0	0	0	0	0	0	0	0	0	0	0
46_4	0	0	0	0	0	0	0	0	0	0	0	0	0	0	0	0	0	0	0	0	0	57	0	0	0	0	0	0	0	0	0	0	0	0	0	0	0	0	0	0	0	0	0	0	0	0	0	0	0
46_5	0	0	0	0	0	0	0	0	0	0	0	0	0	0	0	0	0	0	0	0	0	0	3846	0	0	0	0	0	0	0	0	0	0	0	0	0	0	0	0	0	0	0	0	0	0	0	0	0	0
46_6	0	0	0	0	0	0	0	0	0	0	0	0	0	0	0	0	0	0	0	0	0	0	34	0	0	0	0	0	0	0	0	0	0	0	0	0	0	0	0	0	0	0	0	0	0	0	0	0	0
47_7	0	0	0	0	0	0	0	0	0	274	0	0	0	0	0	0	0	0	412	0	193	0	0	0	0	0	0	0	0	0	250	0	0	0	0	0	0	0	0	0	0	0	0	0	0	0	0	0	0
47_8	0	0	0	0	0	0	0	0	0	0	0	0	0	0	0	0	0	0	0	0	0	575115	0	0	0	0	0	0	0	0	0	0	0	0	0	0	0	0	0	0	0	0	0	0	0	0	0	0	0
47_9	0	0	0	0	0	0	0	0	0	199	0	0	0	0	0	0	0	0	0	0	0	0	0	0	0	0	0	0	0	0	0	0	0	0	0	0	0	0	0	0	0	0	0	0	0	0	0	0	0
47_10	0	0	0	0	0	0	0	0	0	0	0	0	0	0	0	0	0	0	0	0	0	20002	0	0	0	0	0	0	0	0	0	0	0	0	0	0	0	0	0	2516	0	0	0	0	0	0	0	0	0
47_11	130061	0	0	0	0	0	0	0	0	0	0	0	0	0	0	0	0	0	0	0	0	0	0	0	0	0	0	0	0	0	0	0	0	0	0	0	0	0	0	0	0	0	0	0	0	0	0	0	0
48_1	0	0	0	0	0	0	0	0	0	0	0	0	0	0	0	0	0	0	0	0	0	0	0	0	0	0	0	0	0	0	0	0	0	0	0	0	0	0	0	0	0	0	0	0	0	0	0	0	0
48_2	0	0	0	0	0	0	0	0	0	215	0	0	0	0	0	0	0	0	0	0	0	0	146	0	0	0	0	0	0	0	0	0	0	0	0	0	0	0	0	0	0	0	0	0	0	0	0	0	0
48_3	0	0	0	0	0	0	0	0	0	0	0	0	0	0	0	0	0	0	0	0	0	201016	0	0	0	0	0	0	0	0	0	0	0	0	0	0	0	0	0	0	0	0	0	0	0	0	0	0	0
48_4	0	0	0	0	0	0	0	0	0	0	0	0	0	0	0	0	0	0	0	0	0	0	0	0	0	0	0	0	0	0	0	0	0	0	0	0	0	0	0	0	0	0	0	0	0	0	0	0	0
48_5	0	0	0	0	0	0	0	0	0	0	0	0	0	0	0	0	0	0	0	0	0	0	0	0	0	0	0	0	0	0	0	0	0	0	0	0	0	0	0	0	0	0	0	0	0	239	0	0	0
48_6	0	0	0	0	0	0	0	0	0	0	0	0	0	0	0	0	0	0	0	0	0	0	0	0	0	0	0	0	0	0	0	0	0	0	0	0	0	0	0	0	0	0	0	0	0	0	0	0	0
49_7	0	0	0	0	0	0	0	0	0	0	0	0	0	0	0	0	0	0	539	0	1344	0	0	0	0	0	0	0	927	19411	2814	1304	0	0	0	0	0	0	0	0	0	0	0	0	0	0	0	0	0
49_8	0	0	0	0	0	0	0	0	0	0	0	0	0	0	0	0	0	0	0	0	0	526411	0	0	0	0	0	0	0	0	0	0	0	0	0	0	0	0	0	0	0	0	0	0	0	0	0	0	0
49_9	456220	0	0	0	0	0	0	0	0	0	0	0	0	0	0	0	0	0	0	0	0	0	0	0	0	0	0	0	0	0	0	0	0	0	0	0	0	0	0	0	0	0	0	0	0	0	0	0	0
49_10	0	0	0	0	0	1173	0	0	0	0	0	0	0	0	0	0	0	0	5114	0	0	0	0	0	0	0	0	0	0	0	0	0	0	8907	0	0	0	0	0	0	0	1310	0	0	0	11012	0	0	0
49_11	0	0	0	4502	10623	7782	2200	0	0	0	0	0	0	0	0	0	0	0	2060	1427	33287	0	0	0	0	0	0	0	1699	0	0	0	0	0	0	0	0	0	0	0	0	0	0	0	0	2567	0	0	1106
49_12	0	0	0	0	0	0	0	0	0	0	0	0	0	0	0	5071	0	0	0	0	0	655229	0	0	0	0	0	0	0	0	0	0	0	0	0	0	0	0	0	0	0	0	0	0	0	0	0	0	0
5_2	85	0	0	0	0	0	0	0	0	0	20	0	0	0	0	13	0	0	0	0	0	0	0	0	0	0	0	0	0	0	0	0	0	0	0	0	0	0	0	0	0	0	0	0	0	0	0	0	0
5_3	0	0	0	0	0	0	0	0	0	0	0	0	0	0	0	0	0	0	0	0	0	0	0	0	0	0	0	0	0	0	0	0	0	0	0	0	0	0	0	0	0	0	0	0	0	0	0	0	0
5_4	0	0	0	0	0	0	0	0	0	5835	78249	0	0	0	0	0	0	0	0	0	0	0	0	0	0	0	0	0	0	0	0	0	0	0	0	0	0	0	0	0	0	0	0	0	0	0	0	0	0
5_5	0	0	0	0	0	0	0	0	0	0	0	0	0	0	0	0	0	0	5884	0	0	0	1065	0	0	0	0	0	0	0	0	0	0	16821	0	0	0	0	0	0	1321	0	1057	2457	1819	2855	0	0	0
5_6	0	0	0	0	0	0	0	0	0	2018	0	0	0	0	0	0	0	0	0	0	0	0	0	0	0	0	0	0	0	0	0	0	0	195	0	0	0	0	0	0	0	0	0	0	0	0	0	0	0
5_8	142	0	0	0	0	0	0	0	0	0	0	0	0	0	0	0	0	0	0	0	0	0	146	0	0	0	0	0	0	0	0	0	0	0	0	0	0	0	0	0	0	0	0	0	0	0	0	0	0
50_6	0	0	0	0	0	0	0	0	0	0	35	0	0	0	0	0	0	0	0	0	0	0	0	0	0	0	0	0	0	0	0	0	0	0	0	0	0	0	0	0	0	0	0	0	0	0	0	0	0
50_7	0	0	0	0	0	0	0	0	0	0	0	0	0	0	0	0	0	0	0	0	0	0	0	0	0	0	0	0	0	0	0	0	0	0	0	0	0	0	0	0	0	0	0	0	0	0	0	0	0
50_8	0	0	0	0	0	0	0	0	0	0	0	0	0	0	0	0	0	0	0	0	0	0	0	0	0	0	0	0	0	0	0	0	0	400321	0	0	0	0	0	0	9315	6106	11882	18876	18409	9649	11146	0	0
50_9	0	391513	0	0	0	0	0	0	0	0	0	0	0	0	0	0	0	0	0	0	0	0	0	0	0	0	0	0	0	0	0	0	0	0	0	0	0	0	0	0	0	0	0	0	0	5505	0	0	0
50_10	0	0	0	0	0	0	0	0	0	0	0	0	0	0	0	0	0	0	0	0	0	0	0	0	0	0	0	0	0	0	0	0	0	0	0	0	0	0	0	0	0	0	0	0	0	0	0	0	0
51_6	0	0	0	0	0	0	0	0	0	0	0	0	0	0	0	0	0	0	0	0	0	827524	0	0	0	0	0	0	0	0	0	0	0	0	0	0	0	0	0	0	0	0	0	0	0	0	0	0	0
51_7	0	0	0	0	0	0	0	0	0	550810	5055	31358	22062	7310	5270	0	0	0	0	0	0	0	0	0	0	0	0	0	0	0	0	0	0	0	0	0	0	0	0	0	0	0	0	0	0	0	0	0	0
51_8	0	108	0	0	0	0	0	0	0	0	0	0	0	0	0	0	0	0	0	0	0	16	0	0	0	0	0	0	0	0	0	0	0	0	0	0	0	0	0	0	0	0	0	0	0	28	0	0	0
51_10	0	0	0	0	0	0	0	0	0	0	0	0	0	0	0	0	0	0	0	0	0	0	0	0	0	0	0	0	0	0	0	0	0	0	0	0	0	0	0	0	0	0	0	0	0	0	0	0	0
7_1	0	0	0	0	0	0	0	0	0	0	0	0	0	0	0	0	0	0	0	0	0	0	0	0	0	0	0	0	0	0	0	0	0	0	0	0	0	0	0	0	0	0	0	0	0	0	0	0	0
7_2	56743	0	0	0	0	0	0	0	0	0	0	0	0	0	0	0	0	0	0	0	0	0	0	0	0	0	0	0	0	0	0	0	0	0	0	0	0	0	0	0	0	0	0	0	0	0	0	0	0
7_3	0	0	0	0	0	0	0	0	0	7496	1470	1977	1585	0	0	0	0	0	0	0	0	0	2201	0	0	0	0	0	0	0	0	0	0	0	0	0	0	0	0	0	0	0	0	0	0	0	0	0	0
7_4	0	0	0	0	0	0	0	0	0	0	0	0	0	0	0	0	0	0	0	0	0	0	0	0	0	0	0	0	0	0	0	0	0	0	0	0	0	0	0	0	0	0	0	0	0	0	0	0	0
7_5	0	0	0	0	0	0	0	0	0	0	0	0	0	0	0	0	0	0	0	0	0	0	0	0	0	0	0	0	0	0	0	0	0	0	0	0	0	0	0	0	0	0	0	0	0	0	0	0	0
7_6	0	0	0	0	0	0	0	0	0	1552	0	0	0	0	0	0	0	0	0	0	0	11568	90	0	0	0	0	0	0	0	0	0	0	0	0	0	0	0	0	0	0	0	0	0	0	0	0	0	0
8_1	0	0	0	0	0	0	0	0	0	0	0	0	0	0	0	0	0	0	0	0	0	19634	0	0	0	0	0	0	0	0	0	0	0	0	0	0	0	0	0	13778	0	0	0	0	0	0	0	0	0
8_2	0	0	0	0	0	0	0	0	0	0	0	0	0	0	0	0	0	0	0	0	0	0	0	0	0	0	0	0	0	0	0	0	0	0	0	0	0	0	0	0	0	0	0	0	0	0	0	0	0
8_3	0	0	0	353	0	14	0	0	0	14	0	0	0	0	0	0	0	0	0	0	0	664	0	0	0	0	0	0	0	0	0	0	0	0	0	0	0	0	0	0	0	0	0	0	0	0	0	15	0
8_4	27010	0	0	0	0	0	0	0	0	0	0	0	0	0	0	0	0	0	0	0	0	0	0	0	0	0	0	0	0	0	0	0	0	0	0	0	0	0	0	0	0	0	0	0	0	0	0	0	0
8_5	0	0	76	376	408	923	0	0	0	0	0	0	0	0	0	0	0	0	0	0	0	0	0	0	0	0	0	0	0	0	0	0	0	0	0	0	0	0	0	0	0	0	0	0	0	180	0	0	0
8_6	0	0	0	0	0	0	0	0	0	0	0	0	0	0	0	0	0	0	0	0	0	0	0	0	0	0	0	0	0	0	0	0	0	0	0	0	0	0	0	31	0	0	0	0	0	0	0	0	0
9_1	0	0	0	0	0	0	0	0	0	0	0	0	0	0	0	0	0	0	0	0	0	325466	0	0	0	0	0	0	0	0	0	0	0	0	0	0	0	0	0	0	0	0	0	0	0	0	0	0	0
9_2	0	0	0	0	0	0	0	0	0	0	0	0	0	0	0	0	0	0	0	0	0	209211	0	0	0	0	0	0	0	0	0	0	0	0	0	0	0	0	0	0	0	0	0	0	0	0	0	0	0
9_3	0	0	0	0	0	0	0	0	0	0	0	0	0	0	0	0	0	0	0	0	0	0	0	0	0	0	0	0	0	0	0	0	0	0	0	0	0	0	0	0	0	0	0	0	0	46	0	0	0
9_4	0	0	0	0	0	0	0	0	0	0	0	0	0	0	0	0	0	0	0	0	0	16224	90	0	0	0	0	0	0	0	0	0	0	0	0	0	0	0	0	0	0	0	0	0	0	0	0	0	0
9_5	0	0	0	0	0	0	0	0	0	0	0	0	0	0	0	0	0	0	0	0	0	38	0	0	0	0	0	0	0	0	0	0	0	0	0	0	0	0	0	0	0	0	0	0	0	0	0	0	0
9_6	0	0	0	0	0	0	0	0	0	0	0	0	0	0	0	0	0	0	0	0	0	0	0	0	0	0	0	0	0	0	0	0	0	138466	0	0	0	0	0	0	5470	0	2231	5409	4408	2655	0	0	0
[truncated: 315 more columns]

## Sheet: Supplementary Table 2
Pathogens
Escherichia coli
Pneumocystis jirovecii
Pseudomonas aeruginosa
Stenotrophomonas maltophilia
Acinetobacter baumannii
Acinetobacter calcoaceticus-baumannii
Enterobacter cloaceae complex
Serratia marcescens
Human rhinovirus/Enterovirus
Staphylococcus aureus
Coliform
Klebsiella oxytoca
Alphainfluenzavirus influenzae
Haemophilus influenzae
Moraxella catarrhalis
Streptococcus pneumoniae
Mastadenovirus
Betainfluenzavirus influenzae
Enterobacter cloaceae group
Enterobacter cloacae complex
Klebsiella pneumoniae
Streptococcus pyogenes
Parainfluenza virus
Human metapneumovirus
Klebsiella aerogenes
Respiratory syncytial virus
Citrobacter freundii
Raoultella ornithinolytica
Acinetobacter calcoaceticus-baumannii complex
Proteus spp.
Enterobacter spp.
Citrobacter koseri
Streptococcus agalactiae
Coronavirus
Klebsiella variicola
Morganella morganii
Proteus mirabilis

## Sheet: Supplementary Table 3
sample_id	sequencing_positive	type	sample_type	sample_date	HAP subgroup	biofire_organism	curetis_organism	culture_organism
10_2	TRUE	Bacterial	ETT	2017-10-21	VAP	Klebsiella pneumoniae (10^5);Pseudomonas aeruginosa (>=10^7)	Pseudomonas aeruginosa (+++)	Pseudomonas aeruginosa
10_4	TRUE	Bacterial	ETT	2017-10-21	VAP	Klebsiella pneumoniae (>=10^7);Pseudomonas aeruginosa (>=10^7)	Klebsiella pneumoniae (+++);Pseudomonas aeruginosa (+++);Pneumocystis jirovecii (++)	Pseudomonas aeruginosa
10_5	TRUE	Bacterial	ETT	2017-10-23	VAP	Escherichia coli (10^4);Klebsiella pneumoniae (>=10^7);Pseudomonas aeruginosa (10^6)	Escherichia coli (+++);Klebsiella pneumoniae (++);Pseudomonas aeruginosa (+++)	Klebsiella pneumoniae
10_6	TRUE	Bacterial	ETT	2017-10-23	VAP	Human rhinovirus/Enterovirus	Stenotrophomonas maltophilia (+++)	Stenotrophomonas maltophilia
10_7	TRUE	Bacterial	ETT	2017-10-31	V-HAP	Enterobacter cloaceae complex (10^4);Human rhinovirus/Enterovirus	Negative	Negative
11_1	TRUE	PCR negative	ETT	2017-11-08	V-HAP	Negative	Negative	Negative
11_10	FALSE	RNA virus	SPU	2017-10-21	NV-HAP	Parainfluenza virus	Negative	Negative
11_11	TRUE	PCR negative	ETT	2017-10-23	VAP	Negative	Negative	Negative
11_8	FALSE	Bacterial	ETT	2017-11-08	VAP	Human rhinovirus/Enterovirus	Pneumocystis jirovecii (++)	Negative
11_9	TRUE	Bacterial	SPU	2017-11-07	NV-HAP	Proteus spp. (10^6)	Invalid test	Negative
12_10	FALSE	Only contaminants	BAL	2017-11-14	VAP	Pseudomonas aeruginosa (10^6)	Pseudomonas aeruginosa (+++)	Negative
12_11	FALSE	Only contaminants	ETT	2017-12-09	VAP	Respiratory syncytial virus	Negative	Negative
12_6	FALSE	Only contaminants	ETT	2017-11-15	VAP	Klebsiella oxytoca (>=10^7)	Klebsiella oxytoca (+++)	Coliform
12_8	FALSE	Only contaminants	ETT	2017-12-09	VAP	Human rhinovirus/Enterovirus	Negative	Negative
12_9	FALSE	Only contaminants	ETT	2017-11-15	VAP	Staphylococcus aureus (10^6);Streptococcus agalactiae (10^5)	Staphylococcus aureus (+++)	Negative
13_1	FALSE	RNA virus	ETT	2017-11-28	V-HAP	Human rhinovirus/Enterovirus;Respiratory syncytial virus	Negative	Negative
13_3	TRUE	Bacterial	ETT	2017-12-09	VAP	Acinetobacter calcoaceticus-baumannii (>=10^7);Pseudomonas aeruginosa (>=10^7)	Acinetobacter calcoaceticus-baumannii complex (+++);Pseudomonas aeruginosa (+++)	Pseudomonas aeruginosa;Acinetobacter baumannii
13_4	TRUE	Bacterial	ETT	2017-12-10	V-HAP	Escherichia coli (>=10^7);Proteus spp. (>=10^7)	Escherichia coli (+++);Proteus spp. (+++)	Negative
13_5	TRUE	PCR negative	ETT	2017-12-12	VAP	Negative	Negative	Negative
13_6	TRUE	Bacterial	ETT	2017-11-01	V-HAP	Staphylococcus aureus (>=10^7)	Staphylococcus aureus (+++)	Staphylococcus aureus
15_1	TRUE	Bacterial	ETT	2017-11-07	VAP	Klebsiella pneumoniae (10^4);Pseudomonas aeruginosa (10^6)	Klebsiella pneumoniae (+);Pseudomonas aeruginosa (+++);Stenotrophomonas maltophilia (++)	Negative
15_2	TRUE	Bacterial	ETT	2017-10-28	VAP	Haemophilus influenzae (>=10^7);Staphylococcus aureus (10^5)	Haemophilus influenzae (+++)	Haemophilus influenzae;Staphylococcus aureus
15_3	FALSE	PCR negative	ETT	2017-11-12	V-HAP	Negative	Negative	Negative
15_4	TRUE	Bacterial	ETT	2017-11-08	VAP	Escherichia coli (>=10^7);Pseudomonas aeruginosa (>=10^7)	Escherichia coli (+++);Pseudomonas aeruginosa (+++)	Negative
15_5	TRUE	Bacterial	ETT	2017-11-25	VAP	Negative	Morganella morganii (+)	Negative
15_6	TRUE	Bacterial	ETT	2017-11-26	V-HAP	Pseudomonas aeruginosa (>=10^7)	Pseudomonas aeruginosa (+++)	Pseudomonas aeruginosa
16_10	FALSE	RNA virus	ETT	2018-01-05	VAP	Respiratory syncytial virus	Invalid test	Negative
16_11	FALSE	Bacterial	ETT	2017-10-07	VAP	Haemophilus influenzae (10^5);Serratia marcescens (10^5)	Negative	Negative
16_7	FALSE	Bacterial	ETT	2017-08-05	VAP	Escherichia coli (10^5);Haemophilus influenzae (10^5);Staphylococcus aureus (10^6);Human Adenovirus	Escherichia coli (++);Staphylococcus aureus (+)	Negative
16_8	TRUE	PCR negative	ETT	2017-08-05	V-HAP	Negative	Negative	Negative
16_9	TRUE	Bacterial	SPU	2018-01-02	NV-HAP	Escherichia coli (10^5);Klebsiella pneumoniae (10^5)	Escherichia coli (++);Klebsiella pneumoniae (+)	Klebsiella pneumoniae
18_10	TRUE	PCR negative	BAL	2018-01-23	VAP	Negative	Negative	Negative
18_4	TRUE	Bacterial	ETT	2018-01-17	VAP	Escherichia coli (>=10^7);Klebsiella pneumoniae (10^5)	Escherichia coli (+++);Klebsiella pneumoniae (+)	Negative
18_5	TRUE	PCR negative	ETT	2018-01-20	VAP	Negative	Negative	Negative
18_6	TRUE	Bacterial	SPU	2018-01-20	NV-HAP	Haemophilus influenzae (>=10^7);Moraxella catarrhalis (>=10^7);Streptococcus pneumoniae (>=10^7);Human Adenovirus;Betainfluenzavirus influenzae	Haemophilus influenzae (++);Moraxella catarrhalis (+++)	Haemophilus influenzae
18_8	TRUE	Bacterial	ETT	2018-01-22	VAP	Moraxella catarrhalis (>=10^7);Staphylococcus aureus (10^6)	Haemophilus influenzae (+++);Moraxella catarrhalis (++);Staphylococcus aureus (+++)	Staphylococcus aureus;Haemophilus influenzae
18_9	TRUE	PCR negative	BAL	2018-01-23	VAP	Negative	Negative	Negative
19_1	FALSE	PCR negative	ETT	2017-12-19	V-HAP	Negative	Negative	Negative
19_2	FALSE	PCR negative	SPU	2018-01-16	NV-HAP	Negative	Negative	Negative
19_3	FALSE	Bacterial	ETT	2018-01-04	VAP	Negative	Acinetobacter calcoaceticus-baumannii complex (+)	Negative
19_4	TRUE	PCR negative	BAL	2018-01-04	VAP	Negative	Negative	Negative
19_5	FALSE	Bacterial	ETT	2017-12-14	VAP	Haemophilus influenzae (10^4);Human rhinovirus/Enterovirus	Negative	Negative
19_6	TRUE	Bacterial	ETT	2017-12-18	VAP	Pseudomonas aeruginosa (10^6);Staphylococcus aureus (10^6)	Pseudomonas aeruginosa (+++)	Pseudomonas aeruginosa
20_1	TRUE	Bacterial	ETT	2018-01-17	VAP	Staphylococcus aureus (10^5)	Negative	Negative
20_10	FALSE	PCR negative	ND-BAL	2018-01-28	VAP	Negative	Negative	Negative
20_11	FALSE	Bacterial	ND-BAL	2018-01-28	VAP	Negative	Negative	Proteus mirabilis
20_8	TRUE	RNA virus	ETT	2018-01-16	V-HAP	Alphainfluenzavirus influenzae	Negative	Negative
20_9	TRUE	RNA virus	ETT	2018-01-24	VAP	Betainfluenzavirus influenzae	Negative	Negative
21_1	FALSE	PCR negative	ETT	2018-01-15	V-HAP	Negative	Negative	Negative
21_2	FALSE	Bacterial	ETT	2018-01-05	VAP	Haemophilus influenzae (10^4)	Negative	Negative
21_3	TRUE	Bacterial	ETT	2018-01-11	VAP	Pseudomonas aeruginosa (>=10^7);Streptococcus agalactiae (10^5)	Pseudomonas aeruginosa (+++);Stenotrophomonas maltophilia (+)	Klebsiella pneumoniae;Pseudomonas aeruginosa
21_4	TRUE	Bacterial	ETT	2018-01-16	VAP	Streptococcus pneumoniae (10^5)	Negative	Negative
21_5	FALSE	Bacterial	BAL	2018-01-04	VAP	Streptococcus pneumoniae (10^6);Betainfluenzavirus influenzae;Respiratory syncytial virus	Negative	Streptococcus pneumoniae
21_6	TRUE	Bacterial	ETT	2018-01-08	V-HAP	Escherichia coli (>=10^7)	Escherichia coli (+++)	Escherichia coli
22_10	TRUE	Bacterial	SPU	2018-01-23	NV-HAP	Negative	Citrobacter freundii (+++);Morganella morganii (++)	Negative
22_11	FALSE	RNA virus	SPU	2018-01-27	NV-HAP	Coronavirus	Negative	Negative
22_3	TRUE	Bacterial	SPU	2017-07-31	NV-HAP	Klebsiella oxytoca (10^5);Proteus spp. (>=10^7)	Klebsiella oxytoca (+);Proteus spp. (+++);Stenotrophomonas maltophilia (++)	Negative
22_6	TRUE	Bacterial	ETT	2017-12-19	VAP	Klebsiella pneumoniae (10^4);Pseudomonas aeruginosa (>=10^7)	Pseudomonas aeruginosa (+++)	Pseudomonas aeruginosa
22_8	FALSE	PCR negative	SPU	2018-01-30	NV-HAP	Negative	Negative	Negative
22_9	TRUE	Bacterial	ETT	2017-12-21	V-HAP	Moraxella catarrhalis (10^5);Staphylococcus aureus (10^5);Streptococcus pneumoniae (>=10^7)	Moraxella catarrhalis (+)	Streptococcus pneumoniae
23_2	TRUE	Bacterial	ETT	2018-02-23	VAP	Negative	Citrobacter freundii (++)	Citrobacter freundii
23_3	FALSE	Bacterial	ETT	2018-02-21	VAP	Negative	Stenotrophomonas maltophilia (++)	Stenotrophomonas maltophilia
23_5	TRUE	RNA virus	ETT	2018-02-23	VAP	Coronavirus;Alphainfluenzavirus influenzae	Negative	Negative
23_6	FALSE	PCR negative	ETT	2018-02-24	V-HAP	Negative	Negative	Negative
27_1	TRUE	Bacterial	ETT	2018-03-18	VAP	Enterobacter cloaceae complex (10^5)	Enterobacter cloacae complex (++)	E. cloaceae group
27_2	FALSE	RNA virus	SPU	2018-03-15	NV-HAP	Alphainfluenzavirus influenzae;Betainfluenzavirus influenzae	Negative	Negative
27_3	FALSE	RNA virus	ND-BAL	2018-03-17	VAP	Parainfluenza virus	Negative	Negative
27_4	TRUE	Bacterial	BAL	2018-03-18	VAP	Escherichia coli (10^4)	Negative	Escherichia coli;Staphylococcus aureus
27_5	TRUE	Bacterial	BAL	2018-03-15	V-HAP	Haemophilus influenzae (>=10^7);Streptococcus pneumoniae (>=10^7)	Haemophilus influenzae (+++)	Negative
27_6	FALSE	RNA virus	ETT	2018-03-17	VAP	Alphainfluenzavirus influenzae	Negative	Negative
28_10	FALSE	Only contaminants	ND-BAL	2018-02-14	VAP	Escherichia coli (>=10^7);Pseudomonas aeruginosa (10^6);Staphylococcus aureus (>=10^7);Betainfluenzavirus influenzae	Escherichia coli (+++);Pseudomonas aeruginosa (+++);Staphylococcus aureus (+++)	Pseudomonas aeruginosa
28_11	FALSE	Only contaminants	ETT	2018-02-10	VAP	Escherichia coli (>=10^7);Klebsiella pneumoniae (>=10^7)	Escherichia coli (+++);Klebsiella pneumoniae (++)	Klebsiella pneumoniae;Escherichia coli
28_12	FALSE	Only contaminants	SPU	2018-02-13	NV-HAP	Klebsiella pneumoniae (>=10^7);Staphylococcus aureus (10^5)	Klebsiella pneumoniae (+++);Staphylococcus aureus (++)	Negative
28_7	FALSE	Only contaminants	SPU	2018-02-10	NV-HAP	Alphainfluenzavirus influenzae	Pneumocystis jirovecii (+++)	Negative
28_8	FALSE	Only contaminants	ETT	2018-02-12	VAP	Klebsiella oxytoca (10^6);Staphylococcus aureus (>=10^7)	Klebsiella oxytoca (+++);Staphylococcus aureus (+++);Stenotrophomonas maltophilia (+++)	Staphylococcus aureus;Klebsiella oxytoca
28_9	FALSE	Only contaminants	SPU	2018-02-11	NV-HAP	Pseudomonas aeruginosa (>=10^7);Staphylococcus aureus (10^4)	Pseudomonas aeruginosa (+++)	Pseudomonas aeruginosa
2_10	FALSE	RNA virus	SPU	2017-08-20	NV-HAP	Human rhinovirus/Enterovirus	Negative	Negative
2_11	TRUE	Bacterial	ETT	2017-09-17	VAP	Escherichia coli (>=10^7)	Invalid test	Escherichia coli
2_12	TRUE	Bacterial	SPU	2017-09-16	NV-HAP	Klebsiella pneumoniae (10^4)	Negative	Negative
2_7	TRUE	Bacterial	ETT	2017-08-20	VAP	Pseudomonas aeruginosa (10^5);Human rhinovirus/Enterovirus	Pseudomonas aeruginosa (+++);Stenotrophomonas maltophilia (+)	Pseudomonas aeruginosa
2_8	TRUE	Bacterial	ETT	2017-09-18	VAP	Pseudomonas aeruginosa (>=10^7)	Pseudomonas aeruginosa (+++)	Pseudomonas aeruginosa
2_9	TRUE	Bacterial	ETT	2017-08-19	V-HAP	Haemophilus influenzae (10^4);Pseudomonas aeruginosa (10^6);Staphylococcus aureus (10^4)	Pseudomonas aeruginosa (+++)	Negative
31_1	FALSE	Bacterial	ETT	2018-03-06	VAP	Enterobacter cloaceae complex (10^4);Betainfluenzavirus influenzae	Stenotrophomonas maltophilia (++)	Negative
31_2	TRUE	Bacterial	BAL	2018-03-07	VAP	Staphylococcus aureus (>=10^7);Betainfluenzavirus influenzae	Staphylococcus aureus (+++)	Staphylococcus aureus
31_3	TRUE	Bacterial	ETT	2018-03-07	VAP	Escherichia coli (>=10^7)	Escherichia coli (+++)	Escherichia coli
31_4	TRUE	Bacterial	ETT	2018-03-09	VAP	Invalid test	Pseudomonas aeruginosa (+++);Serratia marcescens (+++)	Negative
31_5	TRUE	Bacterial	ETT	2018-02-21	VAP	Klebsiella oxytoca (10^6);Proteus spp. (10^4);Betainfluenzavirus influenzae	Klebsiella oxytoca (+++);Proteus spp. (+)	Negative
31_6	FALSE	PCR negative	ETT	2018-03-06	VAP	Negative	Negative	Negative
32_10	FALSE	Bacterial	ETT	2018-03-06	V-HAP	Moraxella catarrhalis (10^5);Human rhinovirus/Enterovirus	Negative	Negative
32_11	TRUE	Bacterial	ETT	2018-03-07	VAP	Haemophilus influenzae (10^4);Moraxella catarrhalis (10^4)	Negative	Negative
32_12	TRUE	PCR negative	ETT	2018-03-07	VAP	Negative	Negative	Negative
32_7	TRUE	Bacterial	ETT	2018-03-09	V-HAP	Negative	Acinetobacter calcoaceticus-baumannii complex (+)	Negative
32_8	TRUE	Bacterial	ETT	2018-03-12	VAP	Pseudomonas aeruginosa (10^6);Human rhinovirus/Enterovirus	Pseudomonas aeruginosa (+++)	Pseudomonas aeruginosa
32_9	TRUE	PCR negative	ND-BAL	2018-03-13	V-HAP	Negative	Negative	Negative
33_1	FALSE	Bacterial	ETT	2018-02-07	V-HAP	Negative	Citrobacter freundii (+);Klebsiella oxytoca (+);Stenotrophomonas maltophilia (+++)	Negative
33_2	TRUE	Bacterial	SPU	2018-02-08	NV-HAP	Klebsiella pneumoniae (>=10^7);Staphylococcus aureus (10^5)	Klebsiella pneumoniae (+++);Staphylococcus aureus (+)	Klebsiella pneumoniae
33_3	TRUE	Bacterial	ND-BAL	2018-01-31	VAP	Klebsiella pneumoniae (>=10^7);Pseudomonas aeruginosa (10^6);Streptococcus pneumoniae (10^5);Betainfluenzavirus influenzae	Klebsiella pneumoniae (+++);Pseudomonas aeruginosa (++);Stenotrophomonas maltophilia (++)	Klebsiella pneumoniae;Pseudomonas aeruginosa
33_4	TRUE	Bacterial	ETT	2018-01-11	VAP	Staphylococcus aureus (>=10^7)	Invalid test	Staphylococcus aureus
33_5	TRUE	Bacterial	SPU	2018-02-07	NV-HAP	Enterobacter cloaceae complex (>=10^7);Escherichia coli (>=10^7);Haemophilus influenzae (10^4);Proteus spp. (10^5);Coronavirus	Escherichia coli (+++);Enterobacter cloacae complex (++);Proteus spp. (+)	Negative
33_6	TRUE	Bacterial	SPU	2018-02-11	NV-HAP	Staphylococcus aureus (10^5)	Invalid test	Negative
34_11	FALSE	RNA virus	SPU	2018-02-18	NV-HAP	Human rhinovirus/Enterovirus	Invalid test	Negative
34_12	TRUE	PCR negative	ETT	2018-02-10	VAP	Negative	Negative	Negative
34_7	TRUE	Bacterial	ETT	2018-02-17	V-HAP	Staphylococcus aureus (10^6);Alphainfluenzavirus influenzae	Staphylococcus aureus (++)	Negative
34_8	FALSE	PCR negative	ND-BAL	2018-02-11	VAP	Negative	Negative	Negative
34_9	TRUE	Bacterial	ETT	2018-02-19	VAP	Pseudomonas aeruginosa (10^6);Human rhinovirus/Enterovirus	Pseudomonas aeruginosa (+++)	Negative
35_1	TRUE	RNA virus	ETT	2018-02-21	VAP	Betainfluenzavirus influenzae	Negative	Negative
35_2	TRUE	Bacterial	ND-BAL	2018-02-20	VAP	Escherichia coli (10^4)	Negative	Escherichia coli
35_3	TRUE	Bacterial	ND-BAL	2018-02-20	VAP	Escherichia coli (>=10^7)	Escherichia coli (+++)	Escherichia coli
35_4	TRUE	Bacterial	ETT	2018-02-15	VAP	Invalid test	Klebsiella oxytoca (+++);Staphylococcus aureus (+++)	Negative
35_6	TRUE	Bacterial	ETT	2018-01-06	VAP	Haemophilus influenzae (>=10^7);Proteus spp. (10^5);Betainfluenzavirus influenzae	Haemophilus influenzae (+++);Proteus spp. (++)	Negative
36_10	FALSE	Only contaminants	SPU	2018-03-26	NV-HAP	Escherichia coli (10^5);Haemophilus influenzae (>=10^7);Human rhinovirus/Enterovirus	Haemophilus influenzae (+++)	Haemophilus influenzae;Escherichia coli
36_11	FALSE	Only contaminants	ETT	2017-08-13	VAP	Enterobacter cloaceae complex (10^6);Moraxella catarrhalis (10^4);Staphylococcus aureus (>=10^7)	Staphylococcus aureus (+++)	Staphylococcus aureus
36_12	FALSE	Only contaminants	ETT	2017-08-15	VAP	Pseudomonas aeruginosa (>=10^7)	Pseudomonas aeruginosa (+++)	Pseudomonas aeruginosa
36_7	FALSE	Only contaminants	ETT	2018-02-20	VAP	Klebsiella pneumoniae (>=10^7)	Invalid test	Klebsiella pneumoniae
36_8	FALSE	Only contaminants	ND-BAL	2018-03-21	NV-HAP	Escherichia coli (>=10^7);Pseudomonas aeruginosa (10^4)	Escherichia coli (+++);Pseudomonas aeruginosa (+)	Escherichia coli
36_9	FALSE	Only contaminants	ETT	2018-01-05	VAP	Pseudomonas aeruginosa (>=10^7);Serratia marcescens (10^6)	Pseudomonas aeruginosa (+++);Serratia marcescens (+++)	Pseudomonas aeruginosa
37_1	TRUE	PCR negative	ETT	2018-04-10	VAP	Negative	Negative	Negative
37_2	TRUE	Bacterial	SPU	2018-04-10	NV-HAP	Staphylococcus aureus (10^5);Human rhinovirus/Enterovirus;Parainfluenza virus	Staphylococcus aureus (++)	Staphylococcus aureus
37_3	TRUE	PCR negative	ETT	2018-03-03	VAP	Negative	Negative	Negative
37_4	TRUE	Bacterial	BAL	2018-02-27	NV-HAP	Haemophilus influenzae (>=10^7)	Haemophilus influenzae (+++)	Haemophilus influenzae
37_5	TRUE	Bacterial	BAL	2018-03-04	VAP	Streptococcus pneumoniae (10^4);Betainfluenzavirus influenzae	Negative	Negative
37_6	TRUE	PCR negative	ND-BAL	2018-04-10	VAP	Negative	Negative	Negative
38_1	TRUE	Bacterial	ND-BAL	2018-03-14	VAP	Klebsiella oxytoca (10^5)	Klebsiella oxytoca (++)	;Citrobacter koseri
38_2	FALSE	PCR negative	BAL	2018-03-24	VAP	Negative	Negative	Negative
38_3	FALSE	Bacterial	ETT	2018-03-26	VAP	Negative	Negative	Staphylococcus aureus
38_4	FALSE	PCR negative	ETT	2018-03-20	VAP	Negative	Negative	Negative
38_5	TRUE	Bacterial	ETT	2018-03-20	VAP	Klebsiella oxytoca (10^5);Staphylococcus aureus (10^6)	Klebsiella oxytoca (+++);Staphylococcus aureus (++)	Klebsiella oxytoca
38_6	TRUE	Bacterial	SPU	2018-03-20	NV-HAP	Escherichia coli (10^4);Haemophilus influenzae (>=10^7);Human Adenovirus	Haemophilus influenzae (+++)	Negative
39_1	TRUE	Bacterial	ETT	2018-04-07	VAP	Escherichia coli (10^4);Pseudomonas aeruginosa (>=10^7);Serratia marcescens (10^6)	Invalid test	Pseudomonas aeruginosa
39_2	FALSE	Bacterial	ETT	2018-04-23	VAP	Negative	Citrobacter freundii (+)	Negative
39_3	TRUE	Bacterial	SPU	2018-04-23	NV-HAP	Escherichia coli (10^5);Pseudomonas aeruginosa (>=10^7);Human rhinovirus/Enterovirus	Escherichia coli (++);Pseudomonas aeruginosa (+++)	Negative
39_5	TRUE	Bacterial	ETT	2018-04-26	V-HAP	Pseudomonas aeruginosa (10^6);Staphylococcus aureus (>=10^7)	Pseudomonas aeruginosa (+++);Staphylococcus aureus (+++)	Negative
39_6	TRUE	Bacterial	SPU	2018-04-26	NV-HAP	Staphylococcus aureus (>=10^7)	Staphylococcus aureus (+++)	Staphylococcus aureus
3_1	FALSE	Bacterial	SPU	2017-09-02	NV-HAP	Moraxella catarrhalis (>=10^7)	Negative	Negative
3_2	TRUE	PCR negative	ETT	2017-09-14	V-HAP	Negative	Invalid test	Negative
3_3	TRUE	Bacterial	ETT	2017-09-24	VAP	Negative	Stenotrophomonas maltophilia (+++)	Stenotrophomonas maltophilia
3_4	TRUE	Bacterial	ETT	2017-09-24	VAP	Klebsiella aerogenes (>=10^7);Proteus spp. (10^4);Human rhinovirus/Enterovirus	Negative	Klebsiella aerogenes
3_5	FALSE	PCR negative	ETT	2017-09-29	V-HAP	Negative	Negative	Negative
3_6	TRUE	PCR negative	SPU	2017-09-25	NV-HAP	Negative	Negative	Negative
40_10	TRUE	Bacterial	ND-BAL	2018-04-14	VAP	Klebsiella pneumoniae (10^5)	Negative	Negative
40_11	TRUE	Bacterial	ND-BAL	2018-04-15	VAP	Alphainfluenzavirus influenzae	Stenotrophomonas maltophilia (+++)	Stenotrophomonas maltophilia
40_12	FALSE	Bacterial	SPU	2018-04-15	NV-HAP	Klebsiella pneumoniae (10^5);Alphainfluenzavirus influenzae	Klebsiella pneumoniae (+)	Negative
40_7	TRUE	Bacterial	ETT	2017-09-03	VAP	Negative	Pneumocystis jirovecii (+)	Negative
40_8	TRUE	Bacterial	ETT	2018-04-04	V-HAP	Haemophilus influenzae (10^6);Moraxella catarrhalis (>=10^7);Streptococcus pneumoniae (10^6)	Haemophilus influenzae (+++);Moraxella catarrhalis (+++)	Moraxella catarrhalis;Haemophilus influenzae
40_9	TRUE	PCR negative	BAL	2018-04-05	V-HAP	Negative	Negative	Negative
41_1	FALSE	Only contaminants	ND-BAL	2018-02-18	VAP	Escherichia coli (>=10^7)	Escherichia coli (+++)	Escherichia coli
41_2	FALSE	Bacterial	ND-BAL	2018-03-26	V-HAP	Escherichia coli (>=10^7)	Escherichia coli (+++)	Escherichia coli
41_3	TRUE	Bacterial	ETT	2018-03-04	VAP	Klebsiella aerogenes (10^6);Haemophilus influenzae (10^5);Staphylococcus aureus (>=10^7)	Klebsiella aerogenes (++);Haemophilus influenzae (+);Staphylococcus aureus (+++)	;Citrobacter koseri
41_4	TRUE	Bacterial	BAL	2018-03-25	V-HAP	Haemophilus influenzae (10^5);Staphylococcus aureus (10^6)	Staphylococcus aureus (+++)	Negative
41_5	TRUE	Bacterial	ETT	2018-03-19	VAP	Escherichia coli (>=10^7);Staphylococcus aureus (10^5)	Escherichia coli (+++);Staphylococcus aureus (++);Stenotrophomonas maltophilia (+++)	Escherichia coli;Stenotrophomonas maltophilia
41_6	TRUE	Bacterial	ETT	2018-03-19	V-HAP	Klebsiella pneumoniae (>=10^7)	Klebsiella pneumoniae (+++)	Negative
42_1	TRUE	Bacterial	ETT	2018-04-27	VAP	Escherichia coli (10^6);Klebsiella oxytoca (10^4);Klebsiella pneumoniae (>=10^7)	Escherichia coli (+++);Klebsiella pneumoniae (++);Klebsiella oxytoca (+);Stenotrophomonas maltophilia (++)	Klebsiella pneumoniae
42_2	TRUE	Bacterial	ETT	2018-05-03	VAP	Invalid test	Invalid test	Klebsiella oxytoca
42_3	TRUE	Bacterial	ETT	2018-05-03	VAP	Klebsiella aerogenes (>=10^7)	Klebsiella aerogenes (+++)	Klebsiella aerogenes
42_4	TRUE	PCR negative	ETT	2018-05-03	V-HAP	Negative	Negative	Negative
42_5	TRUE	PCR negative	ND-BAL	2018-04-28	VAP	Negative	Invalid test	Negative
42_6	FALSE	RNA virus	SPU	2018-04-27	NV-HAP	Human metapneumovirus	Negative	Negative
43_10	TRUE	PCR negative	ND-BAL	2018-05-15	VAP	Negative	Negative	Negative
43_11	FALSE	RNA virus	ETT	2018-05-10	V-HAP	Human metapneumovirus	Invalid test	Negative
43_7	TRUE	Bacterial	BAL	2018-05-14	V-HAP	Escherichia coli (10^4)	Escherichia coli (+)	Escherichia coli
43_8	TRUE	RNA virus	BAL	2018-05-14	VAP	Alphainfluenzavirus influenzae	Negative	Negative
43_9	TRUE	PCR negative	BAL	2018-05-14	V-HAP	Negative	Negative	Negative
44_10	TRUE	Bacterial	ETT	2018-05-20	VAP	Haemophilus influenzae (10^4)	Invalid test	Negative
44_11	FALSE	PCR negative	ETT	2018-05-20	VAP	Negative	Negative	Negative
44_12	TRUE	Bacterial	SPU	2018-05-17	NV-HAP	Staphylococcus aureus (10^6)	Staphylococcus aureus (++)	Negative
44_7	FALSE	PCR negative	ETT	2018-05-15	VAP	Negative	Negative	Negative
44_8	TRUE	Bacterial	ETT	2018-05-16	VAP	Klebsiella oxytoca (10^5)	Klebsiella oxytoca (+++)	Negative
44_9	TRUE	PCR negative	ETT	2018-05-20	V-HAP	Negative	Negative	Negative
45_1	TRUE	Bacterial	ND-BAL	2018-05-12	VAP	Klebsiella pneumoniae (>=10^7);Moraxella catarrhalis (>=10^7)	Klebsiella pneumoniae (+++);Moraxella catarrhalis (+++)	Moraxella catarrhalis;Escherichia coli
45_2	TRUE	Bacterial	SPU	2018-05-14	NV-HAP	Staphylococcus aureus (>=10^7)	Staphylococcus aureus (+++)	Staphylococcus aureus
45_3	TRUE	Bacterial	SPU	2018-05-13	NV-HAP	Escherichia coli (10^6);Klebsiella pneumoniae (10^5);Streptococcus agalactiae (>=10^7)	Escherichia coli (+++);Klebsiella pneumoniae (+);Stenotrophomonas maltophilia (++)	Negative
45_4	TRUE	Bacterial	SPU	2018-05-13	NV-HAP	Staphylococcus aureus (>=10^7);Human rhinovirus/Enterovirus	Staphylococcus aureus (+++)	Staphylococcus aureus
45_5	TRUE	Bacterial	ETT	2018-05-20	VAP	Enterobacter cloaceae complex (10^5);Klebsiella pneumoniae (10^5)	Enterobacter cloacae complex (+);Klebsiella pneumoniae (+)	Negative
45_6	TRUE	Bacterial	ETT	2018-05-21	VAP	Klebsiella oxytoca (10^6);Staphylococcus aureus (10^6)	Invalid test	Staphylococcus aureus
46_1	FALSE	Bacterial	ETT	2018-05-20	VAP	Escherichia coli (10^4);Haemophilus influenzae (10^4)	Escherichia coli (++)	Negative
46_2	TRUE	Bacterial	ND-BAL	2018-05-20	VAP	Klebsiella oxytoca (10^4)	Negative	Klebsiella oxytoca
46_3	TRUE	PCR negative	ETT	2018-05-03	V-HAP	Negative	Negative	Negative
46_4	TRUE	Bacterial	ETT	2018-05-22	V-HAP	Enterobacter cloaceae complex (10^4);Human rhinovirus/Enterovirus	Negative	Negative
46_5	FALSE	PCR negative	ETT	2018-05-23	V-HAP	Negative	Negative	Negative
46_6	FALSE	PCR negative	ETT	2018-05-23	VAP	Negative	Negative	Negative
47_10	TRUE	RNA virus	SPU	2018-05-05	NV-HAP	Human metapneumovirus	Negative	Negative
47_11	TRUE	Bacterial	SPU	2018-05-07	NV-HAP	Escherichia coli (>=10^7);Pseudomonas aeruginosa (>=10^7)	Escherichia coli (+++);Morganella morganii (+++);Pseudomonas aeruginosa (+++)	Pseudomonas aeruginosa
47_7	TRUE	Bacterial	ETT	2018-05-27	VAP	Klebsiella oxytoca (10^4)	Citrobacter freundii (++);Klebsiella oxytoca (+)	Citrobacter freundii
47_8	TRUE	Bacterial	ETT	2018-05-24	V-HAP	Staphylococcus aureus (>=10^7);Human rhinovirus/Enterovirus	Staphylococcus aureus (+++)	Staphylococcus aureus
47_9	TRUE	Bacterial	ETT	2018-05-04	VAP	Klebsiella pneumoniae (10^5)	Klebsiella pneumoniae (+)	Negative
48_1	TRUE	Bacterial	ND-BAL	2018-02-21	VAP	Enterobacter cloaceae complex (10^5);Alphainfluenzavirus influenzae	Enterobacter cloacae complex (++)	E. cloaceae group
48_2	TRUE	Bacterial	ETT	2017-08-31	VAP	Enterobacter cloaceae complex (10^4)	Negative	Negative
48_3	TRUE	PCR negative	ETT	2017-04-20	VAP	Negative	Negative	Negative
48_4	FALSE	RNA virus	ETT	2017-04-26	VAP	Alphainfluenzavirus influenzae	Negative	Negative
48_5	FALSE	PCR negative	ETT	2018-02-27	VAP	Negative	Negative	Negative
48_6	FALSE	RNA virus	ETT	2018-04-25	VAP	Parainfluenza virus	Negative	Negative
49_10	TRUE	Bacterial	SPU	2018-03-26	NV-HAP	Moraxella catarrhalis (>=10^7);Streptococcus pyogenes (10^5)	Moraxella catarrhalis (++)	Moraxella catarrhalis;Klebsiella pneumoniae
49_11	FALSE	PCR negative	SPU	2018-03-18	NV-HAP	Negative	Negative	Negative
49_12	TRUE	Bacterial	ETT	2018-04-08	VAP	Invalid test	Invalid test	Staphylococcus aureus
49_7	TRUE	Bacterial	ETT	2018-02-22	VAP	Klebsiella pneumoniae (10^6)	Klebsiella pneumoniae (+)	;Raoultella ornithinolytica;Klebsiella pneumoniae
49_8	TRUE	Bacterial	ND-BAL	2018-04-09	VAP	Escherichia coli (10^6);Klebsiella pneumoniae (10^5);Staphylococcus aureus (>=10^7)	Escherichia coli (+++);Klebsiella pneumoniae (+);Staphylococcus aureus (+++)	Staphylococcus aureus;Escherichia coli
49_9	TRUE	Bacterial	ETT	2018-03-18	VAP	Pseudomonas aeruginosa (10^6)	Pseudomonas aeruginosa (+++)	Pseudomonas aeruginosa
4_10	TRUE	PCR negative	ETT	2017-10-01	V-HAP	Negative	Negative	Negative
4_7	TRUE	Bacterial	ETT	2017-10-03	VAP	Escherichia coli (10^4)	Pneumocystis jirovecii (++)	Negative
4_8	TRUE	PCR negative	ETT	2017-10-01	VAP	Negative	Negative	Negative
4_9	TRUE	Bacterial	ETT	2017-10-04	V-HAP	Enterobacter cloaceae complex (10^5);Staphylococcus aureus (10^6)	Enterobacter cloacae complex (+);Staphylococcus aureus (++)	Staphylococcus aureus
50_10	FALSE	RNA virus	ETT	2018-05-02	VAP	Human rhinovirus/Enterovirus	Negative	Negative
50_6	TRUE	RNA virus	SPU	2018-05-02	NV-HAP	Human metapneumovirus	Negative	Negative
50_7	FALSE	RNA virus	ETT	2018-05-03	V-HAP	Human rhinovirus/Enterovirus	Negative	Negative
50_8	FALSE	Bacterial	SPU	2018-04-29	NV-HAP	Escherichia coli (>=10^7)	Escherichia coli (+++)	Negative
50_9	TRUE	PCR negative	SPU	2018-05-02	NV-HAP	Negative	Negative	Negative
51_10	TRUE	Bacterial	SPU	2018-05-29	NV-HAP	Escherichia coli (>=10^7);Pseudomonas aeruginosa (10^6);Staphylococcus aureus (10^4);Parainfluenza virus	Escherichia coli (+++);Pseudomonas aeruginosa (+++)	Escherichia coli
51_6	TRUE	Bacterial	SPU	2018-05-09	NV-HAP	Escherichia coli (10^5);Staphylococcus aureus (>=10^7)	Escherichia coli (++);Staphylococcus aureus (+++)	Staphylococcus aureus;Coliform
51_7	TRUE	Bacterial	ETT	2018-05-09	VAP	Klebsiella pneumoniae (>=10^7);Serratia marcescens (10^6);Parainfluenza virus	Klebsiella pneumoniae (+++)	Klebsiella pneumoniae
51_8	TRUE	Bacterial	ETT	2018-05-12	VAP	Pseudomonas aeruginosa (10^5);Human Adenovirus	Invalid test	Pseudomonas aeruginosa
5_2	TRUE	Bacterial	ETT	2017-08-21	VAP	Pseudomonas aeruginosa (>=10^7);Human rhinovirus/Enterovirus	Pseudomonas aeruginosa (+++);Stenotrophomonas maltophilia (+++)	Pseudomonas aeruginosa
5_3	FALSE	PCR negative	SPU	2017-08-22	NV-HAP	Negative	Negative	Negative
5_4	TRUE	Bacterial	ETT	2017-08-23	V-HAP	Enterobacter cloaceae complex (>=10^7);Escherichia coli (>=10^7)	Escherichia coli (+++);Klebsiella aerogenes (+)	Negative
5_5	TRUE	Bacterial	ETT	2017-08-30	VAP	Haemophilus influenzae (>=10^7)	Haemophilus influenzae (+++)	Negative
5_6	TRUE	Bacterial	SPU	2017-08-29	NV-HAP	Acinetobacter calcoaceticus-baumannii (10^6);Enterobacter cloaceae complex (>=10^7);Parainfluenza virus	Acinetobacter calcoaceticus-baumannii complex (++);Enterobacter cloacae complex (+++)	Enterobacter spp.
5_8	TRUE	Bacterial	ETT	2017-08-31	VAP	Escherichia coli (10^4);Pseudomonas aeruginosa (>=10^7)	Pseudomonas aeruginosa (+++)	Negative
6_10	FALSE	Only contaminants	ETT	2017-10-09	VAP	Enterobacter cloaceae complex (10^6);Haemophilus influenzae (10^4)	Enterobacter cloacae complex (++)	Negative
6_11	FALSE	PCR negative	SPU	2017-01-14	NV-HAP	Negative	Negative	Negative
6_4	FALSE	Only contaminants	ETT	2017-10-17	VAP	Escherichia coli (>=10^7)	Escherichia coli (+++)	Escherichia coli
6_5	FALSE	Only contaminants	ETT	2017-10-15	VAP	Pseudomonas aeruginosa (>=10^7)	Pseudomonas aeruginosa (+++);Stenotrophomonas maltophilia (+++)	Negative
6_8	FALSE	Only contaminants	ETT	2017-10-14	V-HAP	Human rhinovirus/Enterovirus	Invalid test	Negative
6_9	FALSE	Only contaminants	SPU	2017-10-07	NV-HAP	Human rhinovirus/Enterovirus	Negative	Negative
7_1	TRUE	Bacterial	ETT	2017-11-07	V-HAP	Human rhinovirus/Enterovirus	Negative	;Citrobacter koseri
7_2	TRUE	Bacterial	ETT	2017-11-13	VAP	Enterobacter cloaceae complex (10^4);Pseudomonas aeruginosa (>=10^7)	Pseudomonas aeruginosa (+++)	Pseudomonas aeruginosa
7_3	TRUE	Bacterial	ETT	2017-11-14	VAP	Enterobacter cloaceae complex (10^6);Klebsiella oxytoca (>=10^7)	Enterobacter cloacae complex (++);Klebsiella oxytoca (+++)	Klebsiella oxytoca
7_4	FALSE	PCR negative	ETT	2017-11-15	VAP	Negative	Invalid test	Negative
7_5	TRUE	Bacterial	ETT	2017-11-20	VAP	Acinetobacter calcoaceticus-baumannii (>=10^7);Enterobacter cloaceae complex (10^5);Pseudomonas aeruginosa (>=10^7)	Invalid test	Acinetobacter baumannii
7_6	TRUE	Bacterial	SPU	2017-11-20	NV-HAP	Enterobacter cloaceae complex (10^6);Klebsiella pneumoniae (10^5);Pseudomonas aeruginosa (10^6);Staphylococcus aureus (10^6)	Invalid test	Staphylococcus aureus
8_1	TRUE	Bacterial	SPU	2017-08-15	NV-HAP	Pseudomonas aeruginosa (10^4);Staphylococcus aureus (>=10^7)	Staphylococcus aureus (+++)	Staphylococcus aureus
8_2	FALSE	Bacterial	ETT	2017-08-17	V-HAP	Enterobacter cloaceae complex (>=10^7);Klebsiella pneumoniae (10^5);Pseudomonas aeruginosa (10^6)	Enterobacter cloacae complex (+);Klebsiella variicola (+);Pseudomonas aeruginosa (+++)	Negative
8_3	TRUE	Bacterial	ETT	2017-10-05	VAP	Klebsiella oxytoca (10^4);Staphylococcus aureus (10^5)	Invalid test	Staphylococcus aureus
8_4	TRUE	Bacterial	SPU	2017-10-25	NV-HAP	Pseudomonas aeruginosa (>=10^7)	Pseudomonas aeruginosa (+++)	Pseudomonas aeruginosa
8_5	TRUE	Bacterial	ETT	2017-11-26	V-HAP	Haemophilus influenzae (10^6);Moraxella catarrhalis (10^5);Streptococcus agalactiae (10^5)	Haemophilus influenzae (+++);Moraxella catarrhalis (+)	Negative
8_6	FALSE	Bacterial	ETT	2017-08-15	VAP	Escherichia coli (10^5)	Escherichia coli (+)	Negative
9_1	TRUE	Bacterial	ETT	2017-10-08	VAP	Staphylococcus aureus (>=10^7)	Staphylococcus aureus (++)	Staphylococcus aureus
9_3	TRUE	PCR negative	SPU	2017-10-29	NV-HAP	Negative	Negative	Negative
9_4	TRUE	Bacterial	ETT	2017-11-24	VAP	Staphylococcus aureus (10^4);Alphainfluenzavirus influenzae	Staphylococcus aureus (++)	Negative
9_5	TRUE	PCR negative	ETT	2017-11-25	VAP	Negative	Negative	Negative
9_6	TRUE	Bacterial	ETT	2017-10-10	VAP	Haemophilus influenzae (10^6);Streptococcus pneumoniae (10^4)	Negative	Negative

## Sheet: Supplementary Table 4
genome_name	MLST_type	species	sample_id	checkm2_completeness	checkm2_contamination	genome_size	completeness_model_used	contig_n50
INHALE_FRESH_33-barcode05-bins.1	36	Escherichia coli	33_5	29.98	0.08	1279382	Neural Network (Specific Model)	374514
INHALE_FRESH_35-barcode03-bins.1	-	Escherichia coli	35_3	100	0.02	5129297	Neural Network (Specific Model)	566335
INHALE_FRESH_36-barcode08-bins.1	-	Escherichia coli	36_8	100	0.47	4819652	Neural Network (Specific Model)	552869
INHALE_FRESH_41-barcode01-bins.1	35	Escherichia coli	41_1	100	0.28	4850261	Neural Network (Specific Model)	402003
INHALE_FRESH_41-barcode02-bins.3	-	Escherichia coli
INHALE_FRESH_41-barcode05-bins.17	-	Escherichia coli	41_5	69.09	0.86	1278153	Gradient Boost (General Model)	89582
SAMEA5226450	-	Escherichia coli
SAMEA5226454	477	Escherichia coli
SAMEA5226465	-	Escherichia coli
SAMEA5226466	692	Escherichia coli
SAMEA5226471	692	Escherichia coli
SAMEA5226476	692	Escherichia coli
SAMEA6451093	-	Escherichia coli
SAMEA6451096	866	Escherichia coli
SAMEA6451097	-	Escherichia coli
SAMEA6451100	477	Escherichia coli
SAMEA6451106	471	Escherichia coli
SAMEA6451114	58	Escherichia coli
SAMEA6451116	692	Escherichia coli
SAMEA6451147	44	Escherichia coli
SAMEA6451156	-	Escherichia coli
SAMEA6451159	572	Escherichia coli
SAMEA6451161	2	Escherichia coli
SAMEA6451163	87	Escherichia coli
SAMEA6451169	-	Escherichia coli
SAMN04554948	481	Escherichia coli
SAMN05003922	563	Escherichia coli
SAMN05003947	563	Escherichia coli
SAMN05003948	-	Escherichia coli
SAMN05003977	563	Escherichia coli
SAMN05003983	563	Escherichia coli
SAMN05004005	563	Escherichia coli
SAMN05004021	563	Escherichia coli
SAMN05004026	-	Escherichia coli
SAMN05004031	-	Escherichia coli
SAMN05004053	563	Escherichia coli
SAMN05004245	563	Escherichia coli
SAMN05004249	563	Escherichia coli
SAMN05004274	563	Escherichia coli
SAMN05004309	563	Escherichia coli
SAMN05004310	563	Escherichia coli
SAMN05004319	563	Escherichia coli
SAMN05004326	563	Escherichia coli
SAMN05004329	563	Escherichia coli
SAMN05004344	563	Escherichia coli
SAMN05004379	563	Escherichia coli
SAMN05004420	563	Escherichia coli
SAMN05004431	563	Escherichia coli
SAMN05004447	563	Escherichia coli
SAMN05004455	563	Escherichia coli
SAMN05004496	563	Escherichia coli
SAMN05004517	563	Escherichia coli
SAMN05163685	506	Escherichia coli
SAMN05163686	43	Escherichia coli
SAMN05163687	-	Escherichia coli
SAMN05163688	2	Escherichia coli
SAMN05163689	666	Escherichia coli
SAMN05163690	809	Escherichia coli
SAMN05163691	-	Escherichia coli
SAMN05163692	8	Escherichia coli
SAMN05163694	350	Escherichia coli
SAMN05163695	415	Escherichia coli
SAMN05163697	917	Escherichia coli
SAMN05163698	-	Escherichia coli
SAMN05163699	1019	Escherichia coli
SAMN05163700	816	Escherichia coli
SAMN05163701	481	Escherichia coli
SAMN05163702	481	Escherichia coli
SAMN05163703	-	Escherichia coli
SAMN05163704	4	Escherichia coli
SAMN05163705	350	Escherichia coli
SAMN05163707	-	Escherichia coli
SAMN05163708	638	Escherichia coli
SAMN05163709	-	Escherichia coli
SAMN05163710	506	Escherichia coli
SAMN05163712	43	Escherichia coli
SAMN05163713	-	Escherichia coli
SAMN05163715	43	Escherichia coli
SAMN05163716	570	Escherichia coli
SAMN05163718	-	Escherichia coli
SAMN05163719	-	Escherichia coli
SAMN05163720	55	Escherichia coli
SAMN05163722	-	Escherichia coli
SAMN05163723	43	Escherichia coli
SAMN05163724	52	Escherichia coli
SAMN05163725	339	Escherichia coli
SAMN05163727	-	Escherichia coli
SAMN05163728	-	Escherichia coli
SAMN05163732	-	Escherichia coli
SAMN05163733	4	Escherichia coli
SAMN05163736	895	Escherichia coli
SAMN05163737	546	Escherichia coli
SAMN05163738	350	Escherichia coli
SAMN05163740	917	Escherichia coli
SAMN05163742	24	Escherichia coli
SAMN05163743	524	Escherichia coli
SAMN05163745	126	Escherichia coli
SAMN05163747	-	Escherichia coli
SAMN05163749	48	Escherichia coli
SAMN05163751	-	Escherichia coli
SAMN05163752	767	Escherichia coli
SAMN05163753	-	Escherichia coli
SAMN05163754	300	Escherichia coli
SAMN05163755	-	Escherichia coli
SAMN05163756	205	Escherichia coli
SAMN05163758	-	Escherichia coli
SAMN05163759	4	Escherichia coli
SAMN05163762	415	Escherichia coli
SAMN05163763	-	Escherichia coli
SAMN05163765	-	Escherichia coli
SAMN05163767	-	Escherichia coli
SAMN05163768	48	Escherichia coli
SAMN05163769	126	Escherichia coli
SAMN05163770	-	Escherichia coli
SAMN05163772	1	Escherichia coli
SAMN05163773	-	Escherichia coli
SAMN05163774	-	Escherichia coli
SAMN05163776	-	Escherichia coli
SAMN05163778	34	Escherichia coli
SAMN05163779	350	Escherichia coli
SAMN05163780	130	Escherichia coli
SAMN05163781	-	Escherichia coli
SAMN05163782	553	Escherichia coli
SAMN05163783	-	Escherichia coli
SAMN05163784	-	Escherichia coli
SAMN05163785	-	Escherichia coli
SAMN05163786	165	Escherichia coli
SAMN05163788	483	Escherichia coli
SAMN05163789	-	Escherichia coli
SAMN05163791	-	Escherichia coli
SAMN05163792	-	Escherichia coli
SAMN05163793	-	Escherichia coli
SAMN05163794	483	Escherichia coli
SAMN05163795	-	Escherichia coli
SAMN05163796	3	Escherichia coli
SAMN05163798	404	Escherichia coli
SAMN05163800	-	Escherichia coli
SAMN05163801	-	Escherichia coli
SAMN05163803	664	Escherichia coli
SAMN05163806	-	Escherichia coli
SAMN05163807	-	Escherichia coli
SAMN05163809	483	Escherichia coli
SAMN05163810	130	Escherichia coli
SAMN05163811	7	Escherichia coli
SAMN05163812	481	Escherichia coli
SAMN05163814	-	Escherichia coli
SAMN05163815	6	Escherichia coli
SAMN05170563	-	Escherichia coli
SAMN05170574	3	Escherichia coli
SAMN05170590	-	Escherichia coli
SAMN05170592	570	Escherichia coli
SAMN05170657	-	Escherichia coli
SAMN05170679	350	Escherichia coli
SAMN05170802	33	Escherichia coli
SAMN05170804	511	Escherichia coli
SAMN05170812	367	Escherichia coli
SAMN05170816	478	Escherichia coli
SAMN05170820	8	Escherichia coli
SAMN05170834	43	Escherichia coli
SAMN05170846	-	Escherichia coli
SAMN05170873	481	Escherichia coli
SAMN05170882	-	Escherichia coli
SAMN05170898	43	Escherichia coli
SAMN05170899	829	Escherichia coli
SAMN05170920	-	Escherichia coli
SAMN05170948	-	Escherichia coli
SAMN05170949	-	Escherichia coli
SAMN05170951	350	Escherichia coli
SAMN05170961	-	Escherichia coli
SAMN05171027	-	Escherichia coli
SAMN05171043	481	Escherichia coli
SAMN05171051	8	Escherichia coli
SAMN05171058	43	Escherichia coli
SAMN05171108	506	Escherichia coli
SAMN05171814	-	Escherichia coli
SAMN05171843	3	Escherichia coli
SAMN05171846	43	Escherichia coli
SAMN05171921	350	Escherichia coli
SAMN05356483	481	Escherichia coli
SAMN05356589	43	Escherichia coli
SAMN05356594	-	Escherichia coli
SAMN05356597	563	Escherichia coli
SAMN05356598	-	Escherichia coli
SAMN05356607	563	Escherichia coli
SAMN05356722	628	Escherichia coli
SAMN05356723	-	Escherichia coli
SAMN05356727	-	Escherichia coli
SAMN05356737	628	Escherichia coli
SAMN05750680	788	Escherichia coli
SAMN05750682	628	Escherichia coli
SAMN05750691	-	Escherichia coli
SAMN05750715	-	Escherichia coli
SAMN05750731	-	Escherichia coli
SAMN05750747	350	Escherichia coli
SAMN05750749	895	Escherichia coli
SAMN05750758	-	Escherichia coli
SAMN05750785	628	Escherichia coli
SAMN05750801	-	Escherichia coli
SAMN05750804	-	Escherichia coli
SAMN05750819	-	Escherichia coli
SAMN05750820	-	Escherichia coli
SAMN05750869	366	Escherichia coli
SAMN05964144	628	Escherichia coli
SAMN05964145	563	Escherichia coli
SAMN05964151	-	Escherichia coli
SAMN05964153	-	Escherichia coli
SAMN05964161	-	Escherichia coli
SAMN05964164	-	Escherichia coli
SAMN05964188	415	Escherichia coli
SAMN05964216	-	Escherichia coli
SAMN05964674	628	Escherichia coli
SAMN05964792	-	Escherichia coli
SAMN05965249	1019	Escherichia coli
SAMN05965250	-	Escherichia coli
SAMN05965251	-	Escherichia coli
SAMN05965252	563	Escherichia coli
SAMN05965255	481	Escherichia coli
SAMN05965257	415	Escherichia coli
SAMN05965258	628	Escherichia coli
SAMN05965279	563	Escherichia coli
SAMN05965310	628	Escherichia coli
SAMN05965317	-	Escherichia coli
SAMN05965319	563	Escherichia coli
SAMN05965324	-	Escherichia coli
SAMN05965329	-	Escherichia coli
SAMN05965352	628	Escherichia coli
SAMN05965358	21	Escherichia coli
SAMN05965363	563	Escherichia coli
SAMN05965367	4	Escherichia coli
SAMN05965382	-	Escherichia coli
SAMN05965413	-	Escherichia coli
SAMN05965416	-	Escherichia coli
SAMN05965419	666	Escherichia coli
SAMN05965425	8	Escherichia coli
SAMN05965434	563	Escherichia coli
SAMN05965436	-	Escherichia coli
SAMN05965442	350	Escherichia coli
SAMN05965443	563	Escherichia coli
SAMN05965448	628	Escherichia coli
SAMN05965452	563	Escherichia coli
SAMN05965454	-	Escherichia coli
SAMN05965471	816	Escherichia coli
SAMN05965476	-	Escherichia coli
SAMN05965479	262	Escherichia coli
SAMN05965492	628	Escherichia coli
SAMN05965493	-	Escherichia coli
SAMN05965494	6	Escherichia coli
SAMN05965498	-	Escherichia coli
SAMN05965505	563	Escherichia coli
SAMN05965506	628	Escherichia coli
SAMN05965508	-	Escherichia coli
SAMN05965510	481	Escherichia coli
SAMN05965532	628	Escherichia coli
SAMN05965542	506	Escherichia coli
SAMN05965548	563	Escherichia coli
SAMN05965566	-	Escherichia coli
SAMN05965567	628	Escherichia coli
SAMN05965572	-	Escherichia coli
SAMN05965574	628	Escherichia coli
SAMN05965577	546	Escherichia coli
SAMN05965582	563	Escherichia coli
SAMN05965585	628	Escherichia coli
SAMN05965588	52	Escherichia coli
SAMN05965590	350	Escherichia coli
SAMN05965602	-	Escherichia coli
SAMN05965608	481	Escherichia coli
SAMN05965614	-	Escherichia coli
SAMN05965621	-	Escherichia coli
SAMN05965624	367	Escherichia coli
SAMN05965625	563	Escherichia coli
SAMN05965632	350	Escherichia coli
SAMN05965636	-	Escherichia coli
SAMN05965645	-	Escherichia coli
SAMN05965651	563	Escherichia coli
SAMN05965654	563	Escherichia coli
SAMN05965661	-	Escherichia coli
SAMN05965664	35	Escherichia coli
SAMN05965665	-	Escherichia coli
SAMN05965670	-	Escherichia coli
SAMN05965674	481	Escherichia coli
SAMN05965675	998	Escherichia coli
SAMN05965698	350	Escherichia coli
SAMN05965701	-	Escherichia coli
SAMN05965703	-	Escherichia coli
SAMN05965709	-	Escherichia coli
SAMN05965725	562	Escherichia coli
SAMN05965730	-	Escherichia coli
SAMN05965731	628	Escherichia coli
SAMN05965735	-	Escherichia coli
SAMN05965742	367	Escherichia coli
SAMN05965749	628	Escherichia coli
SAMN05965751	481	Escherichia coli
SAMN05965767	350	Escherichia coli
SAMN05965768	481	Escherichia coli
SAMN05965774	563	Escherichia coli
SAMN05965777	563	Escherichia coli
SAMN05965790	-	Escherichia coli
SAMN05965803	-	Escherichia coli
SAMN05965824	-	Escherichia coli
SAMN05965842	-	Escherichia coli
SAMN05965848	628	Escherichia coli
SAMN05965865	-	Escherichia coli
SAMN05965867	563	Escherichia coli
SAMN05965870	-	Escherichia coli
SAMN05965871	-	Escherichia coli
SAMN05966215	-	Escherichia coli
SAMN05966217	628	Escherichia coli
SAMN05966219	-	Escherichia coli
SAMN05966225	-	Escherichia coli
SAMN05966228	-	Escherichia coli
SAMN05966232	-	Escherichia coli
SAMN05966234	563	Escherichia coli
SAMN05966241	-	Escherichia coli
SAMN05966251	481	Escherichia coli
SAMN05966256	400	Escherichia coli
SAMN05966276	563	Escherichia coli
SAMN05966281	-	Escherichia coli
SAMN05966287	628	Escherichia coli
SAMN05966296	130	Escherichia coli
SAMN05966306	-	Escherichia coli
SAMN05966308	-	Escherichia coli
SAMN05966552	-	Escherichia coli
SAMN05966624	628	Escherichia coli
SAMN05966625	675	Escherichia coli
SAMN05966631	-	Escherichia coli
SAMN05966634	-	Escherichia coli
SAMN05966636	446	Escherichia coli
SAMN05966642	-	Escherichia coli
SAMN05966648	-	Escherichia coli
SAMN05966649	420	Escherichia coli
SAMN05966651	-	Escherichia coli
SAMN05966660	558	Escherichia coli
SAMN05966665	-	Escherichia coli
SAMN05966676	628	Escherichia coli
SAMN05966677	-	Escherichia coli
SAMN05966678	481	Escherichia coli
SAMN05966703	-	Escherichia coli
SAMN05966711	628	Escherichia coli
SAMN05966727	1	Escherichia coli
SAMN05966751	-	Escherichia coli
SAMN05966752	628	Escherichia coli
SAMN05966753	628	Escherichia coli
SAMN05966756	-	Escherichia coli
SAMN05966758	-	Escherichia coli
SAMN05966759	-	Escherichia coli
SAMN05966767	628	Escherichia coli
SAMN05966784	896	Escherichia coli
SAMN05966796	501	Escherichia coli
SAMN05966799	5	Escherichia coli
SAMN05966802	563	Escherichia coli
SAMN05966804	-	Escherichia coli
SAMN05966812	-	Escherichia coli
SAMN05966814	-	Escherichia coli
SAMN05966819	628	Escherichia coli
SAMN05966822	-	Escherichia coli
SAMN05966826	6	Escherichia coli
SAMN05966833	367	Escherichia coli
SAMN05966839	-	Escherichia coli
SAMN05966840	-	Escherichia coli
SAMN05966841	-	Escherichia coli
SAMN05966852	628	Escherichia coli
SAMN05966856	1010	Escherichia coli
SAMN05966861	553	Escherichia coli
SAMN05966863	155	Escherichia coli
SAMN05966864	-	Escherichia coli
SAMN05966883	481	Escherichia coli
SAMN05966898	563	Escherichia coli
SAMN05966899	481	Escherichia coli
SAMN05966902	-	Escherichia coli
SAMN05980089	700	Escherichia coli
SAMN05980185	-	Escherichia coli
SAMN05980206	-	Escherichia coli
SAMN05980210	-	Escherichia coli
SAMN05980227	350	Escherichia coli
SAMN05980233	-	Escherichia coli
SAMN05980238	1019	Escherichia coli
SAMN05980240	483	Escherichia coli
SAMN05980241	563	Escherichia coli
SAMN05980243	-	Escherichia coli
SAMN05980244	-	Escherichia coli
SAMN05980249	1	Escherichia coli
SAMN05980255	570	Escherichia coli
SAMN05980257	-	Escherichia coli
SAMN05980260	1118	Escherichia coli
SAMN05980268	420	Escherichia coli
SAMN05980272	-	Escherichia coli
SAMN05980275	628	Escherichia coli
SAMN05980282	1019	Escherichia coli
SAMN05980283	2	Escherichia coli
SAMN05980300	-	Escherichia coli
SAMN05980303	809	Escherichia coli
SAMN05980304	-	Escherichia coli
SAMN05980398	563	Escherichia coli
SAMN05980403	1019	Escherichia coli
SAMN05980410	35	Escherichia coli
SAMN05980412	-	Escherichia coli
SAMN05980415	563	Escherichia coli
SAMN05980416	-	Escherichia coli
SAMN05980419	563	Escherichia coli
SAMN05980428	628	Escherichia coli
SAMN05980429	1092	Escherichia coli
SAMN05980445	728	Escherichia coli
SAMN05980449	546	Escherichia coli
SAMN05980451	628	Escherichia coli
SAMN05980458	-	Escherichia coli
SAMN05980469	563	Escherichia coli
SAMN05980470	-	Escherichia coli
SAMN05980472	-	Escherichia coli
SAMN05980473	-	Escherichia coli
SAMN05980491	628	Escherichia coli
SAMN05980493	628	Escherichia coli
SAMN05980494	-	Escherichia coli
SAMN05980501	-	Escherichia coli
SAMN05980503	563	Escherichia coli
SAMN05980508	1118	Escherichia coli
SAMN05980514	-	Escherichia coli
SAMN05980517	-	Escherichia coli
SAMN05980518	-	Escherichia coli
SAMN05980520	570	Escherichia coli
SAMN05980522	-	Escherichia coli
SAMN05980527	-	Escherichia coli
SAMN05980539	-	Escherichia coli
SAMN05980543	6	Escherichia coli
SAMN05980549	-	Escherichia coli
SAMN05980550	1118	Escherichia coli
SAMN05980551	-	Escherichia coli
SAMN05980554	638	Escherichia coli
SAMN05980566	-	Escherichia coli
SAMN05980575	-	Escherichia coli
SAMN05980582	130	Escherichia coli
SAMN05980585	562	Escherichia coli
SAMN05980587	-	Escherichia coli
SAMN05980589	314	Escherichia coli
SAMN05980592	562	Escherichia coli
SAMN05980603	350	Escherichia coli
SAMN05980721	-	Escherichia coli
SAMN05980739	-	Escherichia coli
SAMN05980762	563	Escherichia coli
SAMN05980769	-	Escherichia coli
SAMN05980779	563	Escherichia coli
SAMN05980788	563	Escherichia coli
SAMN05980791	563	Escherichia coli
SAMN05980794	-	Escherichia coli
SAMN05980797	563	Escherichia coli
SAMN05980818	1019	Escherichia coli
SAMN05980857	481	Escherichia coli
SAMN05980861	-	Escherichia coli
SAMN05980862	-	Escherichia coli
SAMN05980863	628	Escherichia coli
SAMN05980866	-	Escherichia coli
SAMN05980867	420	Escherichia coli
SAMN05980868	-	Escherichia coli
SAMN05980887	-	Escherichia coli
SAMN05980888	1	Escherichia coli
SAMN05980893	77	Escherichia coli
SAMN05980894	7	Escherichia coli
SAMN05980896	-	Escherichia coli
SAMN05980901	481	Escherichia coli
SAMN05980902	-	Escherichia coli
SAMN05980903	563	Escherichia coli
SAMN05980915	-	Escherichia coli
SAMN05980916	628	Escherichia coli
SAMN05980922	-	Escherichia coli
SAMN05980924	558	Escherichia coli
SAMN05980928	-	Escherichia coli
SAMN05980947	-	Escherichia coli
SAMN05980948	638	Escherichia coli
SAMN05980953	44	Escherichia coli
SAMN05980954	628	Escherichia coli
SAMN05980956	728	Escherichia coli
SAMN05980966	8	Escherichia coli
SAMN05980967	-	Escherichia coli
SAMN05980973	481	Escherichia coli
SAMN05980981	628	Escherichia coli
SAMN05980984	350	Escherichia coli
SAMN05980985	-	Escherichia coli
SAMN05981003	481	Escherichia coli
SAMN05981007	-	Escherichia coli
SAMN05981008	816	Escherichia coli
SAMN05981009	628	Escherichia coli
SAMN05981020	-	Escherichia coli
SAMN05981022	-	Escherichia coli
SAMN05981023	481	Escherichia coli
SAMN05981027	628	Escherichia coli
SAMN05981037	-	Escherichia coli
SAMN05981054	481	Escherichia coli
SAMN05981060	628	Escherichia coli
SAMN05981062	-	Escherichia coli
SAMN05981068	-	Escherichia coli
SAMN05981072	86	Escherichia coli
SAMN05981076	-	Escherichia coli
SAMN05981078	-	Escherichia coli
SAMN05981082	3	Escherichia coli
SAMN06005867	-	Escherichia coli
SAMN06005915	-	Escherichia coli
SAMN06005923	481	Escherichia coli
SAMN06005925	135	Escherichia coli
SAMN06005930	367	Escherichia coli
SAMN06005934	-	Escherichia coli
SAMN06006003	628	Escherichia coli
SAMN06006005	480	Escherichia coli
SAMN06006011	-	Escherichia coli
SAMN06006014	-	Escherichia coli
SAMN06006015	-	Escherichia coli
SAMN06006017	-	Escherichia coli
SAMN06006020	-	Escherichia coli
SAMN06006023	-	Escherichia coli
SAMN06006025	628	Escherichia coli
SAMN06006026	-	Escherichia coli
SAMN06006027	-	Escherichia coli
SAMN06006028	88	Escherichia coli
SAMN06006030	563	Escherichia coli
SAMN06006034	628	Escherichia coli
SAMN06006036	357	Escherichia coli
SAMN06006044	415	Escherichia coli
SAMN06006088	628	Escherichia coli
SAMN06006104	-	Escherichia coli
SAMN06006108	628	Escherichia coli
SAMN06006112	357	Escherichia coli
SAMN06006114	-	Escherichia coli
SAMN06006124	563	Escherichia coli
SAMN06006161	563	Escherichia coli
SAMN06006162	415	Escherichia coli
SAMN06006165	-	Escherichia coli
SAMN06006167	-	Escherichia coli
SAMN06006187	1010	Escherichia coli
SAMN06006195	481	Escherichia coli
SAMN06006197	628	Escherichia coli
SAMN06006199	628	Escherichia coli
SAMN06006203	481	Escherichia coli
SAMN06006217	-	Escherichia coli
SAMN06006225	480	Escherichia coli
SAMN06006230	628	Escherichia coli
SAMN06006233	563	Escherichia coli
SAMN06006239	-	Escherichia coli
SAMN06006244	628	Escherichia coli
SAMN06006245	-	Escherichia coli
SAMN06006246	-	Escherichia coli
SAMN06006249	1019	Escherichia coli
SAMN06006255	-	Escherichia coli
SAMN06006261	350	Escherichia coli
SAMN06006267	-	Escherichia coli
SAMN06006268	126	Escherichia coli
SAMN06006270	-	Escherichia coli
SAMN06006272	-	Escherichia coli
SAMN06006273	563	Escherichia coli
SAMN06006275	-	Escherichia coli
SAMN06006277	628	Escherichia coli
SAMN06006283	446	Escherichia coli
SAMN06006290	628	Escherichia coli
SAMN06006302	1092	Escherichia coli
SAMN06006375	628	Escherichia coli
SAMN06006376	563	Escherichia coli
SAMN06006380	-	Escherichia coli
SAMN06006384	-	Escherichia coli
SAMN06006385	563	Escherichia coli
SAMN06006386	895	Escherichia coli
SAMN06006389	415	Escherichia coli
SAMN06006401	628	Escherichia coli
SAMN06006408	481	Escherichia coli
SAMN06006409	481	Escherichia coli
SAMN06006412	546	Escherichia coli
SAMN06006418	1092	Escherichia coli
SAMN06006424	628	Escherichia coli
SAMN06006431	628	Escherichia coli
SAMN06006432	-	Escherichia coli
SAMN06006435	-	Escherichia coli
SAMN06006442	367	Escherichia coli
SAMN06006448	-	Escherichia coli
SAMN06006451	-	Escherichia coli
SAMN06014884	628	Escherichia coli
SAMN06014957	563	Escherichia coli
SAMN06014964	3	Escherichia coli
SAMN06014973	304	Escherichia coli
SAMN06014980	-	Escherichia coli
SAMN06015035	563	Escherichia coli
SAMN06015250	-	Escherichia coli
SAMN06015364	-	Escherichia coli
SAMN06015603	-	Escherichia coli
SAMN06015636	-	Escherichia coli
SAMN06015644	53	Escherichia coli
SAMN06018528	-	Escherichia coli
SAMN06018610	-	Escherichia coli
SAMN06018618	563	Escherichia coli
SAMN06018636	666	Escherichia coli
SAMN06018641	628	Escherichia coli
SAMN06018711	1	Escherichia coli
SAMN06018720	-	Escherichia coli
SAMN06018722	1019	Escherichia coli
SAMN06018809	-	Escherichia coli
SAMN06018810	-	Escherichia coli
SAMN06018815	-	Escherichia coli
SAMN06018816	-	Escherichia coli
SAMN06018837	628	Escherichia coli
SAMN06018842	-	Escherichia coli
SAMN06018845	628	Escherichia coli
SAMN06018850	-	Escherichia coli
SAMN06018853	-	Escherichia coli
SAMN06018854	480	Escherichia coli
SAMN06018856	-	Escherichia coli
SAMN06018860	-	Escherichia coli
SAMN06018866	-	Escherichia coli
SAMN06018877	628	Escherichia coli
SAMN06018881	628	Escherichia coli
SAMN06018888	628	Escherichia coli
SAMN06018890	628	Escherichia coli
SAMN06018899	563	Escherichia coli
SAMN06018907	628	Escherichia coli
SAMN06018910	563	Escherichia coli
SAMN06018928	628	Escherichia coli
SAMN06018941	478	Escherichia coli
SAMN06018956	-	Escherichia coli
SAMN06018993	628	Escherichia coli
SAMN06018996	1	Escherichia coli
SAMN06019022	-	Escherichia coli
SAMN06019037	628	Escherichia coli
SAMN06019038	350	Escherichia coli
SAMN06019040	628	Escherichia coli
SAMN06019144	-	Escherichia coli
SAMN06019150	-	Escherichia coli
SAMN06019153	-	Escherichia coli
SAMN06019196	8	Escherichia coli
SAMN06019200	-	Escherichia coli
SAMN06019201	-	Escherichia coli
SAMN06019206	-	Escherichia coli
SAMN06019208	481	Escherichia coli
SAMN06019237	43	Escherichia coli
SAMN06019251	563	Escherichia coli
SAMN06029372	481	Escherichia coli
SAMN06030836	34	Escherichia coli
SAMN06030878	1	Escherichia coli
SAMN06039818	528	Escherichia coli
SAMN06039828	135	Escherichia coli
SAMN06039841	-	Escherichia coli
SAMN06039851	570	Escherichia coli
SAMN06039867	-	Escherichia coli
SAMN06039886	74	Escherichia coli
SAMN06040186	-	Escherichia coli
SAMN06040193	591	Escherichia coli
SAMN06040224	1019	Escherichia coli
SAMN06040237	-	Escherichia coli
SAMN06040243	130	Escherichia coli
SAMN06040251	349	Escherichia coli
SAMN06040319	-	Escherichia coli
SAMN06040321	591	Escherichia coli
SAMN06040323	2	Escherichia coli
SAMN06040326	-	Escherichia coli
SAMN06040327	570	Escherichia coli
SAMN06040328	-	Escherichia coli
SAMN06040329	-	Escherichia coli
SAMN06040331	-	Escherichia coli
SAMN06040333	139	Escherichia coli
SAMN06040334	-	Escherichia coli
SAMN06040335	367	Escherichia coli
SAMN06434889	-	Escherichia coli
SAMN06630104	2	Escherichia coli
SAMN06630105	477	Escherichia coli
SAMN06630138	471	Escherichia coli
SAMN06630169	-	Escherichia coli
SAMN06630231	3	Escherichia coli
SAMN06630285	-	Escherichia coli
SAMN06630299	477	Escherichia coli
SAMN06806040	628	Escherichia coli
SAMN06821427	-	Escherichia coli
SAMN06824351	-	Escherichia coli
SAMN06824353	290	Escherichia coli
SAMN06824354	478	Escherichia coli
SAMN06824358	816	Escherichia coli
SAMN06824361	-	Escherichia coli
SAMN06824384	-	Escherichia coli
SAMN06824385	-	Escherichia coli
SAMN06824386	-	Escherichia coli
SAMN06824390	478	Escherichia coli
SAMN06824391	-	Escherichia coli
SAMN06824392	290	Escherichia coli
SAMN06824393	-	Escherichia coli
SAMN06824404	478	Escherichia coli
SAMN06824411	290	Escherichia coli
SAMN06826822	8	Escherichia coli
SAMN06826825	-	Escherichia coli
SAMN06826826	-	Escherichia coli
SAMN06826836	-	Escherichia coli
SAMN06826837	478	Escherichia coli
SAMN06826838	-	Escherichia coli
SAMN06826840	-	Escherichia coli
SAMN06826841	-	Escherichia coli
SAMN06826844	-	Escherichia coli
SAMN06826847	-	Escherichia coli
SAMN06826860	-	Escherichia coli
SAMN06826861	3	Escherichia coli
SAMN06826862	-	Escherichia coli
SAMN06826863	740	Escherichia coli
SAMN06826865	77	Escherichia coli
SAMN06826866	-	Escherichia coli
SAMN06826867	-	Escherichia coli
SAMN06826868	-	Escherichia coli
SAMN06826869	-	Escherichia coli
SAMN07299071	-	Escherichia coli
SAMN07455255	628	Escherichia coli
SAMN07595904	1019	Escherichia coli
SAMN07595905	1019	Escherichia coli
SAMN07595909	1019	Escherichia coli
SAMN07595911	1019	Escherichia coli
SAMN07595913	1019	Escherichia coli
SAMN07595914	1019	Escherichia coli
SAMN07595916	1019	Escherichia coli
SAMN07595917	1019	Escherichia coli
SAMN07595920	1019	Escherichia coli
SAMN07595941	1019	Escherichia coli
SAMN07595943	1019	Escherichia coli
SAMN07599881	1019	Escherichia coli
SAMN07599887	1019	Escherichia coli
SAMN07599897	1019	Escherichia coli
SAMN07599900	1019	Escherichia coli
SAMN07599901	1019	Escherichia coli
SAMN07599925	1019	Escherichia coli
SAMN07599926	1019	Escherichia coli
SAMN07599928	1019	Escherichia coli
SAMN07601769	628	Escherichia coli
SAMN07601787	628	Escherichia coli
SAMN07601805	628	Escherichia coli
SAMN07601806	628	Escherichia coli
SAMN07601811	628	Escherichia coli
SAMN07610324	-	Escherichia coli
SAMN07610325	-	Escherichia coli
SAMN07610330	-	Escherichia coli
SAMN07610332	-	Escherichia coli
SAMN07672189	628	Escherichia coli
SAMN07672191	628	Escherichia coli
SAMN07672201	-	Escherichia coli
SAMN07672205	628	Escherichia coli
SAMN07672239	-	Escherichia coli
SAMN07672258	628	Escherichia coli
SAMN07672293	628	Escherichia coli
SAMN07672311	-	Escherichia coli
SAMN07672355	628	Escherichia coli
SAMN07672358	628	Escherichia coli
SAMN07672370	628	Escherichia coli
SAMN07672514	628	Escherichia coli
SAMN07672527	-	Escherichia coli
SAMN07672560	628	Escherichia coli
SAMN07672593	628	Escherichia coli
SAMN07672595	-	Escherichia coli
SAMN07672618	628	Escherichia coli
SAMN07672638	628	Escherichia coli
SAMN07672652	628	Escherichia coli
SAMN07672655	628	Escherichia coli
SAMN07672735	628	Escherichia coli
SAMN07672755	628	Escherichia coli
SAMN07672776	628	Escherichia coli
SAMN07672777	628	Escherichia coli
SAMN07672783	628	Escherichia coli
SAMN07672789	628	Escherichia coli
SAMN07672792	628	Escherichia coli
SAMN07672926	628	Escherichia coli
SAMN07672934	628	Escherichia coli
SAMN07672942	628	Escherichia coli
SAMN07672946	628	Escherichia coli
SAMN07672947	628	Escherichia coli
SAMN07672954	-	Escherichia coli
SAMN07672957	628	Escherichia coli
SAMN07672966	628	Escherichia coli
SAMN07672968	628	Escherichia coli
SAMN07672976	628	Escherichia coli
SAMN07672983	628	Escherichia coli
SAMN07672984	-	Escherichia coli
SAMN07672985	628	Escherichia coli
SAMN07673001	628	Escherichia coli
SAMN07673013	628	Escherichia coli
SAMN07673014	628	Escherichia coli
SAMN07673015	628	Escherichia coli
SAMN07673017	628	Escherichia coli
SAMN07673018	-	Escherichia coli
SAMN07673024	628	Escherichia coli
SAMN07673027	628	Escherichia coli
SAMN07673030	628	Escherichia coli
SAMN07673034	628	Escherichia coli
SAMN07673053	628	Escherichia coli
SAMN07673055	628	Escherichia coli
SAMN07673062	628	Escherichia coli
SAMN07673063	628	Escherichia coli
SAMN07673076	628	Escherichia coli
SAMN07673083	628	Escherichia coli
SAMN07673084	628	Escherichia coli
SAMN07673151	628	Escherichia coli
SAMN07673155	628	Escherichia coli
SAMN07673162	628	Escherichia coli
SAMN07673170	628	Escherichia coli
SAMN07673183	628	Escherichia coli
SAMN07673186	628	Escherichia coli
SAMN07673190	628	Escherichia coli
SAMN07708564	628	Escherichia coli
SAMN07708855	628	Escherichia coli
SAMN07708858	628	Escherichia coli
SAMN07708883	-	Escherichia coli
SAMN07708884	628	Escherichia coli
SAMN07708886	628	Escherichia coli
SAMN07708888	628	Escherichia coli
SAMN07708999	628	Escherichia coli
SAMN07709004	628	Escherichia coli
SAMN07709010	628	Escherichia coli
SAMN07748131	-	Escherichia coli
SAMN07748134	586	Escherichia coli
SAMN07748136	586	Escherichia coli
SAMN07748143	586	Escherichia coli
SAMN07748146	586	Escherichia coli
SAMN07807492	-	Escherichia coli
SAMN07807495	-	Escherichia coli
SAMN07807496	572	Escherichia coli
SAMN07807498	126	Escherichia coli
SAMN07807500	357	Escherichia coli
SAMN07807501	809	Escherichia coli
SAMN07807503	-	Escherichia coli
SAMN07807504	446	Escherichia coli
SAMN07807505	-	Escherichia coli
SAMN07807507	687	Escherichia coli
SAMN07807510	570	Escherichia coli
SAMN07807511	-	Escherichia coli
SAMN07807512	-	Escherichia coli
SAMN07807513	-	Escherichia coli
SAMN07807514	349	Escherichia coli
SAMN07807515	809	Escherichia coli
SAMN07807517	478	Escherichia coli
SAMN07807519	135	Escherichia coli
SAMN07807520	998	Escherichia coli
SAMN07807523	446	Escherichia coli
SAMN07807525	-	Escherichia coli
SAMN07807527	350	Escherichia coli
SAMN07807530	-	Escherichia coli
SAMN07807531	-	Escherichia coli
SAMN07807532	553	Escherichia coli
SAMN07807533	-	Escherichia coli
SAMN07807534	-	Escherichia coli
SAMN07807535	135	Escherichia coli
SAMN07807536	-	Escherichia coli
SAMN07807537	446	Escherichia coli
SAMN07807538	378	Escherichia coli
SAMN07807539	-	Escherichia coli
SAMN07807541	139	Escherichia coli
SAMN07807543	-	Escherichia coli
SAMN07807544	481	Escherichia coli
SAMN07807545	2	Escherichia coli
SAMN07807546	446	Escherichia coli
SAMN07807547	-	Escherichia coli
SAMN07807548	446	Escherichia coli
SAMN07807550	-	Escherichia coli
SAMN08095933	130	Escherichia coli
SAMN08095936	415	Escherichia coli
SAMN08095938	481	Escherichia coli
SAMN08095945	-	Escherichia coli
SAMN08095947	-	Escherichia coli
SAMN08100228	481	Escherichia coli
SAMN08100231	-	Escherichia coli
SAMN08100233	628	Escherichia coli
SAMN08100243	628	Escherichia coli
SAMN08100244	-	Escherichia coli
SAMN08100248	628	Escherichia coli
SAMN08359245	591	Escherichia coli
SAMN08359247	-	Escherichia coli
SAMN08359249	-	Escherichia coli
SAMN08359251	1023	Escherichia coli
SAMN08359258	290	Escherichia coli
SAMN08359259	591	Escherichia coli
SAMN08359260	553	Escherichia coli
SAMN08365311	-	Escherichia coli
SAMN08366932	-	Escherichia coli
SAMN08366933	-	Escherichia coli
SAMN08366937	-	Escherichia coli
SAMN08366938	-	Escherichia coli
SAMN08366939	-	Escherichia coli
SAMN08366940	-	Escherichia coli
SAMN08366941	-	Escherichia coli
SAMN08366943	-	Escherichia coli
SAMN08366944	-	Escherichia coli
SAMN08366947	-	Escherichia coli
SAMN08366952	-	Escherichia coli
SAMN08366953	-	Escherichia coli
SAMN08366964	-	Escherichia coli
SAMN08367548	-	Escherichia coli
SAMN08383260	-	Escherichia coli
SAMN08383630	290	Escherichia coli
SAMN08383653	-	Escherichia coli
SAMN08383655	-	Escherichia coli
SAMN08661308	999	Escherichia coli
SAMN08661323	628	Escherichia coli
SAMN08661329	-	Escherichia coli
SAMN08687013	628	Escherichia coli
SAMN08849471	-	Escherichia coli
SAMN09207664	481	Escherichia coli
SAMN09207666	-	Escherichia coli
SAMN09207667	415	Escherichia coli
SAMN09207668	420	Escherichia coli
SAMN09207670	-	Escherichia coli
SAMN09207675	481	Escherichia coli
SAMN09207679	483	Escherichia coli
SAMN09207682	-	Escherichia coli
SAMN09207685	-	Escherichia coli
SAMN09207686	350	Escherichia coli
SAMN09207691	628	Escherichia coli
SAMN09207692	74	Escherichia coli
SAMN09207693	31	Escherichia coli
SAMN09207697	-	Escherichia coli
SAMN09207701	628	Escherichia coli
SAMN09207708	-	Escherichia coli
SAMN09207709	-	Escherichia coli
SAMN09207710	-	Escherichia coli
SAMN09207731	-	Escherichia coli
SAMN09207737	-	Escherichia coli
SAMN09211146	563	Escherichia coli
SAMN09211150	74	Escherichia coli
SAMN09211158	350	Escherichia coli
SAMN09211162	130	Escherichia coli
SAMN09211167	506	Escherichia coli
SAMN09211231	835	Escherichia coli
SAMN09211233	-	Escherichia coli
SAMN09211237	822	Escherichia coli
SAMN09211241	628	Escherichia coli
SAMN09213500	563	Escherichia coli
SAMN09214194	-	Escherichia coli
SAMN09214236	-	Escherichia coli
SAMN09214238	-	Escherichia coli
SAMN09214240	-	Escherichia coli
SAMN09214245	563	Escherichia coli
SAMN09214348	-	Escherichia coli
SAMN09214349	563	Escherichia coli
SAMN09214350	809	Escherichia coli
SAMN09214360	-	Escherichia coli
SAMN09214362	563	Escherichia coli
SAMN09214375	563	Escherichia coli
SAMN09214397	570	Escherichia coli
SAMN09214400	-	Escherichia coli
SAMN09214419	-	Escherichia coli
SAMN09214430	563	Escherichia coli
SAMN09214496	-	Escherichia coli
SAMN09214509	8	Escherichia coli
SAMN09222036	-	Escherichia coli
SAMN09222040	-	Escherichia coli
SAMN09222042	563	Escherichia coli
SAMN09222048	895	Escherichia coli
SAMN09222049	563	Escherichia coli
SAMN09222050	1092	Escherichia coli
SAMN09222053	1023	Escherichia coli
SAMN09222054	-	Escherichia coli
SAMN09222056	481	Escherichia coli
SAMN09222062	-	Escherichia coli
SAMN09222064	-	Escherichia coli
SAMN09222065	563	Escherichia coli
SAMN09222067	-	Escherichia coli
SAMN09222079	3	Escherichia coli
SAMN09222112	290	Escherichia coli
SAMN09222123	-	Escherichia coli
SAMN09222146	-	Escherichia coli
SAMN09222155	-	Escherichia coli
SAMN09222156	563	Escherichia coli
SAMN09222188	-	Escherichia coli
SAMN09222191	-	Escherichia coli
SAMN09222197	563	Escherichia coli
SAMN09222262	628	Escherichia coli
SAMN09225200	-	Escherichia coli
SAMN09225201	-	Escherichia coli
SAMN09225204	-	Escherichia coli
SAMN09225320	563	Escherichia coli
SAMN09225340	-	Escherichia coli
SAMN09225343	-	Escherichia coli
SAMN09225348	34	Escherichia coli
SAMN09225352	446	Escherichia coli
SAMN09225354	415	Escherichia coli
SAMN09225356	563	Escherichia coli
SAMN09225358	415	Escherichia coli
SAMN09225360	-	Escherichia coli
SAMN09225361	-	Escherichia coli
SAMN09225362	628	Escherichia coli
SAMN09225365	-	Escherichia coli
SAMN09225368	481	Escherichia coli
SAMN09225369	563	Escherichia coli
SAMN09225371	563	Escherichia coli
SAMN09225378	-	Escherichia coli
SAMN09225379	415	Escherichia coli
SAMN09225381	-	Escherichia coli
SAMN09225382	481	Escherichia coli
SAMN09225389	563	Escherichia coli
SAMN09225391	-	Escherichia coli
SAMN09225393	831	Escherichia coli
SAMN09225394	-	Escherichia coli
SAMN09225399	130	Escherichia coli
SAMN09225407	-	Escherichia coli
SAMN09225409	367	Escherichia coli
SAMN09225411	563	Escherichia coli
SAMN09225414	-	Escherichia coli
SAMN09225415	-	Escherichia coli
SAMN09225417	895	Escherichia coli
SAMN09225418	-	Escherichia coli
SAMN09225420	-	Escherichia coli
SAMN09225426	628	Escherichia coli
SAMN09225428	-	Escherichia coli
SAMN09225434	155	Escherichia coli
SAMN09225440	-	Escherichia coli
SAMN09225441	-	Escherichia coli
SAMN09225442	-	Escherichia coli
SAMN09225448	563	Escherichia coli
SAMN09225449	-	Escherichia coli
SAMN09225462	-	Escherichia coli
SAMN09225472	-	Escherichia coli
SAMN09225474	-	Escherichia coli
SAMN09225475	-	Escherichia coli
SAMN09225572	-	Escherichia coli
SAMN09225587	-	Escherichia coli
SAMN09225590	-	Escherichia coli
SAMN09225599	-	Escherichia coli
SAMN09225607	628	Escherichia coli
SAMN09225608	-	Escherichia coli
SAMN09227612	-	Escherichia coli
SAMN09227613	563	Escherichia coli
SAMN09227616	-	Escherichia coli
SAMN09227617	481	Escherichia coli
SAMN09227620	1112	Escherichia coli
SAMN09227635	480	Escherichia coli
SAMN09227642	-	Escherichia coli
SAMN09227655	130	Escherichia coli
SAMN09227656	628	Escherichia coli
SAMN09227658	-	Escherichia coli
SAMN09227661	-	Escherichia coli
SAMN09227663	-	Escherichia coli
SAMN09227667	-	Escherichia coli
SAMN09227671	-	Escherichia coli
SAMN09227672	-	Escherichia coli
SAMN09227675	-	Escherichia coli
SAMN09227676	563	Escherichia coli
SAMN09227677	528	Escherichia coli
SAMN09227680	-	Escherichia coli
SAMN09227681	563	Escherichia coli
SAMN09227682	-	Escherichia coli
SAMN09227686	-	Escherichia coli
SAMN09227687	563	Escherichia coli
SAMN09227699	-	Escherichia coli
SAMN09227701	-	Escherichia coli
SAMN09227704	628	Escherichia coli
SAMN09227707	-	Escherichia coli
SAMN09227708	-	Escherichia coli
SAMN09227709	399	Escherichia coli
SAMN09227712	-	Escherichia coli
SAMN09227715	-	Escherichia coli
SAMN09227716	-	Escherichia coli
SAMN09227718	563	Escherichia coli
SAMN09227733	563	Escherichia coli
SAMN09227735	-	Escherichia coli
SAMN09227736	339	Escherichia coli
SAMN09227744	350	Escherichia coli
SAMN09227747	-	Escherichia coli
SAMN09227753	817	Escherichia coli
SAMN09227755	415	Escherichia coli
SAMN09227759	350	Escherichia coli
SAMN09227762	-	Escherichia coli
SAMN09227783	563	Escherichia coli
SAMN09227790	-	Escherichia coli
SAMN09227809	895	Escherichia coli
SAMN09227941	7	Escherichia coli
SAMN09228475	-	Escherichia coli
SAMN09228479	-	Escherichia coli
SAMN09228483	1	Escherichia coli
SAMN09228496	-	Escherichia coli
SAMN09228502	-	Escherichia coli
SAMN09228505	-	Escherichia coli
SAMN09228508	-	Escherichia coli
SAMN09228509	563	Escherichia coli
SAMN09228514	74	Escherichia coli
SAMN09228518	26	Escherichia coli
SAMN09228519	-	Escherichia coli
SAMN09228524	1092	Escherichia coli
SAMN09228527	367	Escherichia coli
SAMN09228532	563	Escherichia coli
SAMN09228534	350	Escherichia coli
SAMN09228552	1023	Escherichia coli
SAMN09228569	-	Escherichia coli
SAMN09228571	563	Escherichia coli
SAMN09228576	-	Escherichia coli
SAMN09228579	-	Escherichia coli
SAMN09228583	563	Escherichia coli
SAMN09228590	-	Escherichia coli
SAMN09228592	511	Escherichia coli
SAMN09228594	-	Escherichia coli
SAMN09228595	570	Escherichia coli
SAMN09228596	-	Escherichia coli
SAMN09228612	-	Escherichia coli
SAMN09228619	628	Escherichia coli
SAMN09228624	-	Escherichia coli
SAMN09228826	563	Escherichia coli
SAMN09228852	563	Escherichia coli
SAMN09232564	563	Escherichia coli
SAMN09232570	-	Escherichia coli
SAMN09232576	563	Escherichia coli
SAMN09232586	43	Escherichia coli
SAMN09232587	-	Escherichia coli
SAMN09232589	1	Escherichia coli
SAMN09232590	328	Escherichia coli
SAMN09232593	563	Escherichia coli
SAMN09232595	363	Escherichia coli
SAMN09232597	43	Escherichia coli
SAMN09232606	-	Escherichia coli
SAMN09232609	-	Escherichia coli
SAMN09232610	563	Escherichia coli
SAMN09232614	-	Escherichia coli
SAMN09233240	-	Escherichia coli
SAMN09233242	481	Escherichia coli
SAMN09233245	-	Escherichia coli
SAMN09233286	-	Escherichia coli
SAMN09233292	563	Escherichia coli
SAMN09233294	546	Escherichia coli
SAMN09233305	628	Escherichia coli
SAMN09233350	-	Escherichia coli
SAMN09233353	350	Escherichia coli
SAMN09233368	130	Escherichia coli
SAMN09233413	134	Escherichia coli
SAMN09233415	-	Escherichia coli
SAMN09233417	563	Escherichia coli
SAMN09233419	-	Escherichia coli
SAMN09233428	350	Escherichia coli
SAMN09233542	-	Escherichia coli
SAMN09238244	-	Escherichia coli
SAMN09238275	-	Escherichia coli
SAMN09238279	-	Escherichia coli
SAMN09238280	-	Escherichia coli
SAMN09238288	-	Escherichia coli
SAMN09238330	1	Escherichia coli
SAMN09238337	-	Escherichia coli
SAMN09238366	628	Escherichia coli
SAMN09238382	563	Escherichia coli
SAMN09238389	563	Escherichia coli
SAMN09238400	4	Escherichia coli
SAMN09238475	-	Escherichia coli
SAMN09238497	-	Escherichia coli
SAMN09238500	563	Escherichia coli
SAMN09238608	135	Escherichia coli
SAMN09238609	-	Escherichia coli
SAMN09238615	483	Escherichia coli
SAMN09238629	563	Escherichia coli
SAMN09238630	-	Escherichia coli
SAMN09238634	481	Escherichia coli
SAMN09238638	-	Escherichia coli
SAMN09238641	628	Escherichia coli
SAMN09238644	563	Escherichia coli
SAMN09238649	-	Escherichia coli
SAMN09238650	563	Escherichia coli
SAMN09238651	-	Escherichia coli
SAMN09238653	-	Escherichia coli
SAMN09238659	350	Escherichia coli
SAMN09238661	628	Escherichia coli
SAMN09238667	-	Escherichia coli
SAMN09238668	-	Escherichia coli
SAMN09238677	563	Escherichia coli
SAMN09238680	-	Escherichia coli
SAMN09238682	1092	Escherichia coli
SAMN09238684	290	Escherichia coli
SAMN09238687	-	Escherichia coli
SAMN09238689	215	Escherichia coli
SAMN09238697	628	Escherichia coli
SAMN09238723	74	Escherichia coli
SAMN09238725	563	Escherichia coli
SAMN09238726	-	Escherichia coli
SAMN09238727	7	Escherichia coli
SAMN09238728	563	Escherichia coli
SAMN09238738	628	Escherichia coli
SAMN09244070	4	Escherichia coli
SAMN09244071	-	Escherichia coli
SAMN09244073	290	Escherichia coli
SAMN09244078	8	Escherichia coli
SAMN09244080	628	Escherichia coli
SAMN09244081	-	Escherichia coli
SAMN09244099	1023	Escherichia coli
SAMN09244100	-	Escherichia coli
SAMN09244104	481	Escherichia coli
SAMN09244106	-	Escherichia coli
SAMN09244112	-	Escherichia coli
SAMN09244114	478	Escherichia coli
SAMN09244142	481	Escherichia coli
SAMN09244148	-	Escherichia coli
SAMN09244149	-	Escherichia coli
SAMN09244150	303	Escherichia coli
SAMN09244152	-	Escherichia coli
SAMN09244154	481	Escherichia coli
SAMN09244155	563	Escherichia coli
SAMN09244162	-	Escherichia coli
SAMN09244163	-	Escherichia coli
SAMN09244164	917	Escherichia coli
SAMN09244165	-	Escherichia coli
SAMN09244172	-	Escherichia coli
SAMN09244173	77	Escherichia coli
SAMN09244175	7	Escherichia coli
SAMN09244176	563	Escherichia coli
SAMN09244177	-	Escherichia coli
SAMN09244179	48	Escherichia coli
SAMN09244183	895	Escherichia coli
SAMN09244184	-	Escherichia coli
SAMN09244186	-	Escherichia coli
SAMN09244187	481	Escherichia coli
SAMN09244188	483	Escherichia coli
SAMN09255597	563	Escherichia coli
SAMN09255808	563	Escherichia coli
SAMN09255810	-	Escherichia coli
SAMN09255835	135	Escherichia coli
SAMN09255927	481	Escherichia coli
SAMN09255929	-	Escherichia coli
SAMN09257541	628	Escherichia coli
SAMN09257547	481	Escherichia coli
SAMN09257714	563	Escherichia coli
SAMN09257716	-	Escherichia coli
SAMN09257719	-	Escherichia coli
SAMN09257722	628	Escherichia coli
SAMN09257723	350	Escherichia coli
SAMN09257725	400	Escherichia coli
SAMN09257727	-	Escherichia coli
SAMN09257733	-	Escherichia coli
SAMN09257738	-	Escherichia coli
SAMN09257745	-	Escherichia coli
SAMN09257757	-	Escherichia coli
SAMN09257758	-	Escherichia coli
SAMN09257759	130	Escherichia coli
SAMN09257763	563	Escherichia coli
SAMN09257764	-	Escherichia coli
SAMN09257765	1023	Escherichia coli
SAMN09257772	7	Escherichia coli
SAMN09257775	-	Escherichia coli
SAMN09257780	-	Escherichia coli
SAMN09257828	563	Escherichia coli
SAMN09257834	-	Escherichia coli
SAMN09257838	481	Escherichia coli
SAMN09257846	-	Escherichia coli
SAMN09257849	66	Escherichia coli
SAMN09257852	-	Escherichia coli
SAMN09257855	563	Escherichia coli
SAMN09257857	-	Escherichia coli
SAMN09257896	-	Escherichia coli
SAMN09266483	3	Escherichia coli
SAMN09266694	-	Escherichia coli
SAMN09266697	893	Escherichia coli
SAMN09266699	628	Escherichia coli
SAMN09266705	3	Escherichia coli
SAMN09266706	-	Escherichia coli
SAMN09266710	661	Escherichia coli
SAMN09266715	2	Escherichia coli
SAMN09266717	-	Escherichia coli
SAMN09266727	563	Escherichia coli
SAMN09266731	-	Escherichia coli
SAMN09266732	-	Escherichia coli
SAMN09266733	-	Escherichia coli
SAMN09266736	130	Escherichia coli
SAMN09266741	-	Escherichia coli
SAMN09266751	1010	Escherichia coli
SAMN09266779	-	Escherichia coli
SAMN09266782	367	Escherichia coli
SAMN09266788	-	Escherichia coli
SAMN09266791	481	Escherichia coli
SAMN09266918	-	Escherichia coli
SAMN09266922	-	Escherichia coli
SAMN09266927	-	Escherichia coli
SAMN09266928	563	Escherichia coli
SAMN09266930	390	Escherichia coli
SAMN09266931	130	Escherichia coli
SAMN09266933	-	Escherichia coli
SAMN09266937	-	Escherichia coli
SAMN09266938	350	Escherichia coli
SAMN09266944	563	Escherichia coli
SAMN09266949	32	Escherichia coli
SAMN09266952	-	Escherichia coli
SAMN09266955	-	Escherichia coli
SAMN09266958	-	Escherichia coli
SAMN09266959	-	Escherichia coli
SAMN09266961	-	Escherichia coli
SAMN09266966	-	Escherichia coli
SAMN09266967	563	Escherichia coli
SAMN09266993	-	Escherichia coli
SAMN09266999	563	Escherichia coli
SAMN09268767	628	Escherichia coli
SAMN09268775	-	Escherichia coli
SAMN09268778	-	Escherichia coli
SAMN09268779	563	Escherichia coli
SAMN09268784	-	Escherichia coli
SAMN09268786	-	Escherichia coli
SAMN09268792	-	Escherichia coli
SAMN09268795	-	Escherichia coli
SAMN09268796	-	Escherichia coli
SAMN09268798	591	Escherichia coli
SAMN09268801	-	Escherichia coli
SAMN09268811	350	Escherichia coli
SAMN09268812	-	Escherichia coli
SAMN09268813	-	Escherichia coli
SAMN09268814	-	Escherichia coli
SAMN09268815	563	Escherichia coli
SAMN09268816	628	Escherichia coli
SAMN09268817	26	Escherichia coli
SAMN09268822	563	Escherichia coli
SAMN09268823	-	Escherichia coli
SAMN09268825	-	Escherichia coli
SAMN09268826	-	Escherichia coli
SAMN09268828	628	Escherichia coli
SAMN09268832	628	Escherichia coli
SAMN09268833	-	Escherichia coli
SAMN09268843	73	Escherichia coli
SAMN09268845	130	Escherichia coli
SAMN09268849	-	Escherichia coli
SAMN09268850	135	Escherichia coli
SAMN09268853	46	Escherichia coli
SAMN09268854	-	Escherichia coli
SAMN09268855	-	Escherichia coli
SAMN09268859	-	Escherichia coli
SAMN09268863	130	Escherichia coli
SAMN09268866	563	Escherichia coli
SAMN09268868	917	Escherichia coli
SAMN09268877	-	Escherichia coli
SAMN09268879	-	Escherichia coli
SAMN09268882	-	Escherichia coli
SAMN09276260	1092	Escherichia coli
SAMN09276261	563	Escherichia coli
SAMN09276269	563	Escherichia coli
SAMN09276273	628	Escherichia coli
SAMN09276275	563	Escherichia coli
SAMN09276277	-	Escherichia coli
SAMN09276282	-	Escherichia coli
SAMN09276284	628	Escherichia coli
SAMN09276289	-	Escherichia coli
SAMN09276290	-	Escherichia coli
SAMN09276292	563	Escherichia coli
SAMN09276296	-	Escherichia coli
SAMN09276300	-	Escherichia coli
SAMN09276302	570	Escherichia coli
SAMN09276307	-	Escherichia coli
SAMN09276326	-	Escherichia coli
SAMN09276331	563	Escherichia coli
SAMN09276500	-	Escherichia coli
SAMN09276505	-	Escherichia coli
SAMN09276534	481	Escherichia coli
SAMN09276538	-	Escherichia coli
SAMN09276543	628	Escherichia coli
SAMN09276551	4	Escherichia coli
SAMN09276553	130	Escherichia coli
SAMN09276606	628	Escherichia coli
SAMN09276624	-	Escherichia coli
SAMN09276628	563	Escherichia coli
SAMN09276784	1092	Escherichia coli
SAMN09276786	628	Escherichia coli
SAMN09276791	-	Escherichia coli
SAMN09276794	1023	Escherichia coli
SAMN09276796	-	Escherichia coli
SAMN09276798	-	Escherichia coli
SAMN09276799	481	Escherichia coli
SAMN09276815	563	Escherichia coli
SAMN09276821	-	Escherichia coli
SAMN09276823	-	Escherichia coli
SAMN09276824	-	Escherichia coli
SAMN09276831	909	Escherichia coli
SAMN09276842	478	Escherichia coli
SAMN09276865	-	Escherichia coli
SAMN09277788	563	Escherichia coli
SAMN09284000	999	Escherichia coli
SAMN09284003	628	Escherichia coli
SAMN09284006	482	Escherichia coli
SAMN09284012	563	Escherichia coli
SAMN09284014	563	Escherichia coli
SAMN09284015	563	Escherichia coli
SAMN09284017	-	Escherichia coli
SAMN09284018	-	Escherichia coli
SAMN09284042	66	Escherichia coli
SAMN09284631	-	Escherichia coli
SAMN09284638	563	Escherichia coli
SAMN09284644	725	Escherichia coli
SAMN09284665	33	Escherichia coli
SAMN09284673	-	Escherichia coli
SAMN09284684	563	Escherichia coli
SAMN09284685	-	Escherichia coli
SAMN09284686	-	Escherichia coli
SAMN09284695	563	Escherichia coli
SAMN09284696	638	Escherichia coli
SAMN09284697	130	Escherichia coli
SAMN09284698	-	Escherichia coli
SAMN09284699	-	Escherichia coli
SAMN09284714	666	Escherichia coli
SAMN09284722	135	Escherichia coli
SAMN09284723	563	Escherichia coli
SAMN09284732	-	Escherichia coli
SAMN09284735	-	Escherichia coli
SAMN09284738	563	Escherichia coli
SAMN09284739	-	Escherichia coli
SAMN09284742	-	Escherichia coli
SAMN09284743	563	Escherichia coli
SAMN09284744	-	Escherichia coli
SAMN09284758	563	Escherichia coli
SAMN09284771	-	Escherichia coli
SAMN09284876	563	Escherichia coli
SAMN09284890	-	Escherichia coli
SAMN09284892	132	Escherichia coli
SAMN09284898	-	Escherichia coli
SAMN09284929	628	Escherichia coli
SAMN09284936	-	Escherichia coli
SAMN09285061	506	Escherichia coli
SAMN09285288	363	Escherichia coli
SAMN09290294	-	Escherichia coli
SAMN09290298	-	Escherichia coli
SAMN09290303	2	Escherichia coli
SAMN09290308	570	Escherichia coli
SAMN09290317	294	Escherichia coli
SAMN09290323	-	Escherichia coli
SAMN09290324	-	Escherichia coli
SAMN09290332	-	Escherichia coli
SAMN09290339	-	Escherichia coli
SAMN09290340	570	Escherichia coli
SAMN09290370	-	Escherichia coli
SAMN09290374	-	Escherichia coli
SAMN09290376	-	Escherichia coli
SAMN09290378	563	Escherichia coli
SAMN09290382	-	Escherichia coli
SAMN09290383	628	Escherichia coli
SAMN09290397	357	Escherichia coli
SAMN09290399	130	Escherichia coli
SAMN09290410	87	Escherichia coli
SAMN09290415	367	Escherichia coli
SAMN09290448	-	Escherichia coli
SAMN09290541	563	Escherichia coli
SAMN09294958	-	Escherichia coli
SAMN09294960	563	Escherichia coli
SAMN09294961	-	Escherichia coli
SAMN09294963	-	Escherichia coli
SAMN09294964	628	Escherichia coli
SAMN09294965	594	Escherichia coli
SAMN09294966	-	Escherichia coli
SAMN09294969	563	Escherichia coli
SAMN09294977	7	Escherichia coli
SAMN09294982	-	Escherichia coli
SAMN09294993	385	Escherichia coli
SAMN09295003	73	Escherichia coli
SAMN09295007	481	Escherichia coli
SAMN09295008	415	Escherichia coli
SAMN09295009	-	Escherichia coli
SAMN09295015	-	Escherichia coli
SAMN09295019	-	Escherichia coli
SAMN09295021	563	Escherichia coli
SAMN09295028	-	Escherichia coli
SAMN09295037	-	Escherichia coli
SAMN09295042	563	Escherichia coli
SAMN09295048	563	Escherichia coli
SAMN09295053	-	Escherichia coli
SAMN09295054	-	Escherichia coli
SAMN09295066	481	Escherichia coli
SAMN09295067	999	Escherichia coli
SAMN09295068	481	Escherichia coli
SAMN09295078	215	Escherichia coli
SAMN09295105	-	Escherichia coli
SAMN09295106	-	Escherichia coli
SAMN09295156	-	Escherichia coli
SAMN09298271	-	Escherichia coli
SAMN09298275	481	Escherichia coli
SAMN09298276	-	Escherichia coli
SAMN09298277	999	Escherichia coli
SAMN09298279	3	Escherichia coli
SAMN09298281	481	Escherichia coli
SAMN09298284	563	Escherichia coli
SAMN09298286	-	Escherichia coli
SAMN09298293	481	Escherichia coli
SAMN09298298	-	Escherichia coli
SAMN09298299	481	Escherichia coli
SAMN09298301	628	Escherichia coli
SAMN09298303	-	Escherichia coli
SAMN09298304	846	Escherichia coli
SAMN09298311	6	Escherichia coli
SAMN09298315	-	Escherichia coli
SAMN09298321	481	Escherichia coli
SAMN09298322	730	Escherichia coli
SAMN09298325	-	Escherichia coli
SAMN09298331	130	Escherichia coli
SAMN09298333	-	Escherichia coli
SAMN09298338	-	Escherichia coli
SAMN09298344	-	Escherichia coli
SAMN09298357	563	Escherichia coli
SAMN09298358	-	Escherichia coli
SAMN09298365	-	Escherichia coli
SAMN09298372	628	Escherichia coli
SAMN09298381	511	Escherichia coli
SAMN09298384	-	Escherichia coli
SAMN09302104	-	Escherichia coli
SAMN09302386	-	Escherichia coli
SAMN09302387	666	Escherichia coli
SAMN09302390	-	Escherichia coli
SAMN09302391	831	Escherichia coli
SAMN09302395	-	Escherichia coli
SAMN09302397	-	Escherichia coli
SAMN09302398	628	Escherichia coli
SAMN09302400	8	Escherichia coli
SAMN09302401	350	Escherichia coli
SAMN09302408	415	Escherichia coli
SAMN09302410	-	Escherichia coli
SAMN09302413	730	Escherichia coli
SAMN09302414	367	Escherichia coli
SAMN09302423	-	Escherichia coli
SAMN09302431	-	Escherichia coli
SAMN09302439	-	Escherichia coli
SAMN09302443	563	Escherichia coli
SAMN09302444	290	Escherichia coli
SAMN09302445	-	Escherichia coli
SAMN09302453	-	Escherichia coli
SAMN09302458	215	Escherichia coli
SAMN09302461	-	Escherichia coli
SAMN09302467	215	Escherichia coli
SAMN09341379	-	Escherichia coli
SAMN09343383	350	Escherichia coli
SAMN09343949	481	Escherichia coli
SAMN09344403	481	Escherichia coli
SAMN09344409	66	Escherichia coli
SAMN09344411	-	Escherichia coli
SAMN09344415	-	Escherichia coli
SAMN09344503	-	Escherichia coli
SAMN09344507	481	Escherichia coli
SAMN09344882	1	Escherichia coli
SAMN09344885	-	Escherichia coli
SAMN09345441	-	Escherichia coli
SAMN09345812	3	Escherichia coli
SAMN09345814	591	Escherichia coli
SAMN09345821	126	Escherichia coli
SAMN09345825	481	Escherichia coli
SAMN09346292	628	Escherichia coli
SAMN09346301	822	Escherichia coli
SAMN09346758	-	Escherichia coli
SAMN09347300	563	Escherichia coli
SAMN09347311	-	Escherichia coli
SAMN09347314	895	Escherichia coli
SAMN09348174	2	Escherichia coli
SAMN09348182	628	Escherichia coli
SAMN09349116	-	Escherichia coli
SAMN09371633	628	Escherichia coli
SAMN09371636	-	Escherichia coli
SAMN09371650	628	Escherichia coli
SAMN09371655	-	Escherichia coli
SAMN09371664	696	Escherichia coli
SAMN09371704	-	Escherichia coli
SAMN09371715	-	Escherichia coli
SAMN09371751	-	Escherichia coli
SAMN09371753	129	Escherichia coli
SAMN09371755	34	Escherichia coli
SAMN09371756	-	Escherichia coli
SAMN09371759	628	Escherichia coli
SAMN09371761	-	Escherichia coli
SAMN09371763	628	Escherichia coli
SAMN09371764	-	Escherichia coli
SAMN09371765	895	Escherichia coli
SAMN09371777	-	Escherichia coli
SAMN09371779	74	Escherichia coli
SAMN09371782	563	Escherichia coli
SAMN09371784	563	Escherichia coli
SAMN09371785	-	Escherichia coli
SAMN09371806	628	Escherichia coli
SAMN09371808	661	Escherichia coli
SAMN09371809	481	Escherichia coli
SAMN09371814	-	Escherichia coli
SAMN09371816	-	Escherichia coli
SAMN09371817	917	Escherichia coli
SAMN09371819	563	Escherichia coli
SAMN09371820	481	Escherichia coli
SAMN09371822	-	Escherichia coli
SAMN09371826	-	Escherichia coli
SAMN09371828	3	Escherichia coli
SAMN09371838	-	Escherichia coli
SAMN09371852	1023	Escherichia coli
SAMN09372338	-	Escherichia coli
SAMN09372349	420	Escherichia coli
SAMN09372351	43	Escherichia coli
SAMN09372354	563	Escherichia coli
SAMN09372375	-	Escherichia coli
SAMN09372427	-	Escherichia coli
SAMN09372431	563	Escherichia coli
SAMN09372433	-	Escherichia coli
SAMN09372436	-	Escherichia coli
SAMN09372439	-	Escherichia coli
SAMN09372442	563	Escherichia coli
SAMN09372443	-	Escherichia coli
SAMN09372452	-	Escherichia coli
SAMN09372465	563	Escherichia coli
SAMN09372466	-	Escherichia coli
SAMN09372468	-	Escherichia coli
SAMN09372471	-	Escherichia coli
SAMN09372475	-	Escherichia coli
SAMN09372477	591	Escherichia coli
SAMN09372481	350	Escherichia coli
SAMN09372485	2	Escherichia coli
SAMN09372486	-	Escherichia coli
SAMN09372488	546	Escherichia coli
SAMN09372489	367	Escherichia coli
SAMN09372490	-	Escherichia coli
SAMN09372493	481	Escherichia coli
SAMN09375157	-	Escherichia coli
SAMN09375158	43	Escherichia coli
SAMN09375159	477	Escherichia coli
SAMN09375175	506	Escherichia coli
SAMN09375801	-	Escherichia coli
SAMN09375802	-	Escherichia coli
SAMN09375803	480	Escherichia coli
SAMN09375808	-	Escherichia coli
SAMN09375809	-	Escherichia coli
SAMN09375813	-	Escherichia coli
SAMN09375814	563	Escherichia coli
SAMN09375819	-	Escherichia coli
SAMN09375822	350	Escherichia coli
SAMN09375823	563	Escherichia coli
SAMN09375828	-	Escherichia coli
SAMN09375829	564	Escherichia coli
SAMN09375830	357	Escherichia coli
SAMN09376448	215	Escherichia coli
SAMN09376454	-	Escherichia coli
SAMN09376659	-	Escherichia coli
SAMN09376660	-	Escherichia coli
SAMN09376666	-	Escherichia coli
SAMN09376672	-	Escherichia coli
SAMN09376675	628	Escherichia coli
SAMN09376697	-	Escherichia coli
SAMN09376701	314	Escherichia coli
SAMN09376703	481	Escherichia coli
SAMN09377528	-	Escherichia coli
SAMN09380246	-	Escherichia coli
SAMN09380249	-	Escherichia coli
SAMN09380250	1	Escherichia coli
SAMN09380255	-	Escherichia coli
SAMN09380257	563	Escherichia coli
SAMN09380260	563	Escherichia coli
SAMN09380263	87	Escherichia coli
SAMN09380264	-	Escherichia coli
SAMN09380309	-	Escherichia coli
SAMN09380310	-	Escherichia coli
SAMN09380311	481	Escherichia coli
SAMN09380312	481	Escherichia coli
SAMN09380319	-	Escherichia coli
SAMN09380328	-	Escherichia coli
SAMN09380330	-	Escherichia coli
SAMN09380333	-	Escherichia coli
SAMN09380336	563	Escherichia coli
SAMN09380339	-	Escherichia coli
SAMN09380341	43	Escherichia coli
SAMN09380343	481	Escherichia coli
SAMN09380344	563	Escherichia coli
SAMN09380346	-	Escherichia coli
SAMN09380348	-	Escherichia coli
SAMN09380349	-	Escherichia coli
SAMN09380350	-	Escherichia coli
SAMN09380356	415	Escherichia coli
SAMN09380358	628	Escherichia coli
SAMN09380364	893	Escherichia coli
SAMN09380365	51	Escherichia coli
SAMN09380367	-	Escherichia coli
SAMN09380378	-	Escherichia coli
SAMN09380379	-	Escherichia coli
SAMN09380381	7	Escherichia coli
SAMN09380384	563	Escherichia coli
SAMN09380387	-	Escherichia coli
SAMN09380390	135	Escherichia coli
SAMN09380391	-	Escherichia coli
SAMN09380392	-	Escherichia coli
SAMN09380400	563	Escherichia coli
SAMN09380401	563	Escherichia coli
SAMN09380408	-	Escherichia coli
SAMN09380411	4	Escherichia coli
SAMN09380413	8	Escherichia coli
SAMN09380419	563	Escherichia coli
SAMN09380426	563	Escherichia coli
SAMN09380434	-	Escherichia coli
SAMN09380441	-	Escherichia coli
SAMN09380526	-	Escherichia coli
SAMN09380552	215	Escherichia coli
SAMN09384639	-	Escherichia coli
SAMN09384642	546	Escherichia coli
SAMN09384647	546	Escherichia coli
SAMN09384648	-	Escherichia coli
SAMN09384657	-	Escherichia coli
SAMN09384659	-	Escherichia coli
SAMN09384661	-	Escherichia coli
SAMN09384664	563	Escherichia coli
SAMN09384666	-	Escherichia coli
SAMN09384667	480	Escherichia coli
SAMN09384668	1023	Escherichia coli
SAMN09384671	-	Escherichia coli
SAMN09384676	-	Escherichia coli
SAMN09385680	481	Escherichia coli
SAMN09385681	-	Escherichia coli
SAMN09385683	628	Escherichia coli
SAMN09385695	-	Escherichia coli
SAMN09385696	-	Escherichia coli
SAMN09385697	628	Escherichia coli
SAMN09385702	-	Escherichia coli
SAMN09385703	-	Escherichia coli
SAMN09385705	32	Escherichia coli
SAMN09385734	-	Escherichia coli
SAMN09385742	-	Escherichia coli
SAMN09385744	-	Escherichia coli
SAMN09385748	1092	Escherichia coli
SAMN09385753	350	Escherichia coli
SAMN09385756	-	Escherichia coli
SAMN09385794	-	Escherichia coli
SAMN09385796	130	Escherichia coli
SAMN09385828	563	Escherichia coli
SAMN09385830	-	Escherichia coli
SAMN09385831	-	Escherichia coli
SAMN09385832	415	Escherichia coli
SAMN09385833	-	Escherichia coli
SAMN09385839	1010	Escherichia coli
SAMN09385840	628	Escherichia coli
SAMN09385843	43	Escherichia coli
SAMN09385844	-	Escherichia coli
SAMN09385845	481	Escherichia coli
SAMN09385848	215	Escherichia coli
SAMN09385853	-	Escherichia coli
SAMN09385857	563	Escherichia coli
SAMN09385858	-	Escherichia coli
SAMN09385860	628	Escherichia coli
SAMN09385867	563	Escherichia coli
SAMN09385872	480	Escherichia coli
SAMN09385875	563	Escherichia coli
SAMN09386238	367	Escherichia coli
SAMN09386239	628	Escherichia coli
SAMN09386240	591	Escherichia coli
SAMN09386244	8	Escherichia coli
SAMN09386245	-	Escherichia coli
SAMN09387367	-	Escherichia coli
SAMN09387369	-	Escherichia coli
SAMN09387373	-	Escherichia coli
SAMN09387378	-	Escherichia coli
SAMN09387379	4	Escherichia coli
SAMN09387380	511	Escherichia coli
SAMN09387381	-	Escherichia coli
SAMN09387383	-	Escherichia coli
SAMN09387384	-	Escherichia coli
SAMN09387388	-	Escherichia coli
SAMN09387389	350	Escherichia coli
SAMN09387392	350	Escherichia coli
SAMN09387398	1023	Escherichia coli
SAMN09387399	-	Escherichia coli
SAMN09387401	591	Escherichia coli
SAMN09387403	481	Escherichia coli
SAMN09387408	563	Escherichia coli
SAMN09387413	-	Escherichia coli
SAMN09387419	-	Escherichia coli
SAMN09387427	-	Escherichia coli
SAMN09387429	628	Escherichia coli
SAMN09387431	350	Escherichia coli
SAMN09387432	-	Escherichia coli
SAMN09387433	628	Escherichia coli
SAMN09387435	628	Escherichia coli
SAMN09387436	-	Escherichia coli
SAMN09387441	563	Escherichia coli
SAMN09387443	-	Escherichia coli
SAMN09387444	-	Escherichia coli
SAMN09387445	-	Escherichia coli
SAMN09387446	563	Escherichia coli
SAMN09387448	-	Escherichia coli
SAMN09387449	563	Escherichia coli
SAMN09387450	563	Escherichia coli
SAMN09387452	135	Escherichia coli
SAMN09387453	-	Escherichia coli
SAMN09387454	-	Escherichia coli
SAMN09387456	-	Escherichia coli
SAMN09387651	563	Escherichia coli
SAMN09387653	-	Escherichia coli
SAMN09387658	-	Escherichia coli
SAMN09387660	48	Escherichia coli
SAMN09387661	628	Escherichia coli
SAMN09387669	-	Escherichia coli
SAMN09387670	-	Escherichia coli
SAMN09387671	638	Escherichia coli
SAMN09387672	-	Escherichia coli
SAMN09387675	-	Escherichia coli
SAMN09387676	563	Escherichia coli
SAMN09387679	-	Escherichia coli
SAMN09387683	-	Escherichia coli
SAMN09387686	563	Escherichia coli
SAMN09387687	-	Escherichia coli
SAMN09387690	628	Escherichia coli
SAMN09387692	-	Escherichia coli
SAMN09387697	1023	Escherichia coli
SAMN09387700	7	Escherichia coli
SAMN09387704	563	Escherichia coli
SAMN09387715	350	Escherichia coli
SAMN09387720	-	Escherichia coli
SAMN09387721	1092	Escherichia coli
SAMN09387723	628	Escherichia coli
SAMN09387730	563	Escherichia coli
SAMN09387735	666	Escherichia coli
SAMN09387736	-	Escherichia coli
SAMN09387739	34	Escherichia coli
SAMN09387741	-	Escherichia coli
SAMN09387744	-	Escherichia coli
SAMN09387745	-	Escherichia coli
SAMN09387746	481	Escherichia coli
SAMN09387752	-	Escherichia coli
SAMN09387758	-	Escherichia coli
SAMN09387874	628	Escherichia coli
SAMN09388376	481	Escherichia coli
SAMN09388378	481	Escherichia coli
SAMN09388380	-	Escherichia coli
SAMN09388381	-	Escherichia coli
SAMN09388384	139	Escherichia coli
SAMN09388386	-	Escherichia coli
SAMN09388389	628	Escherichia coli
SAMN09388399	-	Escherichia coli
SAMN09388402	-	Escherichia coli
SAMN09388404	-	Escherichia coli
SAMN09388405	404	Escherichia coli
SAMN09388407	-	Escherichia coli
SAMN09388408	628	Escherichia coli
SAMN09388409	4	Escherichia coli
SAMN09388418	481	Escherichia coli
SAMN09388422	-	Escherichia coli
SAMN09388427	563	Escherichia coli
SAMN09388429	563	Escherichia coli
SAMN09388430	-	Escherichia coli
SAMN09388433	350	Escherichia coli
SAMN09388434	628	Escherichia coli
SAMN09388436	-	Escherichia coli
SAMN09388442	563	Escherichia coli
SAMN09388452	-	Escherichia coli
SAMN09388455	-	Escherichia coli
SAMN09388456	-	Escherichia coli
SAMN09388460	563	Escherichia coli
SAMN09388473	390	Escherichia coli
SAMN09388483	357	Escherichia coli
SAMN09388485	563	Escherichia coli
SAMN09388486	7	Escherichia coli
SAMN09388487	563	Escherichia coli
SAMN09388493	-	Escherichia coli
SAMN09388497	-	Escherichia coli
SAMN09388503	-	Escherichia coli
SAMN09388506	-	Escherichia coli
SAMN09388508	563	Escherichia coli
SAMN09388514	481	Escherichia coli
SAMN09388517	563	Escherichia coli
SAMN09388518	628	Escherichia coli
SAMN09388521	-	Escherichia coli
SAMN09388523	-	Escherichia coli
SAMN09388527	563	Escherichia coli
SAMN09388531	-	Escherichia coli
SAMN09388537	-	Escherichia coli
SAMN09388539	-	Escherichia coli
SAMN09388540	563	Escherichia coli
SAMN09388541	-	Escherichia coli
SAMN09388544	-	Escherichia coli
SAMN09388556	562	Escherichia coli
SAMN09388557	-	Escherichia coli
SAMN09388558	-	Escherichia coli
SAMN09388561	350	Escherichia coli
SAMN09388564	628	Escherichia coli
SAMN09388566	-	Escherichia coli
SAMN09388569	74	Escherichia coli
SAMN09388571	350	Escherichia coli
SAMN09388576	-	Escherichia coli
SAMN09388577	135	Escherichia coli
SAMN09388580	-	Escherichia coli
SAMN09388588	-	Escherichia coli
SAMN09388589	563	Escherichia coli
SAMN09388592	628	Escherichia coli
SAMN09388594	126	Escherichia coli
SAMN09388596	-	Escherichia coli
SAMN09388599	-	Escherichia coli
SAMN09388606	563	Escherichia coli
SAMN09388611	-	Escherichia coli
SAMN09388612	563	Escherichia coli
SAMN09388614	645	Escherichia coli
SAMN09388617	-	Escherichia coli
SAMN09388620	563	Escherichia coli
SAMN09388622	-	Escherichia coli
SAMN09388625	563	Escherichia coli
SAMN09388628	-	Escherichia coli
SAMN09388629	917	Escherichia coli
SAMN09388632	-	Escherichia coli
SAMN09388633	290	Escherichia coli
SAMN09388637	563	Escherichia coli
SAMN09388641	-	Escherichia coli
SAMN09388656	-	Escherichia coli
SAMN09388657	294	Escherichia coli
SAMN09388677	-	Escherichia coli
SAMN09388687	563	Escherichia coli
SAMN09388726	-	Escherichia coli
SAMN09388729	21	Escherichia coli
SAMN09388760	36	Escherichia coli
SAMN09395132	563	Escherichia coli
SAMN09395135	481	Escherichia coli
SAMN09395136	-	Escherichia coli
SAMN09395139	563	Escherichia coli
SAMN09395140	563	Escherichia coli
SAMN09395147	563	Escherichia coli
SAMN09395149	139	Escherichia coli
SAMN09395165	628	Escherichia coli
SAMN09395166	628	Escherichia coli
SAMN09395167	563	Escherichia coli
SAMN09395186	481	Escherichia coli
SAMN09395187	628	Escherichia coli
SAMN09395188	563	Escherichia coli
SAMN09395191	3	Escherichia coli
SAMN09395214	-	Escherichia coli
SAMN09395230	-	Escherichia coli
SAMN09395240	-	Escherichia coli
SAMN09395245	135	Escherichia coli
SAMN09395268	563	Escherichia coli
SAMN09395280	-	Escherichia coli
SAMN09395284	-	Escherichia coli
SAMN09395301	481	Escherichia coli
SAMN09395304	1023	Escherichia coli
SAMN09395305	628	Escherichia coli
SAMN09395306	-	Escherichia coli
SAMN09395311	415	Escherichia coli
SAMN09395399	-	Escherichia coli
SAMN09395402	628	Escherichia coli
SAMN09395404	628	Escherichia coli
SAMN09395407	-	Escherichia coli
SAMN09395411	1010	Escherichia coli
SAMN09395413	481	Escherichia coli
SAMN09395418	628	Escherichia coli
SAMN09395423	1023	Escherichia coli
SAMN09395426	481	Escherichia coli
SAMN09395433	-	Escherichia coli
SAMN09395439	-	Escherichia coli
SAMN09395445	-	Escherichia coli
SAMN09395446	563	Escherichia coli
SAMN09395450	-	Escherichia coli
SAMN09395475	563	Escherichia coli
SAMN09395477	-	Escherichia coli
SAMN09395489	350	Escherichia coli
SAMN09395495	1019	Escherichia coli
SAMN09395522	165	Escherichia coli
SAMN09395531	-	Escherichia coli
SAMN09395535	960	Escherichia coli
SAMN09395540	-	Escherichia coli
SAMN09395542	628	Escherichia coli
SAMN09395544	563	Escherichia coli
SAMN09395550	-	Escherichia coli
SAMN09395552	628	Escherichia coli
SAMN09395556	563	Escherichia coli
SAMN09395559	-	Escherichia coli
SAMN09395568	-	Escherichia coli
SAMN09395570	-	Escherichia coli
SAMN09395575	-	Escherichia coli
SAMN09395661	357	Escherichia coli
SAMN09395673	563	Escherichia coli
SAMN09395702	628	Escherichia coli
SAMN09395817	-	Escherichia coli
SAMN09395878	-	Escherichia coli
SAMN09395883	-	Escherichia coli
SAMN09395886	591	Escherichia coli
SAMN09395903	563	Escherichia coli
SAMN09396015	563	Escherichia coli
SAMN09396021	563	Escherichia coli
SAMN09396027	-	Escherichia coli
SAMN09396066	-	Escherichia coli
SAMN09396188	29	Escherichia coli
SAMN09396190	-	Escherichia coli
SAMN09396192	563	Escherichia coli
SAMN09396196	-	Escherichia coli
SAMN09396209	-	Escherichia coli
SAMN09396407	-	Escherichia coli
SAMN09396412	-	Escherichia coli
SAMN09396434	628	Escherichia coli
SAMN09396479	-	Escherichia coli
SAMN09396526	563	Escherichia coli
SAMN09396528	-	Escherichia coli
SAMN09396531	3	Escherichia coli
SAMN09396532	563	Escherichia coli
SAMN09396540	-	Escherichia coli
SAMN09396546	563	Escherichia coli
SAMN09396563	-	Escherichia coli
SAMN09396566	682	Escherichia coli
SAMN09396568	-	Escherichia coli
SAMN09396569	563	Escherichia coli
SAMN09396578	563	Escherichia coli
SAMN09396620	-	Escherichia coli
SAMN09443946	30	Escherichia coli
SAMN09443951	-	Escherichia coli
SAMN09443970	130	Escherichia coli
SAMN09443971	52	Escherichia coli
SAMN09443974	-	Escherichia coli
SAMN09443977	481	Escherichia coli
SAMN09443984	1	Escherichia coli
SAMN09443992	-	Escherichia coli
SAMN09444002	563	Escherichia coli
SAMN09444016	572	Escherichia coli
SAMN09444017	563	Escherichia coli
SAMN09444025	2	Escherichia coli
SAMN09444026	1023	Escherichia coli
SAMN09444027	-	Escherichia coli
SAMN09444028	-	Escherichia coli
SAMN09444038	-	Escherichia coli
SAMN09444039	-	Escherichia coli
SAMN09444041	563	Escherichia coli
SAMN09444042	-	Escherichia coli
SAMN09444043	-	Escherichia coli
SAMN09444044	1092	Escherichia coli
SAMN09444048	666	Escherichia coli
SAMN09444049	-	Escherichia coli
SAMN09444082	682	Escherichia coli
SAMN09444083	-	Escherichia coli
SAMN09444089	628	Escherichia coli
SAMN09444092	350	Escherichia coli
SAMN09444169	290	Escherichia coli
SAMN09444171	-	Escherichia coli
SAMN09444175	632	Escherichia coli
SAMN09444176	563	Escherichia coli
SAMN09444180	-	Escherichia coli
SAMN09444185	628	Escherichia coli
[truncated: 4,851 more rows]

## Sheet: Supplementary Table 5
Antimicrobial class	Antimicrobial
Pleuromutilin	tiamulin
aminocyclitol	spectinomycin
Aminoglycoside	gentamicin
Aminoglycoside	tobramycin
Aminoglycoside	amikacin
Aminoglycoside	netilmicin
Aminoglycoside	isepamicin
Aminoglycoside	streptomycin
Aminoglycoside	kanamycin
Aminoglycoside	fortimicin
Aminoglycoside	dibekacin
Aminoglycoside	sisomycin
Aminoglycoside	spiramycin
Aminoglycoside	ribostamycin
Aminoglycoside	neomycin
Aminoglycoside	astromicin
Aminoglycoside	butirosin
Aminoglycoside	lividomycin
Aminoglycoside	paromomycin
Aminoglycoside	sisomicin
Aminoglycoside	apramycin
Antpseudomonal penicillin + beta-lactamase inhibitor	piperacillin-tazobactam
Antpseudomonal penicillin + beta-lactamase inhibitor	ticarcillin-clavulanic acid
Penicillins	ampicillin
Penicillins	amoxicillin
Penicillins	penicillin
Penicillins	ticarcillin
Penicillins	piperacillin
Carbapenems	ertapenem
Carbapenems	imipenem
Carbapenems	meropenem
Carbapenems	doripenem
2nd generation cephalosporins	cefazolin
2nd generation cephalosporins	cefuroxime
2nd generation cephalosporins	cephalothin
Extended spectrum cephalosporins	cefotaxime
Extended spectrum cephalosporins	ceftriaxone
Extended spectrum cephalosporins	ceftazidime
Extended spectrum cephalosporins	cefepime
Extended spectrum cephalosporins	cefixime
monobactams	aztreonam
Penicillins and beta-lactamase inhibitors	amoxicillin-clavulanic acid
Penicillins and beta-lactamase inhibitors	ampicillin-clavulanic acid
Anti-staph beta-lactams	oxacillin
Anti-staph beta-lactams	cefoxitin
Anti-staph beta-lactams	flucloxacillin
Anti-staph beta-lactams	presence of meca geneÂ Â
Fluoroquinolone	ciprofloxacin
Fluoroquinolone	moxifloxacin
Fluoroquinolone	levofloxacin
Fluoroquinolone	nalidixic acid
Fluoroquinolone	fluoroquinolone
Folate inhibitors	sulfamethoxazole
Folate inhibitors	trimethoprim
cephamycins	fusidic acid
Glycopeptides	vancomycin
Glycopeptides	teicoplanin
Glycopeptides	telavancin
Glycopeptides	bleomycin
Lincosamides	clindamycin
Lincosamides	lincomycin
Macrolides	erythromycin
Macrolides	azithromycin
Macrolides	clarithromycin
Macrolides	telithromycin
Mupirocins	mupirocin
Oxazolidinones	linezolid
Phenicols	chloramphenicol
Phosphonic acid	fosfomycin
Polymyxin	colistin
Polymyxin	polymyxin b
Rifamycins	rifampicin
Streptogramin	quinupristin
Streptogramin	dalfopristin
Streptogramin	virginiamycin s
Streptogramin	virginiamycin m
Streptogramin	pristinamycin ia
Streptogramin	pristinamycin iia
Streptogramin	quinupristin-dalfopristin
Tetracyclines	tetracycline
Tetracyclines	doxycycline
Tetracyclines	minocycline
Tetracyclines	tigecycline
Others	salinomycin
Others	salinomycin
Others	maduramicin
Others	narasin

## Sheet: Supplementary Table 6
Intrinsic/chromosomal AMR gene	Bacterial species
msr(E)	Acinetobacter baumannii
blaSHV-182	Klebsiella pneumoniae
blaSHV-159	Klebsiella pneumoniae
blaSHV-158	Klebsiella pneumoniae
blaSHV-199	Klebsiella pneumoniae
blaSHV-194	Klebsiella pneumoniae
blaSHV-179	Klebsiella pneumoniae
blaSHV-145	Klebsiella pneumoniae
blaOXA-66	Acinetobacter baumannii
blaADC-25	Acinetobacter baumannii
blaOXA-486	Pseudomonas aeruginosa
blaOXA-494	Pseudomonas aeruginosa
blaTER-2	Klebsiella terrigena
blaOXA-488	Pseudomonas aeruginosa
blaOXA-486	Pseudomonas aeruginosa
blaSHV-172	Klebsiella pneumoniae
cepA-29	Bacteroides fragilis
cepA	Bacteroides fragilis
cepA	Bacteroides fragilis
blaOXA-488	Pseudomonas aeruginosa
blaSHV-182	Klebsiella pneumoniae
blaSHV-159	Klebsiella pneumoniae
blaSHV-158	Klebsiella pneumoniae
blaOXA-66	Acinetobacter baumannii
blaADC-25	Acinetobacter baumannii
aac(3)-XI	Corynebacterium striatum
aph(3')-IIb	Pseudomonas aeruginosa
OqxB	Klebsiella pneumoniae
OqxA	Klebsiella pneumoniae
OqxB	Klebsiella pneumoniae
OqxA	Klebsiella pneumoniae
OqxB	Klebsiella pneumoniae
OqxA	Klebsiella pneumoniae
OqxB	Klebsiella grimontii
OqxB	Klebsiella pneumoniae
OqxA	Klebsiella pneumoniae
OqxB	Klebsiella grimontii
OqxB	Klebsiella pneumoniae
OqxA	Klebsiella pneumoniae
OqxB	Klebsiella pneumoniae
OqxA	Klebsiella pneumoniae
OqxB	Klebsiella pneumoniae
OqxA	Klebsiella pneumoniae
OqxB	Klebsiella pneumoniae
OqxA	Klebsiella pneumoniae
OqxB	Klebsiella grimontii
aac(6')-Ic	Serratia bockelmannii
aac(6')-Ii	Enterococcus_B faecium
aac(6')-Ii	Enterococcus_B faecium
aac(6')-Ii	Enterococcus_B faecium
blaSHV-26	Klebsiella pneumoniae
blaOXY-1-5	Klebsiella michiganensis
blaACT-15	Enterobacter hormaechei_B
blaOXY-6-4	Klebsiella grimontii
blaMAL-1	Citrobacter_B koseri
blaOXY-1-7	Klebsiella michiganensis
blaOXY-6-2	Klebsiella grimontii
blaMAL-1	Citrobacter_B koseri
blaOXY-1-5	Klebsiella michiganensis
blaMAL-1	Citrobacter_B koseri
blaSHV-56	Klebsiella pneumoniae
blaOXY-6-2	Klebsiella grimontii
blaCMY-150	Citrobacter freundii
blaDHA-17	Morganella morganii
blaSHV-78	Klebsiella pneumoniae
blaSHV-26	Klebsiella pneumoniae
blaOXY-1-5	Klebsiella michiganensis
blaSHV-75	Klebsiella pneumoniae
blaSHV-75	Klebsiella pneumoniae
blaSHV-11	Klebsiella pneumoniae
blaSHV-70	Klebsiella pneumoniae
blaSHV-13	Klebsiella pneumoniae
blaACT-15	Enterobacter hormaechei_B
blaOXY-6-4	Klebsiella grimontii
blaMAL-1	Citrobacter_B koseri
blaOXY-1-7	Klebsiella michiganensis
blaOXY-6-2	Klebsiella grimontii
blaMAL-1	Citrobacter_B koseri
blaOXY-1-5	Klebsiella michiganensis
blaMAL-1	Citrobacter_B koseri
blaSHV-89	Klebsiella pneumoniae
blaSHV-85	Klebsiella pneumoniae
blaSHV-79	Klebsiella pneumoniae
blaSHV-56	Klebsiella pneumoniae
blaSHV-40	Klebsiella pneumoniae
blaOXY-6-2	Klebsiella grimontii
blaCMY-150	Citrobacter freundii
blaDHA-17	Morganella morganii
aac(6')-Ic	Serratia bockelmannii
aac(6')-Ii	Enterococcus_B faecium
aac(6')-Ii	Enterococcus_B faecium
aac(6')-Ii	Enterococcus_B faecium
msr(E)	Acinetobacter baumannii
msr(E)	Acinetobacter baumannii
msr(E)	Acinetobacter baumannii
msr(E)	Acinetobacter baumannii
blaSHV-26	Klebsiella pneumoniae
mecA	Staphylococcus epidermidis
blaOXY-1-5	Klebsiella michiganensis
mecA	Staphylococcus haemolyticus
blaACT-15	Enterobacter hormaechei_B
mecA	Staphylococcus epidermidis
blaOXY-6-4	Klebsiella grimontii
mecA	Staphylococcus epidermidis
blaOXY-1-7	Klebsiella michiganensis
blaOXY-6-2	Klebsiella grimontii
mecA	Staphylococcus epidermidis
mecA	Staphylococcus epidermidis
blaOXY-1-5	Klebsiella michiganensis
blaSHV-56	Klebsiella pneumoniae
mecA	Staphylococcus epidermidis
blaOXY-6-2	Klebsiella grimontii
blaCMY-150	Citrobacter freundii
mecA	Staphylococcus haemolyticus
blaDHA-17	Morganella morganii
blaSHV-98	Klebsiella pneumoniae
blaSHV-78	Klebsiella pneumoniae
blaSHV-26	Klebsiella pneumoniae
mecA	Staphylococcus epidermidis
blaOXY-1-5	Klebsiella michiganensis
blaZ	Staphylococcus aureus
blaBRO-1	Moraxella catarrhalis
blaZ	Staphylococcus aureus
blaZ	Staphylococcus aureus
blaZ	Staphylococcus aureus
blaZ	Staphylococcus aureus
blaZ	Staphylococcus aureus
blaSHV-75	Klebsiella pneumoniae
blaZ	Staphylococcus aureus
mecA	Staphylococcus haemolyticus
blaSHV-75	Klebsiella pneumoniae
blaSHV-11	Klebsiella pneumoniae
blaSHV-70	Klebsiella pneumoniae
blaSHV-13	Klebsiella pneumoniae
blaACT-15	Enterobacter hormaechei_B
mecA	Staphylococcus epidermidis
blaZ	Staphylococcus epidermidis
blaZ	Staphylococcus epidermidis
blaZ	Staphylococcus epidermidis
blaZ	Staphylococcus epidermidis
blaZ	Staphylococcus epidermidis
blaZ	Staphylococcus epidermidis
blaZ	Staphylococcus epidermidis
blaZ	Staphylococcus epidermidis
blaOXY-6-4	Klebsiella grimontii
blaZ	Staphylococcus epidermidis
blaZ	Staphylococcus epidermidis
blaZ	Staphylococcus epidermidis
blaZ	Staphylococcus epidermidis
blaZ	Staphylococcus epidermidis
blaZ	Staphylococcus epidermidis
blaZ	Staphylococcus epidermidis
blaZ	Staphylococcus epidermidis
mecA	Staphylococcus epidermidis
blaMAL-1	Citrobacter_B koseri
blaOXY-1-7	Klebsiella michiganensis
blaOXY-6-2	Klebsiella grimontii
mecA	Staphylococcus epidermidis
blaZ	Staphylococcus epidermidis
blaZ	Staphylococcus epidermidis
blaZ	Staphylococcus epidermidis
blaZ	Staphylococcus epidermidis
blaZ	Staphylococcus epidermidis
blaZ	Staphylococcus epidermidis
blaZ	Staphylococcus epidermidis
blaZ	Staphylococcus epidermidis
blaZ	Staphylococcus epidermidis
blaZ	Staphylococcus epidermidis
blaZ	Staphylococcus epidermidis
blaZ	Staphylococcus epidermidis
blaZ	Staphylococcus epidermidis
blaZ	Staphylococcus epidermidis
blaZ	Staphylococcus epidermidis
blaZ	Staphylococcus epidermidis
blaZ	Staphylococcus aureus
blaBRO-1	Moraxella catarrhalis
blaZ	Staphylococcus epidermidis
blaMAL-1	Citrobacter_B koseri
blaOXY-1-5	Klebsiella michiganensis
blaMAL-1	Citrobacter_B koseri
blaSHV-89	Klebsiella pneumoniae
blaSHV-85	Klebsiella pneumoniae
blaSHV-79	Klebsiella pneumoniae
blaSHV-56	Klebsiella pneumoniae
blaSHV-40	Klebsiella pneumoniae
blaBRO-2	Moraxella catarrhalis
mecA	Staphylococcus epidermidis
blaZ	Staphylococcus epidermidis
blaBRO-2	Moraxella catarrhalis
blaZ	Staphylococcus aureus
blaOXY-6-2	Klebsiella grimontii
blaCMY-150	Citrobacter freundii
blaZ	Staphylococcus haemolyticus
mecA	Staphylococcus haemolyticus
blaDHA-17	Morganella morganii
blaZ	Staphylococcus aureus
blaBRO-1	Moraxella catarrhalis
blaZ	Staphylococcus aureus
blaZ	Staphylococcus aureus
blaZ	Staphylococcus aureus
blaZ	Staphylococcus aureus
blaBRO-1	Moraxella catarrhalis
blaZ	Staphylococcus aureus
blaZ	Staphylococcus aureus
blaZ	Staphylococcus aureus
blaZ	Staphylococcus aureus
blaZ	Staphylococcus aureus
blaZ	Staphylococcus aureus
blaZ	Staphylococcus epidermidis
blaZ	Staphylococcus epidermidis
blaZ	Staphylococcus epidermidis
blaZ	Staphylococcus epidermidis
blaZ	Staphylococcus epidermidis
blaZ	Staphylococcus epidermidis
blaZ	Staphylococcus epidermidis
blaZ	Staphylococcus epidermidis
blaZ	Staphylococcus aureus
blaZ	Staphylococcus epidermidis
blaZ	Staphylococcus epidermidis
blaZ	Staphylococcus epidermidis
blaZ	Staphylococcus epidermidis
blaZ	Staphylococcus epidermidis
blaZ	Staphylococcus epidermidis
blaZ	Staphylococcus epidermidis
blaZ	Staphylococcus epidermidis
blaZ	Staphylococcus epidermidis
blaZ	Staphylococcus epidermidis
blaZ	Staphylococcus epidermidis
blaZ	Staphylococcus epidermidis
blaZ	Staphylococcus epidermidis
blaZ	Staphylococcus epidermidis
blaZ	Staphylococcus epidermidis
blaZ	Staphylococcus epidermidis
blaZ	Staphylococcus epidermidis
blaZ	Staphylococcus epidermidis
blaZ	Staphylococcus epidermidis
blaZ	Staphylococcus epidermidis
blaZ	Staphylococcus epidermidis
blaZ	Staphylococcus epidermidis
blaZ	Staphylococcus epidermidis
blaZ	Staphylococcus epidermidis
blaZ	Staphylococcus aureus
blaBRO-1	Moraxella catarrhalis
blaZ	Staphylococcus epidermidis
blaBRO-2	Moraxella catarrhalis
blaZ	Staphylococcus epidermidis
blaBRO-2	Moraxella catarrhalis
blaZ	Staphylococcus aureus
blaZ	Staphylococcus haemolyticus
blaZ	Staphylococcus aureus
blaBRO-1	Moraxella catarrhalis
blaZ	Staphylococcus aureus
blaZ	Staphylococcus aureus
blaZ	Staphylococcus aureus
aph(3')-IIc	Stenotrophomonas maltophilia
aac(6')-Ic	Serratia bockelmannii
aac(6')-Ii	Enterococcus_B faecium
aac(6')-Ii	Enterococcus_B faecium
aac(6')-Ii	Enterococcus_B faecium
aph(3')-IIc	Stenotrophomonas maltophilia
OqxB	Klebsiella pneumoniae
OqxA	Klebsiella pneumoniae
OqxB	Klebsiella pneumoniae
OqxA	Klebsiella pneumoniae
OqxB	Klebsiella pneumoniae
OqxA	Klebsiella pneumoniae
OqxB	Klebsiella pneumoniae
OqxA	Klebsiella pneumoniae
OqxB	Klebsiella pneumoniae
OqxA	Klebsiella pneumoniae
OqxB	Klebsiella pneumoniae
OqxA	Klebsiella pneumoniae
OqxB	Klebsiella grimontii
OqxB	Klebsiella pneumoniae
OqxA	Klebsiella pneumoniae
OqxB	Klebsiella grimontii
OqxB	Klebsiella pneumoniae
OqxA	Klebsiella pneumoniae
OqxB	Klebsiella pneumoniae
OqxA	Klebsiella pneumoniae
OqxB	Klebsiella pneumoniae
OqxA	Klebsiella pneumoniae
OqxB	Klebsiella pneumoniae
OqxA	Klebsiella pneumoniae
OqxB	Klebsiella grimontii
mecA	Staphylococcus epidermidis
blaOXA-396	Pseudomonas aeruginosa
blaOXA-396	Pseudomonas aeruginosa
mecA	Staphylococcus haemolyticus
mecA	Staphylococcus epidermidis
mecA	Staphylococcus epidermidis
mecA	Staphylococcus epidermidis
mecA	Staphylococcus epidermidis
mecA	Staphylococcus epidermidis
mecA	Staphylococcus haemolyticus
aph(3')-IIc	Stenotrophomonas maltophilia
mecA	Staphylococcus epidermidis
mecA	Staphylococcus haemolyticus
mecA	Staphylococcus epidermidis
mecA	Staphylococcus epidermidis
mecA	Staphylococcus epidermidis
mecA	Staphylococcus epidermidis
mecA	Staphylococcus epidermidis
mecA	Staphylococcus haemolyticus
aac(6')-Ii	Enterococcus_B faecium
aac(6')-Ii	Enterococcus_B faecium
aac(6')-Ii	Enterococcus_B faecium
fosA6	Klebsiella pneumoniae
fosA	Klebsiella pneumoniae
fosA6	Klebsiella pneumoniae
fosA6	Klebsiella pneumoniae
fosA	Klebsiella grimontii
fosA6	Klebsiella pneumoniae
fosA	Klebsiella pneumoniae
fosA	Klebsiella pneumoniae
fosA	Klebsiella aerogenes
msr(E)	Acinetobacter baumannii
msr(E)	Acinetobacter baumannii
mecA	Staphylococcus epidermidis
mecA	Staphylococcus haemolyticus
mecA	Staphylococcus epidermidis
mecA	Staphylococcus epidermidis
mecA	Staphylococcus epidermidis
mecA	Staphylococcus epidermidis
mecA	Staphylococcus epidermidis
mecA	Staphylococcus haemolyticus
aac(6')-Ic	Serratia bockelmannii
aac(6')-Ii	Enterococcus_B faecium
aac(6')-Ii	Enterococcus_B faecium
aac(6')-Ii	Enterococcus_B faecium
OqxB	Klebsiella pneumoniae
OqxA	Klebsiella pneumoniae
OqxB	Klebsiella pneumoniae
OqxA	Klebsiella pneumoniae
OqxB	Klebsiella pneumoniae
OqxA	Klebsiella pneumoniae
OqxB	Klebsiella pneumoniae
OqxA	Klebsiella pneumoniae
OqxB	Klebsiella pneumoniae
OqxA	Klebsiella pneumoniae
OqxB	Klebsiella pneumoniae
OqxA	Klebsiella pneumoniae
OqxB	Klebsiella grimontii
OqxB	Klebsiella pneumoniae
OqxA	Klebsiella pneumoniae
OqxB	Klebsiella grimontii
OqxB	Klebsiella pneumoniae
OqxA	Klebsiella pneumoniae
OqxB	Klebsiella pneumoniae
OqxA	Klebsiella pneumoniae
OqxB	Klebsiella pneumoniae
OqxA	Klebsiella pneumoniae
OqxB	Klebsiella pneumoniae
OqxA	Klebsiella pneumoniae
OqxB	Klebsiella grimontii
OqxB	Klebsiella pneumoniae
OqxA	Klebsiella pneumoniae
OqxB	Klebsiella pneumoniae
OqxA	Klebsiella pneumoniae
OqxB	Klebsiella pneumoniae
OqxA	Klebsiella pneumoniae
OqxB	Klebsiella pneumoniae
OqxA	Klebsiella pneumoniae
OqxB	Klebsiella pneumoniae
OqxA	Klebsiella pneumoniae
OqxB	Klebsiella pneumoniae
OqxA	Klebsiella pneumoniae
OqxB	Klebsiella grimontii
OqxB	Klebsiella pneumoniae
OqxA	Klebsiella pneumoniae
OqxB	Klebsiella grimontii
OqxB	Klebsiella pneumoniae
OqxA	Klebsiella pneumoniae
OqxB	Klebsiella pneumoniae
OqxA	Klebsiella pneumoniae
OqxB	Klebsiella pneumoniae
OqxA	Klebsiella pneumoniae
OqxB	Klebsiella pneumoniae
OqxA	Klebsiella pneumoniae
OqxB	Klebsiella grimontii
blaSHV-78	Klebsiella pneumoniae
blaSHV-75	Klebsiella pneumoniae
blaSHV-75	Klebsiella pneumoniae
blaSHV-11	Klebsiella pneumoniae
blaMAL-1	Citrobacter_B koseri
blaMAL-1	Citrobacter_B koseri
blaMAL-1	Citrobacter_B koseri
blaSHV-89	Klebsiella pneumoniae
blaSHV-85	Klebsiella pneumoniae
blaSHV-79	Klebsiella pneumoniae
blaSHV-98	Klebsiella pneumoniae
blaSHV-70	Klebsiella pneumoniae
blaSHV-13	Klebsiella pneumoniae
blaSHV-40	Klebsiella pneumoniae
blaSHV-98	Klebsiella pneumoniae
mecA	Staphylococcus epidermidis
blaOXY-1-5	Klebsiella michiganensis
mecA	Staphylococcus haemolyticus
blaSHV-70	Klebsiella pneumoniae
blaSHV-13	Klebsiella pneumoniae
blaACT-15	Enterobacter hormaechei_B
mecA	Staphylococcus epidermidis
blaOXY-6-4	Klebsiella grimontii
mecA	Staphylococcus epidermidis
blaOXY-1-7	Klebsiella michiganensis
blaOXY-6-2	Klebsiella grimontii
mecA	Staphylococcus epidermidis
mecA	Staphylococcus epidermidis
blaOXY-1-5	Klebsiella michiganensis
blaSHV-40	Klebsiella pneumoniae
mecA	Staphylococcus epidermidis
blaOXY-6-2	Klebsiella grimontii
blaCMY-150	Citrobacter freundii
mecA	Staphylococcus haemolyticus
blaDHA-17	Morganella morganii
mecA	Staphylococcus epidermidis
blaOXY-1-5	Klebsiella michiganensis
mecA	Staphylococcus haemolyticus
blaACT-15	Enterobacter hormaechei_B
mecA	Staphylococcus epidermidis
blaOXY-6-4	Klebsiella grimontii
mecA	Staphylococcus epidermidis
blaOXY-1-7	Klebsiella michiganensis
blaOXY-6-2	Klebsiella grimontii
mecA	Staphylococcus epidermidis
mecA	Staphylococcus epidermidis
blaOXY-1-5	Klebsiella michiganensis
mecA	Staphylococcus epidermidis
blaOXY-6-2	Klebsiella grimontii
blaCMY-150	Citrobacter freundii
mecA	Staphylococcus haemolyticus
blaDHA-17	Morganella morganii
blaSHV-98	Klebsiella pneumoniae
mecA	Staphylococcus epidermidis
blaOXY-1-5	Klebsiella michiganensis
mecA	Staphylococcus haemolyticus
blaSHV-70	Klebsiella pneumoniae
blaSHV-13	Klebsiella pneumoniae
blaACT-15	Enterobacter hormaechei_B
mecA	Staphylococcus epidermidis
blaOXY-6-4	Klebsiella grimontii
mecA	Staphylococcus epidermidis
blaOXY-1-7	Klebsiella michiganensis
blaOXY-6-2	Klebsiella grimontii
mecA	Staphylococcus epidermidis
mecA	Staphylococcus epidermidis
blaOXY-1-5	Klebsiella michiganensis
blaSHV-40	Klebsiella pneumoniae
mecA	Staphylococcus epidermidis
blaOXY-6-2	Klebsiella grimontii
blaCMY-150	Citrobacter freundii
mecA	Staphylococcus haemolyticus
blaDHA-17	Morganella morganii
mecA	Staphylococcus epidermidis
mecA	Staphylococcus haemolyticus
mecA	Staphylococcus epidermidis
mecA	Staphylococcus epidermidis
mecA	Staphylococcus epidermidis
mecA	Staphylococcus epidermidis
mecA	Staphylococcus epidermidis
mecA	Staphylococcus haemolyticus
blaSHV-98	Klebsiella pneumoniae
mecA	Staphylococcus epidermidis
mecA	Staphylococcus haemolyticus
blaSHV-70	Klebsiella pneumoniae
blaSHV-13	Klebsiella pneumoniae
mecA	Staphylococcus epidermidis
mecA	Staphylococcus epidermidis
mecA	Staphylococcus epidermidis
mecA	Staphylococcus epidermidis
blaSHV-40	Klebsiella pneumoniae
mecA	Staphylococcus epidermidis
mecA	Staphylococcus haemolyticus
aph(3')-IIc	Stenotrophomonas maltophilia
bleO	Staphylococcus epidermidis
blaSHV-98	Klebsiella pneumoniae
blaSHV-70	Klebsiella pneumoniae
blaSHV-13	Klebsiella pneumoniae
blaSHV-40	Klebsiella pneumoniae
blaCMY-150	Citrobacter freundii
msr(E)	Acinetobacter baumannii
msr(E)	Acinetobacter baumannii
blaSHV-26	Klebsiella pneumoniae
mecA	Staphylococcus epidermidis
blaOXY-1-5	Klebsiella michiganensis
mecA	Staphylococcus haemolyticus
blaACT-15	Enterobacter hormaechei_B
mecA	Staphylococcus epidermidis
blaOXY-6-4	Klebsiella grimontii
mecA	Staphylococcus epidermidis
blaMAL-1	Citrobacter_B koseri
blaOXY-1-7	Klebsiella michiganensis
blaOXY-6-2	Klebsiella grimontii
mecA	Staphylococcus epidermidis
mecA	Staphylococcus epidermidis
blaMAL-1	Citrobacter_B koseri
blaOXY-1-5	Klebsiella michiganensis
blaMAL-1	Citrobacter_B koseri
blaSHV-56	Klebsiella pneumoniae
mecA	Staphylococcus epidermidis
blaOXY-6-2	Klebsiella grimontii
blaCMY-150	Citrobacter freundii
mecA	Staphylococcus haemolyticus
blaDHA-17	Morganella morganii
blaOXA-50	Pseudomonas aeruginosa
blaSHV-98	Klebsiella pneumoniae
blaSHV-78	Klebsiella pneumoniae
blaSHV-26	Klebsiella pneumoniae
mecA	Staphylococcus epidermidis
blaOXY-1-5	Klebsiella michiganensis
blaZ	Staphylococcus aureus
blaBRO-1	Moraxella catarrhalis
blaZ	Staphylococcus aureus
blaZ	Staphylococcus aureus
blaZ	Staphylococcus aureus
blaZ	Staphylococcus aureus
blaZ	Staphylococcus aureus
blaOXA-396	Pseudomonas aeruginosa
blaOXA-396	Pseudomonas aeruginosa
blaSHV-75	Klebsiella pneumoniae
blaZ	Staphylococcus aureus
mecA	Staphylococcus haemolyticus
blaSHV-75	Klebsiella pneumoniae
blaSHV-11	Klebsiella pneumoniae
blaSHV-70	Klebsiella pneumoniae
blaSHV-13	Klebsiella pneumoniae
blaACT-15	Enterobacter hormaechei_B
mecA	Staphylococcus epidermidis
blaZ	Staphylococcus epidermidis
blaZ	Staphylococcus epidermidis
blaZ	Staphylococcus epidermidis
blaZ	Staphylococcus epidermidis
blaZ	Staphylococcus epidermidis
blaZ	Staphylococcus epidermidis
blaZ	Staphylococcus epidermidis
blaZ	Staphylococcus epidermidis
blaOXY-6-4	Klebsiella grimontii
blaOXA-50	Pseudomonas aeruginosa
blaZ	Staphylococcus aureus
blaZ	Staphylococcus epidermidis
blaZ	Staphylococcus epidermidis
blaZ	Staphylococcus epidermidis
blaZ	Staphylococcus epidermidis
blaZ	Staphylococcus epidermidis
blaZ	Staphylococcus epidermidis
blaZ	Staphylococcus epidermidis
blaZ	Staphylococcus epidermidis
mecA	Staphylococcus epidermidis
blaMAL-1	Citrobacter_B koseri
blaOXY-1-7	Klebsiella michiganensis
blaOXY-6-2	Klebsiella grimontii
mecA	Staphylococcus epidermidis
blaZ	Staphylococcus epidermidis
blaZ	Staphylococcus epidermidis
blaZ	Staphylococcus epidermidis
blaZ	Staphylococcus epidermidis
blaZ	Staphylococcus epidermidis
blaZ	Staphylococcus epidermidis
blaZ	Staphylococcus epidermidis
blaZ	Staphylococcus epidermidis
blaZ	Staphylococcus epidermidis
blaZ	Staphylococcus epidermidis
blaZ	Staphylococcus epidermidis
blaZ	Staphylococcus epidermidis
blaZ	Staphylococcus epidermidis
blaZ	Staphylococcus epidermidis
blaZ	Staphylococcus epidermidis
blaZ	Staphylococcus epidermidis
mecA	Staphylococcus epidermidis
blaOXA-50	Pseudomonas aeruginosa
blaZ	Staphylococcus aureus
blaBRO-1	Moraxella catarrhalis
blaZ	Staphylococcus epidermidis
blaMAL-1	Citrobacter_B koseri
blaOXY-1-5	Klebsiella michiganensis
blaMAL-1	Citrobacter_B koseri
blaSHV-89	Klebsiella pneumoniae
blaSHV-85	Klebsiella pneumoniae
blaSHV-79	Klebsiella pneumoniae
blaSHV-56	Klebsiella pneumoniae
blaSHV-40	Klebsiella pneumoniae
blaBRO-2	Moraxella catarrhalis
mecA	Staphylococcus epidermidis
blaZ	Staphylococcus epidermidis
blaBRO-2	Moraxella catarrhalis
blaZ	Staphylococcus aureus
blaOXY-6-2	Klebsiella grimontii
blaCMY-150	Citrobacter freundii
blaZ	Staphylococcus haemolyticus
mecA	Staphylococcus haemolyticus
blaDHA-17	Morganella morganii
blaZ	Staphylococcus aureus
blaOXA-50	Pseudomonas aeruginosa
blaBRO-1	Moraxella catarrhalis
blaZ	Staphylococcus aureus
blaZ	Staphylococcus aureus
blaZ	Staphylococcus aureus
blaSHV-26	Klebsiella pneumoniae
mecA	Staphylococcus epidermidis
blaOXY-1-5	Klebsiella michiganensis
mecA	Staphylococcus haemolyticus
blaACT-15	Enterobacter hormaechei_B
mecA	Staphylococcus epidermidis
blaOXY-6-4	Klebsiella grimontii
mecA	Staphylococcus epidermidis
blaMAL-1	Citrobacter_B koseri
blaOXY-1-7	Klebsiella michiganensis
blaOXY-6-2	Klebsiella grimontii
mecA	Staphylococcus epidermidis
mecA	Staphylococcus epidermidis
blaMAL-1	Citrobacter_B koseri
blaOXY-1-5	Klebsiella michiganensis
blaMAL-1	Citrobacter_B koseri
blaSHV-56	Klebsiella pneumoniae
mecA	Staphylococcus epidermidis
blaOXY-6-2	Klebsiella grimontii
blaCMY-150	Citrobacter freundii
mecA	Staphylococcus haemolyticus
blaDHA-17	Morganella morganii
blaOXA-50	Pseudomonas aeruginosa
blaSHV-98	Klebsiella pneumoniae
blaSHV-78	Klebsiella pneumoniae
blaSHV-26	Klebsiella pneumoniae
mecA	Staphylococcus epidermidis
blaOXY-1-5	Klebsiella michiganensis
blaZ	Staphylococcus aureus
blaBRO-1	Moraxella catarrhalis
blaZ	Staphylococcus aureus
blaZ	Staphylococcus aureus
blaZ	Staphylococcus aureus
blaZ	Staphylococcus aureus
blaZ	Staphylococcus aureus
blaOXA-396	Pseudomonas aeruginosa
blaOXA-396	Pseudomonas aeruginosa
blaSHV-75	Klebsiella pneumoniae
blaZ	Staphylococcus aureus
mecA	Staphylococcus haemolyticus
blaSHV-75	Klebsiella pneumoniae
blaSHV-11	Klebsiella pneumoniae
blaSHV-70	Klebsiella pneumoniae
blaSHV-13	Klebsiella pneumoniae
blaACT-15	Enterobacter hormaechei_B
mecA	Staphylococcus epidermidis
blaZ	Staphylococcus epidermidis
blaZ	Staphylococcus epidermidis
blaZ	Staphylococcus epidermidis
blaZ	Staphylococcus epidermidis
blaZ	Staphylococcus epidermidis
blaZ	Staphylococcus epidermidis
blaZ	Staphylococcus epidermidis
blaZ	Staphylococcus epidermidis
blaTEM-1B	Escherichia coli
blaOXY-6-4	Klebsiella grimontii
blaOXA-50	Pseudomonas aeruginosa
blaZ	Staphylococcus aureus
blaZ	Staphylococcus epidermidis
blaZ	Staphylococcus epidermidis
blaZ	Staphylococcus epidermidis
blaZ	Staphylococcus epidermidis
blaZ	Staphylococcus epidermidis
blaZ	Staphylococcus epidermidis
blaZ	Staphylococcus epidermidis
blaZ	Staphylococcus epidermidis
mecA	Staphylococcus epidermidis
blaMAL-1	Citrobacter_B koseri
blaOXY-1-7	Klebsiella michiganensis
blaOXY-6-2	Klebsiella grimontii
mecA	Staphylococcus epidermidis
blaZ	Staphylococcus epidermidis
blaZ	Staphylococcus epidermidis
blaZ	Staphylococcus epidermidis
blaZ	Staphylococcus epidermidis
blaZ	Staphylococcus epidermidis
blaZ	Staphylococcus epidermidis
blaZ	Staphylococcus epidermidis
blaZ	Staphylococcus epidermidis
blaZ	Staphylococcus epidermidis
blaZ	Staphylococcus epidermidis
blaZ	Staphylococcus epidermidis
blaZ	Staphylococcus epidermidis
blaZ	Staphylococcus epidermidis
blaZ	Staphylococcus epidermidis
blaZ	Staphylococcus epidermidis
blaZ	Staphylococcus epidermidis
mecA	Staphylococcus epidermidis
blaOXA-50	Pseudomonas aeruginosa
blaZ	Staphylococcus aureus
blaBRO-1	Moraxella catarrhalis
blaZ	Staphylococcus epidermidis
blaMAL-1	Citrobacter_B koseri
blaOXY-1-5	Klebsiella michiganensis
blaMAL-1	Citrobacter_B koseri
blaSHV-89	Klebsiella pneumoniae
blaSHV-85	Klebsiella pneumoniae
blaSHV-79	Klebsiella pneumoniae
blaSHV-56	Klebsiella pneumoniae
blaSHV-40	Klebsiella pneumoniae
blaBRO-2	Moraxella catarrhalis
mecA	Staphylococcus epidermidis
blaZ	Staphylococcus epidermidis
blaBRO-2	Moraxella catarrhalis
blaZ	Staphylococcus aureus
blaOXY-6-2	Klebsiella grimontii
blaCMY-150	Citrobacter freundii
blaZ	Staphylococcus haemolyticus
mecA	Staphylococcus haemolyticus
blaDHA-17	Morganella morganii
blaZ	Staphylococcus aureus
blaOXA-50	Pseudomonas aeruginosa
blaBRO-1	Moraxella catarrhalis
blaZ	Staphylococcus aureus
blaZ	Staphylococcus aureus
blaZ	Staphylococcus aureus
aac(6')-Ic	Serratia bockelmannii
